# Supplementary material
Source: PubMed Central journal article supplement (PMC7816099)
Supplement: jama-e2023523-s001.pdf [file jama-e2023523-s001.pdf]

## **DEVT Trial Collaborators**

**Xinqiao Hospital of Army Medical University:** Qingwu Yang\*, Wenjie Zi, Zhongming Qiu, Fengli Li, Hongfei Sang, Deping Wu, Weidong Luo, Shuai Liu, Junjie Yuan, Jiaying Song, Hansheng Liu, Luming Chen, Jiacheng Huang, Guoqiang Yang, Zili Gong, Dong Zhang, and Jie Shuai\*

**The 904<sup>th</sup> Hospital of the Chinese People's Liberation Army:** Zhongming Shi\*, Jiaming Cao, Mirui Qu, Zhizhong Yan, Chunlei Zhang, Xun Zhu, Xiaogang Hu, Qiaohua Huan

**Maoming Traditional Chinese Medicine Hospital:** Wenguo Huang\*, Min Zhang\* , Dongrun Yan, Songsheng Ye

**Wuhan No. 1 Hospital:** Wenhua Liu\*, Zhangbao Guo\*, Kun Tang, Zhenhui Duan, Houjie Ni, Xiangqian Xu

**The First People's Hospital of Zigong:** Tao Qiu\*, Qiang Shi\*, Zhaoyun Guo, Keting Liu, Xiaoyong Deng, Ming Chen

**The First People's Hospital of Xiangyang:** Peiyang Zhou\*, Jincheng Liu, Pu Wang, Xiaojing Hu, Zhihua Cao, Guangzhi Liu, Chenglin Sun

**The Third People's Hospital of Zigong:** Li Wang\*, Zhiguo Li, Yan Liu, Senlin He

**Xuzhou Central Hospital:** Xinmin Fu\*, Qingqing Zhang, Qingfang Ma

**Yongchuan Hospital of Chongqing Medical University:** Shudong Liu\*, Libo Zhao, Ge Tang, Yu Chen

**The 902<sup>th</sup> Hospital of the Chinese People's Liberation Army:** Shiquan Yang\*, Dongzhang Xue, Chunmei Xue, Yiqun Wang

**The Affiliated Hospital of Yangzhou University:** Shuai Zhang\*, ZhenSheng Liu, Tiewu Tang

**Yijishan Hospital of Wannan Medical College:** Zhiming Zhou\*, Xianjun Huang\*, Xianhui Ding, Xiangjun Xu, Xianjin Shang

**Sichuan Mianyang 404 Hospita:** Jun Luo\*, Zhenxuan Tian, Shuanglong Liu, Zongqin Li, Xuejie Xu

**The Fifth People's Hospital of Chengdu:** Yan Wang\*, Pian Wang, Hongbo Zhang, Zheng Li, Qingbin Zhang

**The First Affiliated Hospital of Henan Science and Technology University:** Yongjie Bai\*, Jisheng Qi, Lina Huang

**Jiangmen Central Hospital:** Min Zhang\*, Weipeng Dai

**Chongzhou People's Hospital:** Youlin Wu\*, Xiurong Zhu, Wenbin Wu, Xiyang Chen, Shifu Liang, Hong Zhao, Yanxue Zheng

**Ganzhou People's Hospital:** Guoyong Zeng\*, Hongliang Zeng, Qingqing Fu

**Yangluo District of Hubei Zhongshan Hospital:** Yue Wan\*, Jing Zuo, Yingbing Ke

**Nanyang Central Hospital:** Changming Wen\*, Shuang Pei, Jun Sun, Fanghui Bai, Ning Wang, Yang Yu

**Xiangyang Central Hospital:** Hongbin Wen\*, Xuan Liu, Jin Xu, Ping Yu

**Zhongshan People's Hospital:** Wentong Ling\*, Huan Cai, Wenjun Wu

**Mianzhu People's Hospital:** Zhuo Chen\*, Jingyu Tan, Xingju Zhong, Yong Wu

**Deyang People's Hospital:** Miao Peng\*, Pan Huang, Duanxiu Liao, Hong Chen

**Taihe Hospital of Shiyan:** Zhibing Ai\*, Yueliang Zhang, Jiang Yuan, Chaohui Cheng

**Sichuan Provincial People's Hospital:** Fuqiang Guo\*, Jianhong Wang, Shu Yang

**Zhongnan Hospital of Wuhan University:** Huagang Li\*, Yumin Liu, Dong Sun, Fei Xie

**Chongqing Three Gorges Central Hospital:** Jing Guo\*, Shengli Chen, Rong Deng

**The Third Affiliated Hospital of Guangzhou Medical University:** Haitao Guan\*, Yanling Liang, Wei Li

**Huazhou People's Hospital:** Zhiyi Wang\*, Zhiliang Li

**Lu'an People's Hospital:** Yong Liu\*, Ping Jin, Hongjiang Zhai, Ran Chen

**Hubei Provincial People's Hospital:** Jie Pu\*, Fei Zeng, Jian Jiang

**Changsha Central Hospital:** Zhen Wang\*, Wei Xu, Tieqiao Feng
