# Supplementary material
Source: PubMed Central journal article supplement (PMC7816099)
Supplement: jama-e2023523-s002.pdf [file jama-e2023523-s002.pdf]

1  
2  
3  
4  
5  
6  
7  
8  
9  
10  
11  
12  
13  
14  
15  
16  
17  
18  
19  
20  
21  
22  
23

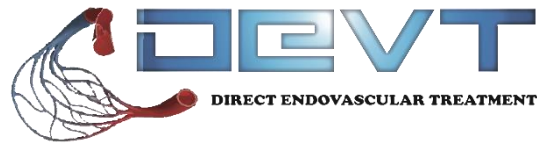

**Effect of Endovascular Treatment Alone Versus Intravenous Alteplase Plus  
Endovascular Treatment on Functional Independence in Patients with  
Acute Ischemic Stroke: The DEVT Randomized Clinical Trial**

**Trial Protocol**

This supplement contains the following items:

1. Original Trial Protocol (page 2 to 33)
2. Final Trial Protocol (page 34 to 65)
3. Summary of changes (page 66 to 68)

Note: personal identifying information has been redacted from the protocol documents to comply with international privacy legislation.

24  
25  
26  
27

**Sponsor**

Army Medical University  
No. 30 Gaotanyan Main Street, Chongqing, China

**Principle Investigators**

Professor Qingwu Yang, Jie Shuai  
Professor Raul Gomes Nogueira

28  
29  
30  
31  
32

33 **DEVT: A randomized, controlled, multicenter trial of direct endovascular treatment**  
34 **versus standard bridging therapy for acute stroke patients with large vessel occlusion in**  
35 **the anterior circulation**

36  
37

38 **Protocol Version: 1.0**

39 **Issue Date: 30th March 2018**

---

**CONTENTS**

|    |                                                                                   |           |
|----|-----------------------------------------------------------------------------------|-----------|
| 40 |                                                                                   |           |
| 41 | <b>List of Abbreviations.....</b>                                                 | <b>5</b>  |
| 42 | <b>Study Synopsis.....</b>                                                        | <b>7</b>  |
| 43 | <b>Schedule of Assessments .....</b>                                              | <b>10</b> |
| 44 | <b>1. BACKGROUND INFORMATION.....</b>                                             | <b>11</b> |
| 45 | <b>2. TRIAL OBJECTIVES.....</b>                                                   | <b>11</b> |
| 46 | <b>3. TRIAL DESIGN.....</b>                                                       | <b>11</b> |
| 47 | <b>4. PATIENT POPULATION .....</b>                                                | <b>12</b> |
| 48 | <b>4.1. Inclusion criteria .....</b>                                              | <b>12</b> |
| 49 | <b>4.2. Exclusion criteria.....</b>                                               | <b>12</b> |
| 50 | <b>5. PARTICIPATING CENTER ELIGIBILITY .....</b>                                  | <b>13</b> |
| 51 | <b>6. RANDOMIZATION .....</b>                                                     | <b>13</b> |
| 52 | <b>7. TREATMENTS.....</b>                                                         | <b>13</b> |
| 53 | <b>8. OUTCOMES.....</b>                                                           | <b>13</b> |
| 54 | <b>8.1. Primary Efficacy Outcome.....</b>                                         | <b>13</b> |
| 55 | <b>8.2. Secondary Efficacy Outcomes.....</b>                                      | <b>14</b> |
| 56 | <b>8.3 Safety Outcomes .....</b>                                                  | <b>14</b> |
| 57 | <b>9. BLINDING AND MASKING .....</b>                                              | <b>14</b> |
| 58 | <b>10. ASSESSMENT OF EFFICACY .....</b>                                           | <b>15</b> |
| 59 | <b>10.1. The Modified Rankin Scale .....</b>                                      | <b>15</b> |
| 60 | <b>10.2. The National Institutes of Health Stroke Scale .....</b>                 | <b>15</b> |
| 61 | <b>10.3. EQ-5D.....</b>                                                           | <b>15</b> |
| 62 | <b>11. ASSESSMENT OF SAFETY .....</b>                                             | <b>15</b> |
| 63 | <b>11.1. Adverse Event Definitions .....</b>                                      | <b>15</b> |
| 64 | <b>11.1.1. Adverse Event.....</b>                                                 | <b>15</b> |
| 65 | <b>11.1.2. Serious Adverse Event .....</b>                                        | <b>16</b> |
| 66 | <b>11.2. Definitions of AE-Related Terms.....</b>                                 | <b>16</b> |
| 67 | <b>12. CLINICAL MANAGEMENT OF ADVERSE EVENTS.....</b>                             | <b>16</b> |
| 68 | <b>12.1. Identification of Adverse Events by the Investigator.....</b>            | <b>16</b> |
| 69 | <b>12.2. Reporting of Adverse Events.....</b>                                     | <b>17</b> |
| 70 | <b>12.3. Reporting of Serious Adverse Events .....</b>                            | <b>17</b> |
| 71 | <b>12.4. Reporting by the Investigator .....</b>                                  | <b>17</b> |
| 72 | <b>12.5. Reporting SAEs to the Health Authorities and Ethics Committees .....</b> | <b>17</b> |
| 73 | <b>13. DATA SAFETY MONITORING BOARD.....</b>                                      | <b>17</b> |
| 74 | <b>14. IMAGING CORE LABORATORY.....</b>                                           | <b>18</b> |
| 75 | <b>15. CLINICAL EVENTS COMMITTEE .....</b>                                        | <b>18</b> |
| 76 | <b>16. STATISTICS .....</b>                                                       | <b>18</b> |
| 77 | <b>16.1. Sample size estimates .....</b>                                          | <b>18</b> |
| 78 | <b>16.2. Analysis Populations .....</b>                                           | <b>18</b> |
| 79 | <b>16.2.1. Intention-to-treat Population .....</b>                                | <b>18</b> |
| 80 | <b>16.2.2. Per Protocol Population.....</b>                                       | <b>18</b> |
| 81 | <b>16.3. Analysis of Primary Efficacy Outcome .....</b>                           | <b>18</b> |
| 82 | <b>16.4. Analysis of secondary efficacy outcomes.....</b>                         | <b>19</b> |
| 83 | <b>16.5. Adjustment for covariates and subgroup analyses .....</b>                | <b>19</b> |

---

|     |                                                                                   |    |
|-----|-----------------------------------------------------------------------------------|----|
| 84  | <b>16.6. Handling of Missing Data</b> .....                                       | 19 |
| 85  | <b>16.7. Analyses of Safety</b> .....                                             | 19 |
| 86  | <b>17. DIRECT ACCESS TO SOURCE DATA/DOCUMENTS</b> .....                           | 19 |
| 87  | <b>18. QUALITY CONTROL AND QUALITY ASSURANCE</b> .....                            | 20 |
| 88  | <b>18.1. Audits and Inspections</b> .....                                         | 20 |
| 89  | <b>18.2. Protocol Amendments and Revisions</b> .....                              | 21 |
| 90  | <b>19. ETHICAL CONSIDERATION</b> .....                                            | 21 |
| 91  | <b>20. DATA HANDLING AND RECORD KEEPING</b> .....                                 | 21 |
| 92  | <b>20.1. Data Handling</b> .....                                                  | 21 |
| 93  | <b>20.2. Investigator Files/Retention of Documents</b> .....                      | 21 |
| 94  | <b>20.3. Source Documents and Background Data</b> .....                           | 22 |
| 95  | <b>20.4. Case Report Forms</b> .....                                              | 22 |
| 96  | <b>20.5. Confidentiality</b> .....                                                | 22 |
| 97  | <b>21. PUBLICATION AND PRESENTATION POLICY</b> .....                              | 22 |
| 98  | <b>22. DATA-SHARING PLAN</b> .....                                                | 23 |
| 99  | <b>23. STUDY ORGANIZATION AND FUNDING</b> .....                                   | 23 |
| 100 | <b>Appendix 1 – Classification of Subtype of Acute Ischemic Stroke</b> .....      | 24 |
| 101 | <b>Appendix 2 - ASITN/SIR Collateral Vessel Grading System</b> .....              | 27 |
| 102 | <b>Appendix 3 - The Alberta Stroke Program Early Computed Tomography Score</b>    |    |
| 103 | <b>(ASPECTS)</b> .....                                                            | 28 |
| 104 | <b>Appendix 4 - Modified Rankin Scale (MRS)</b> .....                             | 29 |
| 105 | <b>Appendix 5 - Modified Treatment In Cerebral Infarction (mTICI) Score</b> ..... | 30 |
| 106 | <b>Investigator’s Agreement</b> .....                                             | 31 |
| 107 | <b>REFERENCES</b> .....                                                           | 32 |
| 108 |                                                                                   |    |

109

**List of Abbreviations**

|           |                                                                                                            |
|-----------|------------------------------------------------------------------------------------------------------------|
| AE        | Adverse Event                                                                                              |
| AIS       | Acute Ischemia Stroke                                                                                      |
| ASITN/SIR | American Society of Interventional and Therapeutic Neuroradiology/Society of Interventional Radiology      |
| ASPECTS   | Alberta Stroke Program Early Computed Tomography Score                                                     |
| BP        | Blood Pressure                                                                                             |
| CEC       | Clinical Events Committee                                                                                  |
| CRF       | Case Report Form                                                                                           |
| CTA       | Computed Tomographic Angiography                                                                           |
| DEVT      | Direct Endovascular Treatment Versus Standard Bridging Therapy in Large Artery Anterior Circulation Stroke |
| DSA       | Digital Subtraction Angiography                                                                            |
| DSMB      | Data Safety Monitoring Board                                                                               |
| ECG       | Electrocardiogram                                                                                          |
| EQ-5D     | European Quality Five Dimensions                                                                           |
| EVT       | Endovascular Treatment                                                                                     |
| GCP       | Good Clinical Practice                                                                                     |
| HbA1c     | Hemoglobin A1c                                                                                             |
| HCG       | Human Chorionic Gonadotropin                                                                               |
| HR        | Heart Rate                                                                                                 |
| ICA       | Internal Carotid Artery                                                                                    |
| ICH-GCP   | International Conference on Harmonization-Good Clinical Practice                                           |
| INR       | International Normalized Ratio                                                                             |
| IRB       | Institutional Review Board                                                                                 |
| ITT       | Intention-To-Treat                                                                                         |
| IVT       | Intravenous Thrombolysis                                                                                   |
| LAR       | Legally Authorized Representative                                                                          |
| LVO       | Large Vessel Occlusion                                                                                     |
| MCA       | Middle Cerebral Artery                                                                                     |
| MR        | Magnetic Resonance                                                                                         |
| MRA       | Magnetic Resonance Angiography                                                                             |

---

|       |                                               |
|-------|-----------------------------------------------|
| mRS   | Modified Rankin Scale                         |
| NCCT  | Non-Contrast Computed Tomography              |
| NIHSS | National Institutes of Health Stroke Scale    |
| PP    | Per-Protocol                                  |
| QA    | Quality Assurance                             |
| RCT   | Randomized Controlled Trial                   |
| REB   | Research Ethics Board                         |
| rt-PA | Recombinant Tissue-type Plasminogen Activator |
| SAE   | Serious Adverse Event                         |
| SICH  | Symptomatic Intracranial Hemorrhage           |
| SOPs  | Standard Operating Procedures                 |
| Temp  | Temperature                                   |
| TIA   | Transient Ischemic Attack                     |
| TOAST | Trial of Org 10172 in Acute Stroke Treatment  |

111 **Study Synopsis**

|                         |                                                                                                                                                                                                                                                                                                                                                                                                                                                                                                                                                                                                                                                                                                                                                                                                                                                                                                                                                                                                                                                                                                                                                                                                                                                                                                                                                                                                                                                                                                                                                                                                                                                                                                                                                                                                                                                                                                                                                                                                                    |
|-------------------------|--------------------------------------------------------------------------------------------------------------------------------------------------------------------------------------------------------------------------------------------------------------------------------------------------------------------------------------------------------------------------------------------------------------------------------------------------------------------------------------------------------------------------------------------------------------------------------------------------------------------------------------------------------------------------------------------------------------------------------------------------------------------------------------------------------------------------------------------------------------------------------------------------------------------------------------------------------------------------------------------------------------------------------------------------------------------------------------------------------------------------------------------------------------------------------------------------------------------------------------------------------------------------------------------------------------------------------------------------------------------------------------------------------------------------------------------------------------------------------------------------------------------------------------------------------------------------------------------------------------------------------------------------------------------------------------------------------------------------------------------------------------------------------------------------------------------------------------------------------------------------------------------------------------------------------------------------------------------------------------------------------------------|
| <b>Trial Objectives</b> | The objective is to determine whether endovascular treatment alone is non-inferior to intravenous thrombolysis bridging endovascular treatment in acute anterior circulation large vessel occlusive patients who are eligible for intravenous rt-PA.                                                                                                                                                                                                                                                                                                                                                                                                                                                                                                                                                                                                                                                                                                                                                                                                                                                                                                                                                                                                                                                                                                                                                                                                                                                                                                                                                                                                                                                                                                                                                                                                                                                                                                                                                               |
| <b>Trial Design</b>     | This study is a randomized, controlled, multicenter trial with blinded outcome assessment. This trial uses a five-look group-sequential non-inferiority design. Up to 194 patients in each interim analysis will be consecutively randomized to endovascular treatment alone or rt-PA plus endovascular treatment group in 1:1 ratio over three years from about 35 hospitals in China.                                                                                                                                                                                                                                                                                                                                                                                                                                                                                                                                                                                                                                                                                                                                                                                                                                                                                                                                                                                                                                                                                                                                                                                                                                                                                                                                                                                                                                                                                                                                                                                                                            |
| <b>Subjects</b>         | <p><u>Inclusion criteria</u></p> <ol style="list-style-type: none"> <li>1) Aged 18 years or older;</li> <li>2) Presenting with acute ischemic stroke (AIS) symptom within 4.5 hours;</li> <li>3) Eligible for IV rt-PA;</li> <li>4) Occlusion of the intracranial internal carotid artery (ICA) or M1 segment of the middle cerebral artery (MCA) confirmed by CT or MR angiography (CTA or MRA);</li> <li>5) Randomization no later than 4 hours 15 minutes after stroke symptom onset;</li> <li>6) Informed consent obtained from patients or their legal representatives.</li> </ol> <p><u>Exclusion criteria</u></p> <ol style="list-style-type: none"> <li>1) CT or MR evidence of hemorrhage (the presence of micro-bleeds is allowed);</li> <li>2) Contraindications of IV rt-PA;</li> <li>3) Pre-morbidity with a modified Rankin scale (mRS) score of <math>\geq 2</math>;</li> <li>4) Currently in pregnant or lactating or serum beta human chorionic gonadotrophin (HCG) test is positive on admission;</li> <li>5) Contraindication to radiographic contrast agents, nickel, titanium metals or their alloys;</li> <li>6) Arterial tortuosity and/or other arterial disease that would prevent the device from reaching the target vessel;</li> <li>7) Patients with a preexisting neurological or psychiatric disease that would confound the neurological functional evaluations;</li> <li>8) Subjects with occlusions in multiple vascular territories (e.g. bilateral anterior circulation, or anterior/posterior circulation);</li> <li>9) CT or MRI evidence of mass effect or intracranial tumor (except small meningioma);</li> <li>10) CT or MRI evidence of cerebral vasculitis;</li> <li>11) CTA or MRA evidence of intracranial arteriovenous malformations or aneurysms;</li> <li>12) Any terminal illness with life expectancy less than 6 months;</li> <li>13) Unlikely to be available for 90-day follow-up;</li> <li>14) Current participation in another clinical trial.</li> </ol> |
| <b>Treatments</b>       | Patients are assigned to receive either endovascular treatment (EVT) alone (primary-thrombectomy group) or rt-PA plus EVT (bridging-therapy group). In the bridging-therapy group, subjects will receive a single rt-PA dose of 0.9 mg/kg IV (maximum dose: 90 mg), with 10% given as a bolus, followed by continuous IV                                                                                                                                                                                                                                                                                                                                                                                                                                                                                                                                                                                                                                                                                                                                                                                                                                                                                                                                                                                                                                                                                                                                                                                                                                                                                                                                                                                                                                                                                                                                                                                                                                                                                           |

|                               |  |                                                                                                                                                                                                                                                                                                                                                                                                                                                                                                                                                                                                                                                                                                                                                                                                                                                                                                                                           |
|-------------------------------|--|-------------------------------------------------------------------------------------------------------------------------------------------------------------------------------------------------------------------------------------------------------------------------------------------------------------------------------------------------------------------------------------------------------------------------------------------------------------------------------------------------------------------------------------------------------------------------------------------------------------------------------------------------------------------------------------------------------------------------------------------------------------------------------------------------------------------------------------------------------------------------------------------------------------------------------------------|
|                               |  | infusion of the rest dose within 1 hour. Simultaneously, EVT preparation should be initiated with or as soon as IV rt-PA administration. While in the primary-thrombectomy group, subjects will receive EVT directly without prior IV rt-PA. Subjects in both groups will undergo rapid EVT. EVT consisted of mechanical thrombectomy, thromboaspiration, balloon dilation, stenting, intra-arterial thrombolysis, or various combinations of these approaches.                                                                                                                                                                                                                                                                                                                                                                                                                                                                           |
| <b>Consent</b>                |  | Explicit written, signed informed consent from the subject or legally authorized representative will be obtained prior to any protocol specific procedures.                                                                                                                                                                                                                                                                                                                                                                                                                                                                                                                                                                                                                                                                                                                                                                               |
| <b>Randomization Method</b>   |  | Subjects will be randomly assigned in a 1:1 fashion to receive EVT alone or IV rt-PA plus EVT. Randomization occurs immediately after baseline (at the EVT institution) CT/MR brain imaging and CT/MR angiography via a real-time, internet-based randomization method. The randomization was stratified by participating centers.                                                                                                                                                                                                                                                                                                                                                                                                                                                                                                                                                                                                        |
| <b>Duration of Treatment</b>  |  | This study consists of one 90-day study period for each subject. Subjects will be hospitalized for care after their acute stroke according to the current standard of care. Subjects are required to return to clinic on Day 90 for end-of-study procedures.                                                                                                                                                                                                                                                                                                                                                                                                                                                                                                                                                                                                                                                                              |
| <b>Laboratory Tests</b>       |  | In order to support the assessment of patient safety baseline, chemistry laboratory tests will be completed. At baseline, blood work will be evaluated which includes: Blood cell counts, triglyceride, cholesterol, low density lipoprotein, high density lipoprotein, homocysteine, glucose, procalcitonin, HbA1C, prothrombin time, activated partial thromboplastin time, thrombin time, fibrinogen, D-dimer, international normalized ratio.<br><br>If the subject is female and is of childbearing potential, a pregnancy test (urine or serum point-of-care pregnancy test) must be completed and a negative test result obtained prior to inclusion in the trial.<br><br>Electrocardiograms will also be collected and reviewed at baseline.                                                                                                                                                                                      |
| <b>Assessment of Efficacy</b> |  | The primary efficacy outcome is the overall proportion of subjects experiencing a functional independence 90 days post randomization, defined as a score of 0 to 2 on the mRS.<br><br>The secondary efficacy outcomes include:<br>1) Proportion of mRS score 0 to 1 at 90 days;<br>2) Shift in the distribution of mRS scores at 90 days in EVT alone versus rt-PA plus EVT (ordinal shift analysis);<br>3) Successful recanalization proportion immediate after EVT. Successful recanalization is defined as a modified Treatment in Cerebral Infarction score of 2b (50 to 99% reperfusion) or 3 (complete reperfusion) in the post-procedure angiography;<br>4) Vessel recanalization rate evaluated by CTA or MRA within 48 hours;<br>5) The change of the National Institutes of Health Stroke Scale (NIHSS) score at 24 hours from baseline;<br>6) The change of the NIHSS score at 5-7 days or discharge if earlier from baseline; |



---

|                             |                                                                                                                                                                                                                                                                                                              |
|-----------------------------|--------------------------------------------------------------------------------------------------------------------------------------------------------------------------------------------------------------------------------------------------------------------------------------------------------------|
|                             | 7) European Quality Five Dimensions (EQ-5D) scale score at 90 days.                                                                                                                                                                                                                                          |
| <b>Assessment of Safety</b> | 1) Symptomatic intracerebral hemorrhage (sICH) rate within 48 hours;<br>2) Mortality at 90 days;<br>3) Procedure-related complications such as arterial perforation, iatrogenic arterial dissection, arterial access site hematoma, and retroperitoneal hematoma;<br>4) Incidence of serious adverse events. |

112

113

114 **Schedule of Assessments**

|                                                                        | Baseline                  | Day 1<br>(24 ± 12 h<br>from<br>randomization) | Day 2<br>(48 ± 8 h from<br>randomization) | Day 5 or<br>discharge (±1<br>d) | Day 90 (±14<br>d) |
|------------------------------------------------------------------------|---------------------------|-----------------------------------------------|-------------------------------------------|---------------------------------|-------------------|
| Informed consent                                                       | X                         |                                               |                                           |                                 |                   |
| History and examination                                                | X                         |                                               |                                           |                                 |                   |
| Weight                                                                 | X                         |                                               |                                           |                                 |                   |
| Vital Signs (BP, HR,<br>Temp)                                          | X                         | X                                             | X                                         | X                               |                   |
| Randomization                                                          | X                         |                                               |                                           |                                 |                   |
| NIHSS                                                                  | X                         | X                                             |                                           | X                               |                   |
| mRS                                                                    | X*                        |                                               |                                           |                                 | X                 |
| ASPECTS                                                                | X                         |                                               |                                           |                                 |                   |
| EQ-5D                                                                  |                           |                                               |                                           |                                 | X                 |
| CBC, electrolytes, INR,<br>aPTT, serum creatinine<br>and serum glucose | X                         | X                                             |                                           |                                 |                   |
| Pregnancy test‡                                                        | X                         |                                               |                                           |                                 |                   |
| NCCT/MR head                                                           | X                         |                                               | X**                                       |                                 |                   |
| CTA/MRA                                                                | X                         |                                               | X                                         |                                 |                   |
| ECG                                                                    | X                         |                                               |                                           |                                 |                   |
| Endovascular Procedure                                                 | X                         |                                               |                                           |                                 |                   |
| sICH                                                                   |                           |                                               | X                                         |                                 |                   |
| Mortality                                                              |                           |                                               |                                           | X                               | X                 |
| AE assessment                                                          | Collected to Day 30 visit |                                               |                                           |                                 |                   |
| SAE assessment                                                         | Collected to Day 90 visit |                                               |                                           |                                 |                   |
| Prior medications                                                      | X                         |                                               |                                           |                                 |                   |
| Concomitant medications                                                | Collected to Day 30 visit |                                               |                                           |                                 |                   |

115 \* Historical (pre-stroke) score.

116 \*\* MR head may be supplanted by an NCCT head if MR is unavailable.

117 ‡ If the subject is female and is of childbearing potential a pregnancy test (urine or serum point-of-care  
 118 pregnancy test) must be completed and the result must be negative; this is the only mandatory laboratory test  
 119 prior to randomization

120

## 121 **1. BACKGROUND INFORMATION**

122 Intravenous thrombolysis with recombinant tissue plasminogen activator (rt-PA) within 4.5 hours of symptom  
123 onset is the first-line treatment for acute ischemic stroke(AIS)<sup>1,2</sup>. Several randomized controlled trials have  
124 consistently demonstrated that intravenous thrombolysis bridging with endovascular treatment (namely bridging  
125 therapy) is superior to intravenous thrombolysis alone for acute anterior large vessel occlusion(LVO)<sup>3-9</sup>.  
126 Intravenous thrombolysis prior to endovascular treatment can be initiated earlier, help eliminate thrombi in distal  
127 or small arteries which are inaccessible for revascularization devices, facilitate mechanical thrombectomy, and  
128 thereby increasing the rate of reperfusion<sup>10,11</sup>. However, intravenous thrombolysis also has some drawbacks. For  
129 instance, it may increase the risk of intracranial or systemic hemorrhage<sup>12</sup>, especially when anti-thrombotic  
130 therapy is administrated after angioplasty and/or stenting. It may also postpone endovascular treatment and  
131 increase medical expenditures<sup>13</sup>. The therapeutic time window of intravenous thrombolysis is very narrow, which  
132 has largely limited its application.

133 It remains uncertain whether pretreated with intravenous rt-PA provides any additional benefits to the acute  
134 anterior large vessel occlusive patients experiencing endovascular treatment. A meta-analysis revealed that  
135 patients treated with bridging therapy have higher recanalization rates, fewer device passes, equal probabilities  
136 of symptomatic intracerebral hemorrhage, better clinical neurological outcomes, and lower mortality rates  
137 compared with patients treated with direct endovascular treatment<sup>14</sup>. Whereas, a propensity score matching  
138 analysis based on the Chinese population suggested that direct endovascular treatment can achieve similar  
139 efficacy to that of bridging therapy, and a lower proportion of asymptomatic intracranial hemorrhage<sup>12</sup>. However,  
140 the baseline characteristics for the direct endovascular treatment group and bridging-therapy group of these  
141 studies are lack of equipoise, which may have significant influence on the results. Prospective data on direct  
142 endovascular treatment for acute anterior large vessel occlusion remains scarce. Thus, we propose the hypothesis  
143 that EVT alone initiated within 4.5 h of stroke onset is not inferior to rt-PA plus EVT in acute stroke patients  
144 with a proximal LVO in the anterior circulation.

145

## 146 **2. TRIAL OBJECTIVES**

147 Direct Endovascular Treatment Versus Standard Bridging Therapy in Large Artery Anterior Circulation Stroke  
148 (DEVT) Trial aims to investigate whether EVT alone is non-inferior to rt-PA plus EVT in acute anterior  
149 circulation large vessel occlusive patients who are eligible for intravenous rt-PA.

150

## 151 **3. TRIAL DESIGN**

152 DEVT trial is a multicenter, prospective, randomized, open-label controlled clinical trial with blinded endpoint  
153 evaluation. It is an academic trial designed by the principal investigators and a steering committee consisting of  
154 experts in cerebrovascular diseases and interventional neuroradiology. The study patient flow outline was shown  
155 in Figure 1.

156 Figure 1 Study flowchart of DEVT trial.

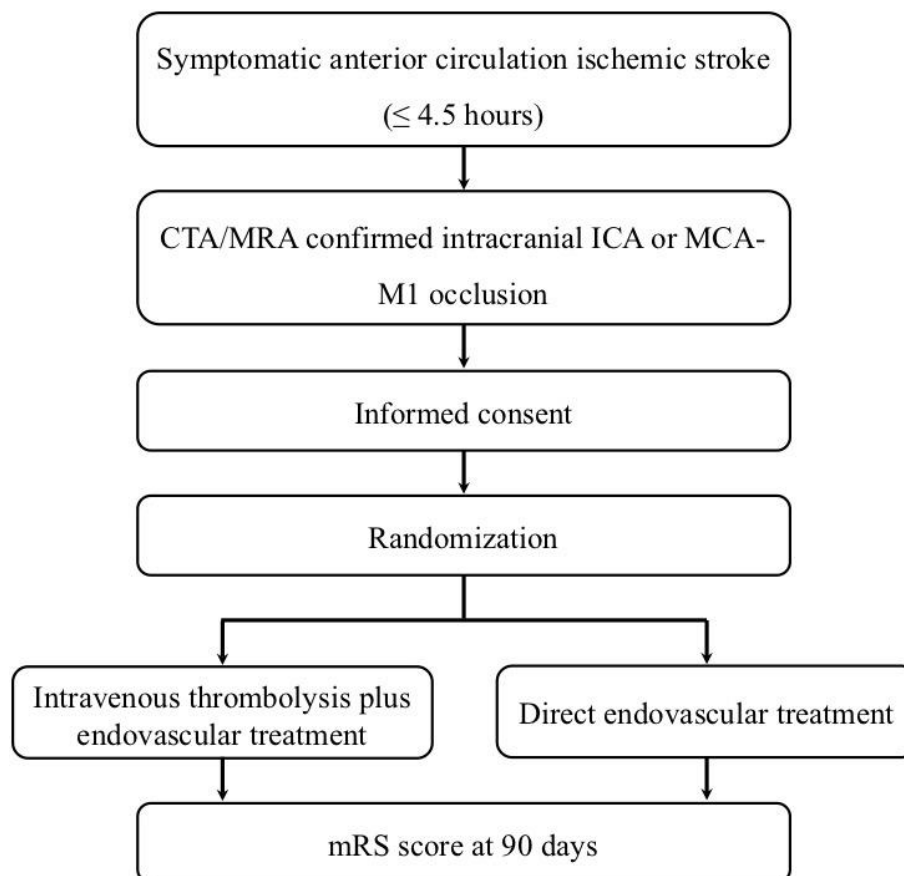

157

#### 158 4. PATIENT POPULATION

##### 159 4.1. Inclusion criteria

- 160 (1) Aged 18 years or older;
- 161 (2) Presenting with AIS symptom within 4.5 hours;
- 162 (3) Eligible for IV rt-PA;
- 163 (4) Occlusion of the intracranial internal carotid artery (ICA) or M1 segment of the middle cerebral artery
- 164 (MCA) confirmed by CT or MR angiography (CTA or MRA);
- 165 (5) Randomization no later than 4 hours 15 minutes after stroke symptom onset;
- 166 (6) Informed consent obtained from patients or their legal representatives.

##### 167 4.2. Exclusion criteria

- 168 (1) CT or MR evidence of hemorrhage (the presence of micro-bleeds is allowed);
- 169 (2) Contraindications of IV rt-PA;
- 170 (3) Pre-morbidity with a modified Rankin scale (mRS) score of  $\geq 2$ ;
- 171 (4) Currently in pregnant or lactating or serum beta HCG test is positive on admission;
- 172 (5) Contraindication to radiographic contrast agents, nickel, titanium metals or their alloys;
- 173 (6) Arterial tortuosity and/or other arterial disease that would prevent the device from reaching the target
- 174 vessel;
- 175 (7) Patients with a preexisting neurological or psychiatric disease that would confound the neurological
- 176 functional evaluations;
- 177 (8) Subjects with occlusions in multiple vascular territories (e.g. bilateral anterior circulation, or
- 178 anterior/posterior circulation);
- 179 (9) CT or MRI evidence of mass effect or intracranial tumor (except small meningioma);
- 180 (10) CT or MRI evidence of cerebral vasculitis;

- 181 (11) CTA or MRA evidence of intracranial arteriovenous malformations or aneurysms;  
182 (12) Any terminal illness with life expectancy less than 6 months;  
183 (13) Unlikely to be available for 90-day follow-up;  
184 (14) Current participation in another clinical trial.

185

## 186 **5. PARTICIPATING CENTER ELIGIBILITY**

187 To be fully eligible for participation in this trial, study centers were required have performed at least 80  
188 endovascular procedures annually, including at least 50 thrombectomy procedures with the stent-retriever  
189 devices. Moreover, all neurointerventionists with more than five years' experience in cerebrovascular  
190 intervention and at least 10 cases of mechanical thrombectomy with stent retriever devices annually.

191

## 192 **6. RANDOMIZATION**

193 Subjects will be randomly assigned in a 1:1 fashion to receive EVT alone or IV rt-PA plus EVT. Randomization  
194 occurs immediately after baseline (at the EVT institution) CT/MR brain imaging and CT/MR angiography via a  
195 real-time, internet-based randomization method. The randomization was stratified by participating centers. The  
196 time of randomization is defined as the time randomization occurred on the central server and this time is  
197 considered time zero for the study. IV rt-PA will be infused immediately after randomization.

198 All subjects, investigators, their clinical staff, the clinical coordinating center, the data management group, and  
199 the sponsor staff and delegates will be blinded to the randomization codes. The local laboratories will also be  
200 blinded.

201

## 202 **7. TREATMENTS**

203 Patients are assigned to receive either EVT alone (primary-thrombectomy group) or rt-PA plus EVT  
204 (bridging-therapy group). In the bridging-therapy group, subjects will receive a single rt-PA dose of 0.9 mg/kg  
205 IV (maximum dose: 90 mg), with 10% given as a bolus, followed by continuous IV infusion of the rest dose  
206 within 1 hour. Simultaneously, EVT preparation should be initiated with or as soon as IV rt-PA administration.  
207 While in the primary-thrombectomy group, subjects will receive EVT alone without prior IV rt-PA. Subjects in  
208 both groups will undergo rapid EVT. EVT consisted of mechanical thrombectomy, thromboaspiration, balloon  
209 dilation, stenting, intra-arterial thrombolysis, or various combinations of these approaches. The choice of  
210 technique is left to the discretion of the treating neurointerventionist. Additionally, stenting of the extracranial or  
211 intracranial artery is permitted when absolutely necessary to obtain access to distal occlusion or to prevent acute  
212 re-occlusion. This may require the use of thrombolytic agents to prevent acute stent thrombosis. After  
213 recanalization of the target artery, all patients will get stroke unit care and postoperative management follows the  
214 current American Heart Association/American Stroke Association guidelines<sup>15</sup>.

215 The use of conscious sedation or general anesthesia for the procedure to ensure the comfort and safety of patients  
216 is at the discretion of the individual site neurointerventionalist. The steering committee will make  
217 recommendations for dosages of thrombolytic agents, procedures, and for devices that will be considered in the  
218 trial based on proposals by the executive committee or local investigators. The requirements for a device to be  
219 considered in the trial should be approved by the China Food and Drug Administration or National Medical  
220 Products Administration.

221

## 222 **8. OUTCOMES**

### 223 **8.1. Primary Efficacy Outcome**

224 The primary end-point is the overall proportion of subjects experiencing a functional independence 90 days post  
225 randomization, defined as a score of 0 to 2 on the mRS. To ensure the reliability, evaluability, and traceability of

226 the mRS score, we keep patients' video or voice version of follow-up at 90 days except those who die or refuse  
227 to take a video. The primary functional outcome is centrally assessed by two independent certified neurologists  
228 in a blinded manner by the use of the video or voice recording. Disagreements are resolved by consensus.

## 229 **8.2. Secondary Efficacy Outcomes**

- 230 (1) Shift in the distribution of mRS scores at 90 days in EVT alone versus rt-PA plus EVT (ordinal shift  
231 analysis);
- 232 (2) Proportion of mRS score 0 to 1 at 90 days;
- 233 (3) Successful recanalization proportion immediate after EVT. Successful recanalization is defined as a  
234 modified Treatment in Cerebral Infarction score of 2b (50 to 99% reperfusion) or 3 (complete reperfusion)  
235 in the post-procedure angiography<sup>16</sup>;
- 236 (4) Vessel recanalization rate evaluated by CTA or MRA within 48 hours;
- 237 (5) The change of the National Institutes of Health Stroke Scale (NIHSS) score at 24 hours from baseline<sup>17</sup>;
- 238 (6) The change of the NIHSS score at 5-7 days or discharge if earlier from baseline;
- 239 (7) European Quality Five Dimensions (EQ-5D) scale score at 90 days.

## 240 **8.3 Safety Outcomes**

- 241 (1) Symptomatic intracerebral hemorrhage (sICH) rate within 48 hours. ICH will be evaluated according to the  
242 Heidelberg Bleeding Classification<sup>18</sup>. sICH was diagnosed if the new observed ICH was associated with  
243 any of the following conditions: 1) NIHSS score increased more than 4 points than that immediately before  
244 worsening; 2) NIHSS score increased more than 2 points in one category; 3) Deterioration led to intubation,  
245 hemicraniectomy, external ventricular drain placement or any other major interventions. Additionally, the  
246 symptom deteriorations could not be explained by causes other than the observed ICH. Hemicraniectomy  
247 will be defined as that surgical procedure used to decompress the swollen hemisphere;
- 248 (2) Mortality at 90 days. Mortality rates are defined as the number of deaths observed divided by the number of  
249 subject observed over the 90-day study period.
- 250 (3) Procedure-related complications such as arterial perforation, iatrogenic arterial dissection, embolization in  
251 previously uninvolved vascular territory, arterial access site hematoma, and retroperitoneal hematoma.  
252 Arterial perforation will be defined at angiography by the operator and associated with subarachnoid  
253 hemorrhage. Iatrogenic arterial dissection will be defined at angiography by the operator. Arterial access  
254 site hematoma will be assessed as a complication of arterial access puncture and defined by clinical  
255 examination and anatomic imaging. Retroperitoneal hematoma will be assessed as a complication of groin  
256 puncture and defined by imaging (ultrasound or CTA or MR). The definition of embolization in previously  
257 uninvolved vascular territory is noted after recanalization of the primary occlusion site, any vessel  
258 occlusions distal from the primary occlusion site were considered emboli due to periprocedural thrombus  
259 fragmentation.
- 260 (4) Incidence of serious adverse events.

261

## 262 **9. BLINDING AND MASKING**

263 Each site will designate one or more physician(s) to perform the follow-up evaluation at 24 hours, 5-7 days or  
264 discharge if earlier and at 90 days who cannot be involved in care of the subjects and must remain blinded to  
265 treatment assignment of each subject.

266 Regarding the NIHSS examination at baseline, 24 hours, 5-7 days or discharge if earlier and the primary  
267 end-point, first, a local independent neurologist, not involved in the trial patient management, will evaluate the  
268 scores in a face to face clinical visit, recording the examination by video with the consent of patient or the legal  
269 representative; and second, two experienced and certified physicians will centrally evaluate the score by using

270 the video recording. For cases with disagreement between the two assessors, decisions were made by the third  
271 experienced neurologist.

272 All neuroimaging end-points including baseline Alberta Stroke Program Early Computed Tomography Score  
273 (ASPECTS) score, recanalization within 48 hours, collateral circulation classification and hemorrhage will be  
274 determined by the CT/MR core laboratory, which will be also blinded to treatment allocation. Another  
275 independent angiographic core lab will review angiographic images from the procedure to determine clot  
276 location and recanalization. Serious adverse events (SAEs) and procedure-related complications will be reviewed  
277 and adjudicated by two individuals of the independent clinical events committee who will be blinded to  
278 treatment allocation.

279

## 280 **10. ASSESSMENT OF EFFICACY**

### 281 **10.1. The Modified Rankin Scale**

282 The mRS is a valid and reliable clinician-reported measure of global disability that has been widely applied for  
283 evaluating recovery from stroke. It is a scale used to measure functional recovery (the degree of disability or  
284 dependence in daily activities) of people who have suffered a stroke<sup>19,20</sup>. mRS scores range from 0 to 6, with 0  
285 indicating no residual symptoms; 5 indicating bedbound, requiring constant care; and 6 indicating death. The  
286 mRS will be obtained at Day 90. Premorbid mRS status will also be obtained retrospectively-at 24 Hours. The  
287 mRS will only be scored by those trained and certified in the use of this scale.

### 288 **10.2. The National Institutes of Health Stroke Scale**

289 The NIHSS is a standardized neurological examination score that is a valid and reliable measure of disability and  
290 recovery after acute stroke<sup>17</sup>. Scores range from 0 to 42, with higher scores indicating increasing severity. The  
291 scale includes measures of level of consciousness, extra ocular movements, motor and sensory tests,  
292 coordination, language and speech evaluations. The NIHSS will be administered at Baseline, at 24 hours from  
293 baseline, Day 5-7or discharge. The NIHSS will only be scored by those trained and certified in the use of this  
294 scale.

### 295 **10.3. EQ-5D**

296 The EQ-5D is a generic instrument for describing and valuing health. It is based on a descriptive system that  
297 defines health in terms of five dimensions: Mobility, Self-Care, Usual Activities, Pain/Discomfort, and  
298 Anxiety/Depression<sup>21</sup>. Each dimension has five response categories corresponding to: no problems, slight,  
299 moderate, severe and extreme problems<sup>22</sup>. The instrument is designed for self-completion, and respondents also  
300 rate their overall health on the day of the interview on a 0-100 hash-marked, vertical visual analogue scale. The  
301 EQ- 5D will be administered on Day 90 by those trained in the use of this scale.

302

## 303 **11. ASSESSMENT OF SAFETY**

### 304 **11.1. Adverse Event Definitions**

#### 305 **11.1.1. Adverse Event**

306 An adverse event (AE) is any untoward medical occurrence in a patient or clinical investigation subject  
307 administered a pharmaceutical product and which does not necessarily have to have a causal relationship with  
308 this treatment. An AE can therefore be any unfavorable and unintended sign (including an abnormal laboratory  
309 finding, for example), symptom or disease temporally associated with the use of a medicinal product, whether or  
310 not considered related to the medicinal product.

311 Therefore, an AE may be: A new illness; The worsening of a concomitant illness; An effect of vaccination,  
312 including the comparator; A combination of the above.

313 Pre-existing medical conditions are not to be reported as AEs. However, if a pre-existing condition worsens in  
314 frequency or intensity, or if in the assessment of the treating physician there is a change in its clinical

315 significance, this change should be reported as an AE (exacerbation). This applies equally to recurring episodes  
316 of pre-existing conditions (e.g., asthma) if the frequency or intensity increases post-randomization.

### 317 11.1.2. Serious Adverse Event

318 A serious adverse event (SAE) is any untoward medical occurrence that at any dose: Result in death; Are  
319 life-threatening; Require or prolong inpatient hospitalization; Result in persistent or significant  
320 disability/incapacity, or; Are a congenital/birth defect.

321 A SAE can also be an important medical event that may not result in death, be life-threatening, or require  
322 hospitalization, but may jeopardize the subject and may require medical or surgical intervention to prevent one  
323 of the outcomes listed in this definition. For example, any new diagnosis of cancer (made after study enrollment)  
324 is considered an important medical event. Because our primary safety outcomes for the trial are also SAEs by  
325 definition, they will be reported dually as SAEs and as outcomes. SAEs should be managed according to the best  
326 current standard of care.

327 All deaths occurring during the follow up to Day 90 will be reported as an SAE. When reporting a death, the  
328 event or condition that caused or contributed to the fatal outcome should be reported as a single medical concept.  
329 AE occurring within 30 days of randomization and all SAEs will be reported in the CRF. Severity and  
330 relationship definitions are presented below.

### 331 11.2. Definitions of AE-Related Terms

| AE Severity     |                                                                                                                                                                                                                                                                 |
|-----------------|-----------------------------------------------------------------------------------------------------------------------------------------------------------------------------------------------------------------------------------------------------------------|
| Mild            | Awareness of sign or symptom but easily tolerated                                                                                                                                                                                                               |
| Moderate        | Discomfort sufficient to cause interference with normal activities.                                                                                                                                                                                             |
| Severe          | Incapacitating, with inability to perform normal activities.                                                                                                                                                                                                    |
| AE Relationship |                                                                                                                                                                                                                                                                 |
| Related         | A clinical event, including laboratory test abnormality, where there is a “reasonable possibility” that the SAE was caused by the study drug, meaning that there is evidence or arguments to suggest a causal relationship.                                     |
| Probably        | A clinical event, including laboratory test abnormality, with a reasonable time sequence to drug administration, unlikely to be attributed to concurrent disease or other drugs or chemicals, and which follows a clinically reasonable response on withdrawal. |
| Possibly        | A clinical event, including laboratory test abnormality, with a reasonable time sequence to drug administration, but which could also be explained by concurrent disease or other drugs or chemicals. Information on drug withdrawal may be lacking or unclear. |
| Unrelated       | This category is applicable to AEs which are judged to be clearly and incontrovertibly due to extraneous causes (diseases, environment, etc.) and do not meet the criteria for drug relationship listed for the above-mentioned conditions.                     |

332

## 333 12. CLINICAL MANAGEMENT OF ADVERSE EVENTS

### 334 12.1. Identification of Adverse Events by the Investigator

335 AE monitoring and reporting will be followed-up until Day 30. SAEs will be followed through the final study  
336 exit visit (Day 90 Visit or death or end of study whichever is sooner) or until the subject is deemed “lost to  
337 follow-up”.

338 AE identification while the subject is admitted to the acute stroke hospital will be collected via acute stroke  
339 hospital patient records and verbal histories from the subject or legally authorized representative (LAR). For



340 follow up visits after discharge from the acute stroke hospital the subject (or LAR if the subject is not able to  
341 respond to the questions) will be asked about the occurrence of AEs since the last contact, and if available, from  
342 records at the acute stroke hospital. AEs that were ongoing at the last contact will be updated with a stop date or  
343 confirmed as ongoing. AE collection will continue until Day 30, and SAE to Day 90 or the final contact.

344 A consistent methodology of eliciting AEs at all subject evaluation timepoints will be used. Non-directive  
345 questions include: How have you felt since your last clinical visit/hospital discharge? Have you had any new or  
346 changed health problems since you were last here? Have you had any unusual or unexpected worsening of your  
347 underlying medical condition or overall health? Have there been any changes in the medicines you take since  
348 your last clinical visit/hospital discharge?

349 Diagnosis versus signs and symptoms for the purpose of AE reporting: if known at the time of reporting, a  
350 diagnosis should be reported rather than individual signs and symptoms. However, if a constellation of signs  
351 and/or symptoms cannot be medically characterized as a single diagnosis it is acceptable to report the  
352 information that is ultimately available.

### 353 **12.2. Reporting of Adverse Events**

354 AEs should be reported as they occur on the electronic Case Report Form (e-CRF). Documentation must be  
355 supported by an entry in the subject's file. Each event should be described in detail along with start and stop  
356 dates, severity, relationship to investigational product as judged by the investigator, action taken and outcome.

### 357 **12.3. Reporting of Serious Adverse Events**

358 In order to comply with current regulations on SAE reporting to health authorities, the investigator must  
359 document all SAEs regardless of causal relationship and notify the Sponsor. The Investigator will give access  
360 and provide the Sponsor with all necessary information to allow the Sponsor to conduct a detailed analysis of the  
361 safety of the investigational product. It is the responsibility of the Investigator to request all necessary  
362 documentation (e.g., medical records, discharge summary, autopsy) in order to provide comprehensive safety  
363 information. All relevant information must then be transcribed into the e-SAE Form.

### 364 **12.4. Reporting by the Investigator**

365 All SAEs must be reported to the Sponsor within 24 hours of the local Investigator's first awareness of its  
366 occurrence. SAEs will be reviewed by the trial medical monitor.

367 The investigator will report the SAEs using the e-SAE form in the e-CRF, which will send an immediate alert to  
368 the Sponsor. If the e-CRF system is not available, a paper SAE form should be directed within 24 hours.

### 369 **12.5. Reporting SAEs to the Health Authorities and Ethics Committees**

370 The Sponsor will inform the relevant health authorities of any reportable SAEs according to the local regulatory  
371 requirements. Reporting to the health authorities will be according to the Sponsor's standard operating  
372 procedures.

373 SAEs that are assessed by the Sponsor to be unexpected and related to study drug (expedited reporting SAEs)  
374 will be reported to the regulatory agencies as per country requirements. All other SAEs will be reported to  
375 regulatory agencies based upon local reporting requirements.

376 The Sponsor's medical monitor or designee will notify the investigators in writing of the occurrence of any  
377 reportable SAEs. The Sponsor or delegate will be responsible for reporting suspected unexpected serious adverse  
378 reaction to any Central Ethics Committees in compliance with local current legislation. The investigators will be  
379 responsible for informing their local ethics committees of any reportable SAEs as per their local requirements.

380

## 381 **13. DATA SAFETY MONITORING BOARD**

382 The independent Data safety monitoring board (DSMB) will be composed of an experienced neurologist, an  
383 interventionalist, and a biostatistician, which are not involved in the trial. The DSMB will meet at least once a  
384 year, and is provided with structured unmasked reports, prepared by the trial statistician, for their reference only.

385 DSMB is responsible for recommendations to the executive committee regarding stopping or extending the trial.  
386 In addition, the DSMB will review the occurrence of SAEs and make recommendations to the executive  
387 committee regarding safety of the trial.

388

#### 389 **14. IMAGING CORE LABORATORY**

390 Centralized imaging core laboratories will be used in this trial to provide consistent assessment of all the images.  
391 CT/MR and angiographic images will be independently reviewed by two independent central imaging core  
392 laboratories respectively. CT/MR core laboratory will review CT/MR images obtained at baseline and within 24  
393 hours for confirmation of inclusion criteria, ASPECTS score, collateral circulation classification, and  
394 presence/absence of hemorrhage. Angiographic core laboratory will review angiographic images from the  
395 procedure to determine clot location and recanalization. CT/MR core laboratory will be independent from the  
396 angiographic core laboratory to ensure the CT/MR core laboratory is blinded to the treatment allocation.

397

#### 398 **15. CLINICAL EVENTS COMMITTEE**

399 The Clinical events committee (CEC) will be comprised of three expert physicians independent of the  
400 investigational sites. This committee will validate all the complications that occur over the course of the study  
401 and categorized for severity and relatedness according to the definition in the Adverse Event section in the CEC  
402 Manual of Operations. The CEC can request any additional source information and images supporting the  
403 adverse events to assist with the adjudication.

404

#### 405 **16. STATISTICS**

##### 406 **16.1. Sample size estimates**

407 According to the previous study data<sup>12,23-25</sup>, we hypothesis that the 90-day follow-up proportion of independent  
408 functional outcome is 43% both in the primary-thrombectomy group and bridging-therapy group. The clinically  
409 relevant non-inferiority margin  $\Delta$  was -10.0%. To maintain the alpha, Pocock Analog Alpha Spending Function  
410 is used. Sample size and power are computed incorporating a five-look group-sequential analysis plan with a  
411 one-sided  $\alpha$  at 0.025, 918 cases provide 80% power for testing the primary hypothesis of this trial; assuming the  
412 attrition rate is 5% for the primary end-point, the total sample size is up to 970. The evaluable sample size is 194  
413 at each interim analysis. Therefore, in each interim analysis, 97 cases should be enrolled in each treatment group.

##### 414 **16.2. Analysis Populations**

###### 415 **16.2.1. Intention-to-treat Population**

416 The primary efficacy analysis will be conducted in the intention-to-treat (ITT) population, defined as all subjects  
417 randomized into the trial with grouping by randomized treatment, regardless of treatment actually received.  
418 Deceased subject will be included in the ITT population with a mRS score of 6.

###### 419 **16.2.2. Per Protocol Population**

420 The primary analysis will be repeated on the Per Protocol (PP) population, defined to be all subjects randomized  
421 and treated, with no major protocol deviations. This population will be determined via blinded review of  
422 protocol deviations at the end of the trial before database lock and unblinding. Prior to unblinding, the imaging  
423 from each subject at the time of inclusion will be adjudicated to determine whether they have met the criteria for  
424 endovascular intervention, and hence for the trial. This will include review of baseline NCCT and CTA. Subjects  
425 who do not meet the imaging criteria outlined in the trial inclusion/exclusion criteria, will not be included in the  
426 Per Protocol (PP) population.

427 Patients who withdraw informed consent immediately after randomization and are not to receive any treatment  
428 should be excluded from all analysis populations.

###### 429 **16.3. Analysis of Primary Efficacy Outcome**

430 Non-inferiority test will be used to test the primary hypothesis that the proportion of patients with independent  
431 functional outcome will be non-inferior in the primary-thrombectomy group compared to the bridging-therapy  
432 group. We desired a maximum of 5 looks when approximately 20, 40, 60, 80, and 100% of the total sample size  
433 finish the follow-up, monitoring and data cleaning processes. A group-sequential test strategy was designed to  
434 have reasonable chances of stopping as early as possible, either because of efficacy or safety reasons. The  
435 independent DSMB may recommend stopping the trial either for effectiveness, or safety in case the stopping  
436 boundaries are crossed at interim analysis. For shedding cases, follow-up will be performed until the end of the  
437 study, and the results will be included in the final analysis. Statistical analysis will be performed on the SAS 9.3  
438 system. Details of these are provided in the Statistical Analysis Plan.

#### 439 **16.4. Analysis of secondary efficacy outcomes**

440 The key secondary outcomes will be tested in the following order:

- 441 1.The Proportion of mRS score 0 to 1 at 90 days;
- 442 2.Shift in the distribution of mRS scores at 90 days in EVT alone versus rt-PA plus EVT (ordinal shift analysis);
- 443 3.Successful recanalization proportion immediate after EVT.
- 444 4.Vessel recanalization rate evaluated by CTA or MRA within 48 hours;
- 445 5.The change of the National Institutes of Health Stroke Scale (NIHSS) score at 24 hours from baseline;
- 446 6.The change of the NIHSS score at 5-7 days or discharge if earlier from baseline;
- 447 7.European Quality Five Dimensions (EQ-5D) scale score at 90 days.

#### 448 **16.5. Adjustment for covariates and subgroup analyses**

449 In addition to the primary and secondary analyses adjusting for age, sex, baseline NIHSS score, baseline  
450 ASPECTS score, occlusion location, exploratory analyses will be conducted to determine the potential roles of  
451 common baseline characteristics and assess potential heterogeneity of treatment effect across subgroups. Specific  
452 subgroups of interest include the age  $\geq 70$  vs.  $< 70$  years old, male vs. female, subject with different baseline  
453 stroke severity (on NIHSS and measured radiologically on ASPECTS), baseline occlusion location (ICA  
454 occlusion: no vs. yes), cause of stroke, onset to randomization time. Full details will be specified in detail in the  
455 Statistical Analysis Plan.

#### 456 **16.6. Handling of Missing Data**

457 Every effort will be made to keep missing data, particularly the Day 90 outcome assessments, to a minimum.  
458 However, some missing data may be inevitable due to, for example, loss to follow-up. Deceased subject will  
459 score 6 on the mRS and be counted as non-responders. For the primary analysis for regulatory submission, we  
460 will assume that subject missing the primary endpoint data will be considered to be non-responders. Sensitivity  
461 analyses using various imputation techniques will be specified prospectively in the Statistical Analysis Plan  
462 before the database lock for the interim analysis if more than 5% of subject randomized are missing the primary  
463 endpoint.

#### 464 **16.7. Analyses of Safety**

465 The main analyses will be frequency of sICH and 90-day mortality. It is expected that the safety population and  
466 the ITT population will be near-identical. Full details will be specified in detail in the Statistical Analysis Plan.

467

### 468 **17. DIRECT ACCESS TO SOURCE DATA/DOCUMENTS**

469 The sponsor or delegate will be permitted to visit the study facilities at any reasonable time in order to maintain  
470 current, detailed knowledge of the study through review of the records, source documents, observation, and  
471 discussion of the conduct and progress of the study. In addition, the sponsor will maintain regular telephone and  
472 written communication with all investigators through the coordinating center. The sponsor (or delegate) will be  
473 given complete access to all components of the study facility that pertain to the conduct of this study, and may be  
474 present to observe any aspect of the conduct of the study by medical and paramedical staff, including but not

475 limited to drug preparations, dosing, sample collections, and clinical observations. E-CRFs will be monitored  
476 with sufficient frequency to assess the following: Subject randomization, compliance with protocol procedures,  
477 the completeness and accuracy of data entered into the e-CRFs, verification of e-CRF data against original  
478 source documents, and occurrence of AEs. Adequate time and all documents for these monitoring visits must be  
479 made available by the investigators. The investigators will permit trial-related monitoring, audits, REB/IRB  
480 review, and regulatory inspections, providing direct access to source data/documents.

481

## 482 **18. QUALITY CONTROL AND QUALITY ASSURANCE**

483 To ensure monitoring responsibilities are performed to the fullest extent possible, industry experienced study  
484 monitors will perform on site data verification for the trial. All data monitored on site are verified for accuracy  
485 and completeness using source documents for all subjects. In addition, 100% of subjects enrolled are monitored  
486 for the presence of signed consent.

487 Monitoring of the investigational sites will be conducted by the sponsor or contracted to a qualified clinical  
488 research organization. The sponsor will determine the extent, nature, and frequency of on-site visits that are  
489 needed to ensure that the study is being conducted in accordance with the approved protocol (and any  
490 amendments), Good Clinical Practice (GCP), and all applicable regulatory requirements. At site visits, the  
491 monitor will, as required, assess the progress of the study; check that the study data chosen for verification are  
492 authentic, accurate, and complete; verify that the safety and rights of patients are being protected; compare  
493 original documents with data entered into the study database; and identify any issues and address their  
494 resolution.

495 The investigator agrees to allow the monitor(s) direct access to all relevant documents, and to allocate his/her  
496 time and the time of staff to discuss findings, corrective actions and any relevant issues. In addition to contacts  
497 during the study, the monitor may also contact the site prior to the start of the study to discuss the protocol and  
498 data collection procedures with site personnel.

499 Additional on-site monitoring verification includes: ongoing evaluation of the adequacy of site facilities and staff,  
500 site recruitment, subject randomization, the presence of regulatory documents, and specific review of documents  
501 and data. The initial performance-monitoring visit to a site takes place after the initial subject(s) are enrolled and  
502 will continue according to enrolment for the duration of the trial.

503 During the monitoring visit, any omissions and corrections to data submitted to the database will be noted and  
504 queries will be generated by the monitor and resolved by the site.

505 The close-out monitoring visit by the monitor will take place at the completion of subject enrollment and  
506 protocol required follow-up visits at the performance site. At that visit, the monitor will again review the  
507 presence of a regulatory file and verify documents for currency and completion as directed by the clinical  
508 research unit. Sites will be instructed in the record retention of all trial documents. Principal Investigators are  
509 directed to close the trial and issue a final report to the institutional review board. Finally, any additional special  
510 considerations for the auditing of any additional safety issues are made during this final monitoring visit.

511 Except for an emergency situation in which proper care for the protection, safety and well- being of the study  
512 subjects requires medical treatment, the study will be conducted as described in the approved protocol,  
513 International Conference on Harmonization-Good Clinical Practice (ICH-GCP), Standard Operating Procedures  
514 (SOPs) and regulatory requirements. All medical treatments will be recorded. Any deviation(s) from the protocol  
515 will be recorded and presented in the final clinical study report.

### 516 **18.1. Audits and Inspections**

517 In accordance with the principles of ICH-GCP, the study site may be inspected by regulatory authorities. Quality  
518 Assurance (QA) or their designates. The investigator and relevant clinical support staff will be required to be

519 actively involved in audits and inspections, including staff interviews, and to make all necessary documentation  
520 and data available upon request.

521 During the course of the study and/or after it has been completed, one or more investigator site audits may be  
522 undertaken by auditors. The purpose of these audits is to determine whether or not the study is being/has been  
523 conducted and monitored in compliance with recognized ICH-GCP, protocol and approved amendment  
524 requirements, applicable local SOPs, and local laws and regulations. It is the responsibility of the investigator  
525 and site staff to promptly address any deficiencies stemming out of regulatory inspections and delegate audits,  
526 and to ensure that agreed-upon corrective and preventive actions are implemented as soon as possible. An  
527 inspection by any regulatory authority may occur at any time during or after completion of the study.

## 528 **18.2. Protocol Amendments and Revisions**

529 Should amendments and/or revisions to the protocol be required, they will be originated and documented by the  
530 sponsor. All amendments and/or revisions will be made in compliance with sponsor SOPs. All amendments will  
531 be submitted to the research ethics board/Institutional Review Board (REB/IRB) for approval prior to  
532 implementation. It is the sponsor's responsibility to submit all revisions and amendments to regulatory  
533 authorities when necessary.

534

## 535 **19. ETHICAL CONSIDERATION**

536 This research followed the ethical principles of the Helsinki Declaration. This protocol and the consent forms  
537 will be submitted to each hospital's REB/IRB. Before initiation of the study, a copy of the REB/IRBs' approval  
538 letters will be provided to the sponsor and the membership list of the REB/IRB will be kept on file. To make  
539 sure the subjects fully understand about this trial, the investigators must provide the patients or their legal  
540 representatives with detailed information about the clinical trial, including the purpose of the trial, possible  
541 benefits and risks, and the rights/obligations. Subjects have the right to withdraw from the study at any time if  
542 they wish to do so. The privacy protection of subjects has to be ensured. The patients or their legal  
543 representatives give their written informed consent prior to the study. Each patient must leave contact  
544 information to the investigator of the participating center. At the same time, the investigator must leave his own  
545 phone number to the patient so that the patient can find the investigator at any time. Ethical approval for the  
546 study was obtained by the Ethics Committee of the participating centers. SAEs will be reported to the REB/IRB  
547 according to their requirements.

548

## 549 **20. DATA HANDLING AND RECORD KEEPING**

### 550 **20.1. Data Handling**

551 During the trial, clinical data reported in the e-CRFs will be integrated into the clinical database under the  
552 responsibility of the Sponsor or their qualified representative. Quality control in the form of computerized logic  
553 and/or consistency checks will be systematically applied in order to detect errors or omissions. In addition, safety  
554 reviews may be performed several times by the Sponsor's staff in the course of the trial. Any questions  
555 pertaining to the reported clinical data will be submitted to the investigator for resolution. Each step of this  
556 process will be monitored through the implementation of individual passwords to maintain appropriate database  
557 access and to ensure database integrity.

558 After integration of all corrections in the complete set of data, the database will be released for statistical  
559 analysis.

### 560 **20.2. Investigator Files/Retention of Documents**

561 The investigator must maintain adequate and accurate records to enable the conduct of the study to be fully  
562 documented and the study data to be subsequently verified. These documents should be classified into two  
563 different separate categories: Investigator's Study File; and Subject Clinical Source Documents.

564 The Investigator's Study File will contain the Protocol/Amendments, CRFs, REB/IRB and governmental  
565 approval with correspondence, all versions of ethics approved informed consent forms, staff curriculum vitae  
566 and authorization forms and other appropriate documents/correspondence, etc.

567 Subject clinical source documents (usually defined by the project in advance to record efficacy/safety parameters  
568 independent of the CRFs) would include subject hospital/clinic records, physician's and nurse's notes,  
569 appointment book, original laboratory reports, ECG, image data, signed consent forms, consultant letters, and  
570 source worksheets. The investigator must keep these two categories of documents on file according to local  
571 clinical trial regulation.

572 The Investigator and the sponsor will maintain the records of disposition of the drug and the clinic records in  
573 accordance with ICH-GCP and each applicable regulatory agency. Clinic records will be retained at the site until  
574 informed by the sponsor to destroy the documents. If the clinical study must be terminated for any reason, the  
575 investigator will return all study materials to the sponsor and provide a written statement as to why the  
576 termination has taken place and notify the REB/IRB.

### 577 **20.3. Source Documents and Background Data**

578 Any investigators shall supply the sponsor, upon request, with any required background data from the study  
579 documentation or clinic records. This is particularly important when e-CRFs are illegible or when errors in data  
580 transcription are suspected. In case of special problems and/or governmental queries or requests for audit  
581 inspections, it is also necessary to have access to the complete study records, provided that subject  
582 confidentiality is protected.

### 583 **20.4. Case Report Forms**

584 For each subject randomized, an e-CRF must be completed and signed by the investigator. If a subject withdraws  
585 from the study, the reason must be noted on the CRF. All forms should be completed within five business days  
586 of subject visit. All corrections will be tracked in the e-CRF audit trail. The Investigator should ensure the  
587 accuracy, completeness, legibility, and timeliness of the data reported to the sponsor in the CRFs and in all  
588 required reports.

### 589 **20.5. Confidentiality**

590 All imaging, evaluation forms, reports, and other records that leave the site are identified only by the site and  
591 subject number to maintain subject confidentiality. All records are kept in a locked file cabinet. Clinical  
592 information is not released without written permission of the subject, except as necessary for monitoring by  
593 REB/IRB, health authorities, the sponsor, or the sponsor's designee.

594 All study investigators at the clinical sites must ensure that the confidentiality of personal identity and all  
595 personal medical information of study subjects are maintained at all times. clinical sites must conform to local  
596 privacy and confidentiality law and custom. On the CRFs and other study documents or image materials  
597 submitted to the CRU, the subjects are identified only by study identification codes.

598 Personal medical information may be reviewed for the purpose of verifying data recorded in the CRF by the site  
599 monitors. Other properly authorized persons, such as the regulatory authorities, may also have access to these  
600 records. Personal medical information is always treated as confidential.

601

## 602 **21. PUBLICATION AND PRESENTATION POLICY**

603 A trial executive committee shall be formed, and include at least the trial principal investigator and co-principal  
604 investigator, the statistical consultant, and representatives of the Sponsor. The trial executive committee will be  
605 co-authors on all publications and presentations. The primary author list for the primary publication will consist  
606 of the executive committee and the site principal/qualified investigator at each of the sites. A formal publication  
607 policy will be presented and developed by the trial executive.

608

**609 22. DATA-SHARING PLAN**

610 The sponsor will permit any and all academic publications arising from the trial data provided that no publication  
611 containing unblinded trial data precedes publication of the overall trial results in a peer-review journal, and are  
612 (1) approved by the trial executive committee and (2) the publication authors notify the sponsor at least 30 days  
613 prior to submittal for publication with a copy of such proposed publication for the sponsor's review and  
614 comment. Employees or consultants of the sponsor will only be named as authors in any such publication if the  
615 parties agree that it is appropriate under the usual conventions used by academic institutions for naming authors  
616 in scientific publications. Upon request of the sponsor the publication or disclosure shall be delayed for up to 60  
617 days in order to allow for the filing of a patent application. The Executive Committee will make the trial results  
618 available as free-access using PubMed and on Chinese Clinical Trials Registry. ([www.chictr.org.cn](http://www.chictr.org.cn)).

619

**620 23. STUDY ORGANIZATION AND FUNDING**

621 DEVT trial is an investigator-initiated study which is organized by the second affiliated hospital of the Third  
622 Military Medical University and conducted in about 30 comprehensive stroke centers in China. The authors  
623 disclosed receipt of the following financial support: (1) National Science Fund for Distinguished Young Scholars  
624 (No. 81525008), and (2) Major clinical innovation technology project of the Second Affiliated Hospital of the  
625 Army Military Medical University (No. 2018JSLC0017). The funders had no involvement in the study design,  
626 data collection, analysis and interpretation, writing or decision to submit the paper.

627

**628 Appendix 1 – Classification of Subtype of Acute Ischemic Stroke**

629 The TOAST classification system includes five categories: 1) large-artery atherosclerosis, 2) cardioembolism, 3)  
630 small-artery occlusion (lacunae), 4) stroke of other determined etiology, and 5) stroke of undetermined etiology  
631 (Table 1)<sup>26</sup>. Diagnoses are based on clinical features and on data collected by tests such as brain imaging  
632 (CT/MRI), cardiac imaging (echocardiography, etc.), duplex imaging of extracranial arteries, arteriography, and  
633 laboratory assessments for a pro-thrombotic state.

634 The physician can apply the clinical and imaging findings when first assessing the patient and then consider the  
635 results of other diagnostic tests later. An important part of the classification is the ability of the physician to  
636 categorize a specific subtype diagnosis as probable or possible based on the degree of certainty. A "probable"  
637 diagnosis is made if the clinical findings, neuroimaging data, and results of diagnostic studies are consistent with  
638 one subtype and other etiologies have been excluded. A "possible" diagnosis is made when the clinical findings  
639 and neuroimaging data suggest a specific subtype but other studies are not done. Because many patients will  
640 have a limited number of diagnostic tests, the probable and possible subcategorizations allow the physician to  
641 make as precise a subgroup diagnosis as can be achieved.

**642 Large artery atherosclerosis**

643 These patients will have clinical and brain imaging findings of either significant (>50%) stenosis or occlusion of  
644 a major brain artery or branch cortical artery, presumably due to atherosclerosis (Table 2). Clinical findings  
645 include those of cerebral cortical impairment (aphasia, neglect, restricted motor involvement, etc.) or brain stem  
646 or cerebellar dysfunction. A history of intermittent claudication, transient ischemic attacks (TIAs) in the same  
647 vascular territory, a carotid bruit, or diminished pulses helps support the clinical diagnosis. Cortical or cerebellar  
648 lesions and brain stem or subcortical hemispheric infarcts greater than 1.5 cm in diameter on CT or MRI are  
649 considered to be of potential large-artery atherosclerotic origin. Supportive evidence by duplex imaging or  
650 arteriography of a stenosis of greater than 50% of an appropriate intracranial or extracranial artery is needed.  
651 Diagnostic studies should exclude potential sources of cardiogenic embolism. The diagnosis of stroke secondary  
652 to large artery atherosclerosis cannot be made if duplex or arteriographic studies are normal or show only  
653 minimal changes.

**654 Cardioembolism**

655 This category includes patients with arterial occlusions presumably due to an embolus arising in the heart (Table  
656 2). Cardiac sources are divided into high-risk and medium-risk groups based on the evidence of their relative  
657 propensities for embolism (Table 3). At least one cardiac source for an embolus must be identified for a possible  
658 or probable diagnosis of cardioembolic stroke. Clinical and brain imaging findings are similar to those described  
659 for large-artery atherosclerosis. Evidence of a previous TIA or stroke in more than one vascular territory or  
660 systemic embolism supports a clinical diagnosis of cardiogenic stroke. Potential large-artery atherosclerotic  
661 sources of thrombosis or embolism should be eliminated. A stroke in a patient with a medium-risk cardiac source  
662 of embolism and no other cause of stroke is classified as a possible cardioembolic stroke.

**663 Small artery occlusion (lacunae)**

664 This category includes patients whose strokes are often labeled as lacunar infarcts in other classifications (Table  
665 2). The patient should have one of the traditional clinical lacunar syndromes and should not have evidence of  
666 cerebral cortical dysfunction. A history of diabetes mellitus or hypertension supports the clinical diagnosis. The  
667 patient should also have a normal CT/MRI examination or a relevant brain stem or subcortical hemispheric  
668 lesion with a diameter of less than 1.5cm demonstrated. Potential cardiac sources for embolism should be absent,  
669 and evaluation of the large extracranial arteries should not demonstrate a stenosis of greater than 50% in an  
670 ipsilateral artery.

**671 Acute stroke of other determined etiology**



672 This category includes patients with rare causes of stroke, such as nonatherosclerotic vasculopathies,  
 673 hypercoagulable states, or hematologic disorders. Patients in this group should have clinical and CT or MRI  
 674 findings of an acute ischemic stroke, regardless of the size or location. Diagnostic studies such as blood tests or  
 675 arteriography should reveal one of these unusual causes of stroke. Cardiac sources of embolism and large-artery  
 676 atherosclerosis should be excluded by other studies.

#### 677 **Stroke of undetermined etiology**

678 In several instances, the cause of a stroke cannot be determined with any degree of confidence. Some patients  
 679 will have no likely etiology determined despite an extensive evaluation. In others, no cause is found but the  
 680 evaluation was cursory. This category also includes patients with two or more potential causes of stroke so that  
 681 the physician is unable to make a final diagnosis. For example, a patient with a medium-risk cardiac source of  
 682 embolism who also has another possible cause of stroke identified would be classified as having a stroke of  
 683 undetermined etiology. Other examples would be a patient who has atrial fibrillation and an ipsilateral stenosis  
 684 of 50%, or the patient with a traditional lacunar syndrome and an ipsilateral carotid stenosis of 50%.

685

686 **TABLE 1. TOAST Classification of Subtypes of Acute Ischemic Stroke**

|                                                    |
|----------------------------------------------------|
| Large artery atherosclerosis (embolus/thrombosis)* |
| Cardioembolism (high-risk/medium-risk)*            |
| Small-vessel occlusion (lacunae)*                  |
| Stroke of other determined etiology*               |
| Stroke of undetermined etiology                    |
| a. Two or more causes identified                   |
| b. Negative evaluation                             |
| c. Incomplete evaluation                           |

687 TOAST denotes Trial of Org 10172 in Acute Stroke Treatment.

688 \*Possible or probable depending on results of ancillary studies.

689

690 **Table 2. Features of TOAST Classification of Subtypes of Ischemic Stroke**

| Features                                                          | Subtype                      |                |                                  |             |
|-------------------------------------------------------------------|------------------------------|----------------|----------------------------------|-------------|
|                                                                   | Large artery atherosclerosis | Cardioembolism | Small artery occlusion (lacunae) | Other cause |
| <b>Clinical</b>                                                   |                              |                |                                  |             |
| Cortical or cerebellar dysfunction                                | +                            | +              | -                                | +/-         |
| Lacunar syndrome                                                  | -                            | -              | +                                | +/-         |
| <b>Imaging</b>                                                    |                              |                |                                  |             |
| Cortical, cerebellar, brain stem, or subcortical infarct > 1.5 cm | +                            | +              | -                                | +/-         |

|                                                           |   |   |     |     |
|-----------------------------------------------------------|---|---|-----|-----|
| Subcortical or<br>brain stem<br>infarct < 1.5 cm          | - | - | +/- | +/- |
| <b>Tests</b>                                              |   |   |     |     |
| Stenosis of<br>extracranial<br>internal carotid<br>artery | + | - | -   | -   |
| Cardiac source<br>of emboli                               | - | + | -   | -   |
| Other<br>abnormality on<br>tests                          | - | - | -   | +   |

691

692 **TABLE 3. TOAST Classification of High- and Medium-Risk Sources of Cardioembolism****High-risk sources**

Mechanical prosthetic valve  
 Mitral stenosis with atrial fibrillation  
 Atrial fibrillation (other than lone atrial fibrillation)  
 Left atrial/atrial appendage thrombus  
 Sick sinus syndrome  
 Recent myocardial infarction (<4 weeks)  
 Left ventricular thrombus  
 Dilated cardiomyopathy  
 Akinetic left ventricular segment  
 Atrial myxoma  
 Infective endocarditis

**Medium-risk sources**

Mitral valve prolapse  
 Mitral annulus calcification  
 Mitral stenosis without atrial fibrillation  
 Left atrial turbulence (smoke)  
 Atrial septal aneurysm  
 Patent foramen ovale  
 Atrial flutter  
 Lone atrial fibrillation  
 Bioprosthetic cardiac valve  
 Nonbacterial thrombotic endocarditis  
 Congestive heart failure  
 Hypokinetic left ventricular segment  
 Myocardial infarction (> 4 weeks, < 6 months)

693

---

**694 Appendix 2 - ASITN/SIR Collateral Vessel Grading System**

695 Collateral vessel status was evaluated by using the American Society of Interventional and Therapeutic  
696 Neuroradiology/Society of Interventional Radiology (ASITN/SIR) collateral vessel grading system<sup>27</sup>. Collateral  
697 vessel scores were categorized into ASITN/SIR grades 0 or 1, 2, and 3 or 4. The following scoring system  
698 provides a guide.

---

| Grade | Description                                                                                                                                   |
|-------|-----------------------------------------------------------------------------------------------------------------------------------------------|
| 0     | No collateral vessels visible to the ischemic site                                                                                            |
| 1     | Slow collateral vessels to the periphery of the ischemic site with persistence of some of the defect                                          |
| 2     | Rapid collateral vessels to periphery of ischemic site with persistence of some of the defect and to only a portion of the ischemic territory |
| 3     | Collateral vessels with slow but complete angiographic blood flow of the ischemic bed by the late venous phase                                |
| 4     | Complete and rapid collateral blood flow to the vascular bed in the entire ischemic territory by retrograde perfusion                         |

---

699

700

701 **Appendix 3 - The Alberta Stroke Program Early Computed Tomography Score (ASPECTS)**

702 NCCT shall be scored using ASPECTS, a 10-point score derived by examining each of 10 regions on the middle  
703 cerebral artery territory<sup>28</sup>. Ischemic change present is scored as 0; ischemic change absent is score as 1. Adding  
704 up the score gives a maximum of 10 (favorable scan) and minimum of 0 (unfavorable scan). The score is highly  
705 reliable when trichotomized into 0-4 (severe ischemic change, large core), 5-7 (moderate ischemic change) and  
706 8-10 (minimal ischemic change, small core). ASPECTS may be less reliable early in stroke (i.e. within 90  
707 minutes of onset); however, at later time windows it should be easy to recognize large areas of irreversible  
708 damage. Having a good quality scan and optimization of scanner is key to successful interpretation. Further  
709 information is available at: [ww.aspectsinstroke.com](http://ww.aspectsinstroke.com).

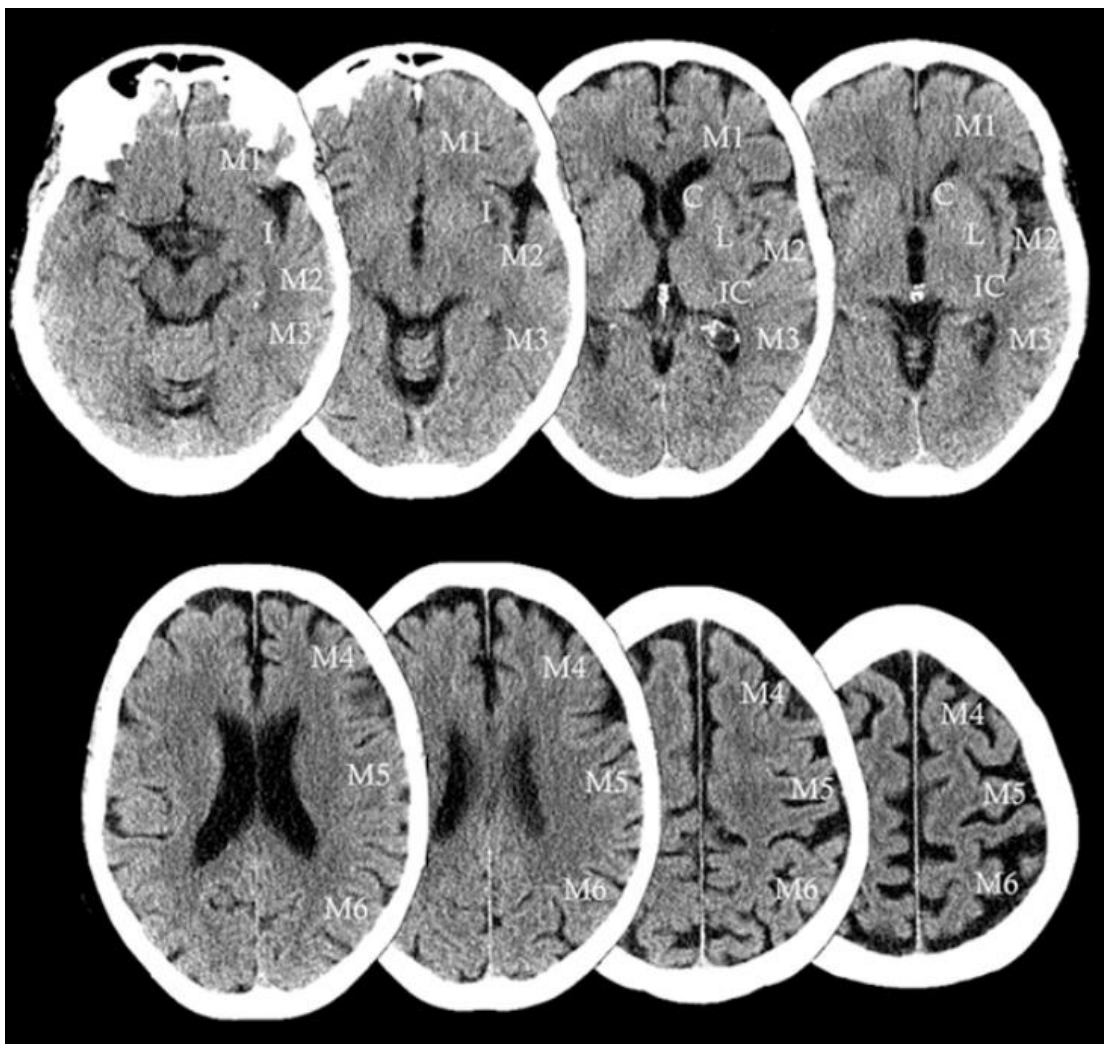

710

711

712 **Appendix 4 - Modified Rankin Scale (MRS)**

| Grade | Description <sup>29</sup>                                                                                                    |
|-------|------------------------------------------------------------------------------------------------------------------------------|
| 0     | No symptoms at all                                                                                                           |
| 1     | No significant disability despite symptoms: able to carry out all usual duties and activities                                |
| 2     | Slight disability: unable to carry out all previous activities but able to look after own affairs without assistance         |
| 3     | Moderate disability: requiring some help, but able to walk without assistance                                                |
| 4     | Moderately severe disability: unable to walk without assistance, and unable to attend to own bodily needs without assistance |
| 5     | Severe disability: bedridden, incontinent, and requiring constant nursing care and attention                                 |
| 6     | Death                                                                                                                        |

713

714

715 **Appendix 5 - Modified Treatment In Cerebral Infarction (mTICI) Score**

| Grade | Description <sup>16</sup>                                                                                                                                                              |
|-------|----------------------------------------------------------------------------------------------------------------------------------------------------------------------------------------|
| 0     | No perfusion                                                                                                                                                                           |
| 1     | Antegrade reperfusion past the initial occlusion, but limited distal branch filling with little or slow distal reperfusion                                                             |
| 2a    | Antegrade reperfusion of less than half of the occluded target artery previously ischemic territory (e.g. in one major division of the middle cerebral artery (MCA) and its territory) |
| 2b    | Antegrade reperfusion of more than half of the previously occluded target artery ischemic territory (e.g. in two major divisions of the MCA and their territories)                     |
| 3     | Complete antegrade reperfusion of the previously occluded target artery ischemic territory, with absence of visualized occlusion in all distal branches                                |

716

717

718 **Investigator’s Agreement**

719 I have read the attached protocol: a randomized, controlled, multicenter trial of Direct Endovascular treatment  
720 Versus standard bridging Therapy for acute stroke patients with large vessel occlusion in the anterior circulation  
721 (DEVT Trial), Version 1.0 dated 30th March 2018 and agree to abide by all provisions set forth therein. I agree  
722 to comply with the current International Conference on Harmonization Guidelines for Good Clinical Practice  
723 and the laws, rules, regulations and guidelines of the community, country, state or locality relating to the conduct  
724 of the clinical study. I also agree that persons debarred from conducting or working on clinical studies by any  
725 court or regulatory agency will not be allowed to conduct or work on studies for the sponsor.

726

727

728

729

730

731 Name Site Principal Investigator

Signature

732

733

734 Name of Clinical Site

Date

735

736 **REFERENCES**

- 737 1. Hacke W, Kaste M, Bluhmki E, et al. Thrombolysis with alteplase 3 to 4.5 hours after acute ischemic stroke.  
738 The New England journal of medicine 2008;359:1317-29.
- 739 2. National Institute of Neurological D, Stroke rt PASSG. Tissue plasminogen activator for acute ischemic  
740 stroke. The New England journal of medicine 1995;333:1581-7.
- 741 3. Muir KW, Ford GA, Messow C-M, et al. Endovascular therapy for acute ischaemic stroke: the Pragmatic  
742 Ischaemic Stroke Thrombectomy Evaluation (PISTE) randomised, controlled trial. Journal of neurology,  
743 neurosurgery, and psychiatry 2017;88:38-44.
- 744 4. Bracard S, Ducrocq X, Mas JL, et al. Mechanical thrombectomy after intravenous alteplase versus alteplase  
745 alone after stroke (THRACE): a randomised controlled trial. The Lancet Neurology 2016;15:1138-47.
- 746 5. Saver JL, Goyal M, Bonafe A, et al. Stent-retriever thrombectomy after intravenous t-PA vs. t-PA alone in  
747 stroke. The New England journal of medicine 2015;372:2285-95.
- 748 6. Jovin TG, Chamorro A, Cobo E, et al. Thrombectomy within 8 hours after symptom onset in ischemic stroke.  
749 The New England journal of medicine 2015;372:2296-306.
- 750 7. Goyal M, Demchuk AM, Menon BK, et al. Randomized assessment of rapid endovascular treatment of  
751 ischemic stroke. The New England journal of medicine 2015;372:1019-30.
- 752 8. Campbell BC, Mitchell PJ, Kleinig TJ, et al. Endovascular therapy for ischemic stroke with perfusion-imaging  
753 selection. The New England journal of medicine 2015;372:1009-18.
- 754 9. Berkhemer OA, Fransen PS, Beumer D, et al. A randomized trial of intraarterial treatment for acute  
755 ischemic stroke. The New England journal of medicine 2015;372:11-20.
- 756 10. Chandra RV, Lesliemazwi TM, Mehta BP, et al. Does the use of IV tPA in the current era of rapid and  
757 predictable recanalization by mechanical embolectomy represent good value. Journal of neurointerventional  
758 surgery 2016;8:443-6.
- 759 11. Grotta JC, Hacke W. Stroke Neurologist's Perspective on the New Endovascular Trials. Stroke; a journal of  
760 cerebral circulation 2015;46:1447-52.
- 761 12. Wang H, Zi W, Hao Y, et al. Direct endovascular treatment: an alternative for bridging therapy in anterior  
762 circulation large-vessel occlusion stroke. European journal of neurology : the official journal of the European  
763 Federation of Neurological Societies 2017;24:935-43.
- 764 13. Rai AT, Boo S, Buseman C, et al. Intravenous thrombolysis before endovascular therapy for large vessel  
765 strokes can lead to significantly higher hospital costs without improving outcomes. Journal of  
766 neurointerventional surgery 2018;10:17-21.
- 767 14. Mistry EA, Mistry AM, Nakawah MO, et al. Mechanical Thrombectomy Outcomes With and Without  
768 Intravenous Thrombolysis in Stroke Patients: A Meta-Analysis. Stroke; a journal of cerebral circulation  
769 2017;48:2450-6.
- 770 15. Powers WJ, Derdeyn CP, Biller J, et al. 2015 American Heart Association/American Stroke Association  
771 Focused Update of the 2013 Guidelines for the Early Management of Patients With Acute Ischemic Stroke  
772 Regarding Endovascular Treatment: A Guideline for Healthcare Professionals From the American Heart  
773 Association/American Stroke Association. Stroke; a journal of cerebral circulation 2015;46:3020-35.
- 774 16. Zaidat OO, Yoo AJ, Khatri P, et al. Recommendations on angiographic revascularization grading standards  
775 for acute ischemic stroke: a consensus statement. Stroke; a journal of cerebral circulation 2013;44:2650-63.
- 776 17. Brott T, Adams HP, Jr., Olinger CP, et al. Measurements of acute cerebral infarction: a clinical examination  
777 scale. Stroke; a journal of cerebral circulation 1989;20:864-70.
- 778 18. von Kummer R, Broderick JP, Campbell BC, et al. The Heidelberg Bleeding Classification: Classification of  
779 Bleeding Events After Ischemic Stroke and Reperfusion Therapy. Stroke; a journal of cerebral circulation



- 780 2015;46:2981-6.
- 781 19. Banks JL, Marotta CA. Outcomes validity and reliability of the modified Rankin scale: implications for stroke  
782 clinical trials: a literature review and synthesis. *Stroke; a journal of cerebral circulation* 2007;38:1091-6.
- 783 20. Quinn TJ, Dawson J, Walters MR, Lees KR. Reliability of the modified Rankin Scale: a systematic review.  
784 *Stroke; a journal of cerebral circulation* 2009;40:3393-5.
- 785 21. Brooks R. EuroQol: the current state of play. *Health Policy* 1996;37:53-72.
- 786 22. Herdman M, Gudex C, Lloyd A, et al. Development and preliminary testing of the new five-level version of  
787 EQ-5D (EQ-5D-5L). *Quality of life research : an international journal of quality of life aspects of treatment, care*  
788 *and rehabilitation* 2011;20:1727-36.
- 789 23. Broeg-Morvay A, Mordasini P, Bernasconi C, et al. Direct Mechanical Intervention Versus Combined  
790 Intravenous and Mechanical Intervention in Large Artery Anterior Circulation Stroke: A Matched-Pairs Analysis.  
791 *Stroke; a journal of cerebral circulation* 2016;47:1037-44.
- 792 24. Bellwald S, Weber R, Dobrocky T, et al. Direct Mechanical Intervention Versus Bridging Therapy in Stroke  
793 Patients Eligible for Intravenous Thrombolysis: A Pooled Analysis of 2 Registries. *Stroke; a journal of cerebral*  
794 *circulation* 2017;48:3282-8.
- 795 25. Berkhemer OA, Fransen PSS, Beumer D, et al. A randomized trial of intraarterial treatment for acute  
796 ischemic stroke. *The New England journal of medicine* 2015;372:11-20.
- 797 26. Adams HP, Jr., Bendixen BH, Kappelle LJ, et al. Classification of subtype of acute ischemic stroke.  
798 Definitions for use in a multicenter clinical trial. TOAST. Trial of Org 10172 in Acute Stroke Treatment. *Stroke; a*  
799 *journal of cerebral circulation* 1993;24:35-41.
- 800 27. Zaidat OO, Yoo AJ, Khatri P, et al. Recommendations on angiographic revascularization grading standards  
801 for acute ischemic stroke: a consensus statement. *Stroke; a journal of cerebral circulation* 2013;44:2650-63.
- 802 28. Pexman JH, Barber PA, Hill MD, et al. Use of the Alberta Stroke Program Early CT Score (ASPECTS) for  
803 assessing CT scans in patients with acute stroke. *AJNR American journal of neuroradiology* 2001;22:1534-42.
- 804 29. Bonita R, Beaglehole R. Recovery of motor function after stroke. *Stroke; a journal of cerebral circulation*  
805 *1988;19:1497-500.*
- 806
- 808

809  
810  
811  
812

**Sponsor**

Army Medical University  
No. 30 Gaotanyan Main Street, Chongqing, China

**Principle Investigators**

Professor Qingwu Yang, Jie Shuai  
Professor Raul Gomes Nogueira

813  
814  
815  
816  
817

818 **DEVT: A randomized, controlled, multicenter trial of direct endovascular treatment**  
819 **versus standard bridging therapy for acute stroke patients with large vessel occlusion in**  
820 **the anterior circulation**

821  
822

823 **Protocol Version: 2.0**

824 **Issue Date: 1st August 2019**

| 825 | <b>CONTENTS</b>                                                                   |           |
|-----|-----------------------------------------------------------------------------------|-----------|
| 826 | <b>List of Abbreviations.....</b>                                                 | <b>37</b> |
| 827 | <b>Study Synopsis.....</b>                                                        | <b>39</b> |
| 828 | <b>Schedule of Assessments .....</b>                                              | <b>42</b> |
| 829 | <b>1. BACKGROUND INFORMATION.....</b>                                             | <b>43</b> |
| 830 | <b>2. TRIAL OBJECTIVES .....</b>                                                  | <b>43</b> |
| 831 | <b>3. TRIAL DESIGN.....</b>                                                       | <b>43</b> |
| 832 | <b>4. PATIENT POPULATION .....</b>                                                | <b>44</b> |
| 833 | <b>4.1. Inclusion criteria .....</b>                                              | <b>44</b> |
| 834 | <b>4.2. Exclusion criteria.....</b>                                               | <b>44</b> |
| 835 | <b>5. PARTICIPATING CENTER ELIGIBILITY .....</b>                                  | <b>45</b> |
| 836 | <b>6. RANDOMIZATION .....</b>                                                     | <b>45</b> |
| 837 | <b>7. TREATMENTS.....</b>                                                         | <b>45</b> |
| 838 | <b>8. OUTCOMES.....</b>                                                           | <b>45</b> |
| 839 | <b>8.1. Primary Efficacy Outcome.....</b>                                         | <b>45</b> |
| 840 | <b>8.2. Secondary Efficacy Outcomes.....</b>                                      | <b>46</b> |
| 841 | <b>8.3 Safety Outcomes .....</b>                                                  | <b>46</b> |
| 842 | <b>9. BLINDING AND MASKING .....</b>                                              | <b>46</b> |
| 843 | <b>10. ASSESSMENT OF EFFICACY .....</b>                                           | <b>47</b> |
| 844 | <b>10.1. The Modified Rankin Scale .....</b>                                      | <b>47</b> |
| 845 | <b>10.2. The National Institutes of Health Stroke Scale .....</b>                 | <b>47</b> |
| 846 | <b>10.3. EQ-5D-5L.....</b>                                                        | <b>47</b> |
| 847 | <b>11. ASSESSMENT OF SAFETY .....</b>                                             | <b>47</b> |
| 848 | <b>11.1. Adverse Event Definitions .....</b>                                      | <b>47</b> |
| 849 | <b>11.1.1. Adverse Event.....</b>                                                 | <b>47</b> |
| 850 | <b>11.1.2. Serious Adverse Event .....</b>                                        | <b>48</b> |
| 851 | <b>11.2. Definitions of AE-Related Terms.....</b>                                 | <b>48</b> |
| 852 | <b>12. CLINICAL MANAGEMENT OF ADVERSE EVENTS.....</b>                             | <b>48</b> |
| 853 | <b>12.1. Identification of Adverse Events by the Investigator.....</b>            | <b>48</b> |
| 854 | <b>12.2. Reporting of Adverse Events.....</b>                                     | <b>49</b> |
| 855 | <b>12.3. Reporting of Serious Adverse Events.....</b>                             | <b>49</b> |
| 856 | <b>12.4. Reporting by the Investigator .....</b>                                  | <b>49</b> |
| 857 | <b>12.5. Reporting SAEs to the Health Authorities and Ethics Committees .....</b> | <b>49</b> |
| 858 | <b>13. DATA SAFETY MONITORING BOARD.....</b>                                      | <b>49</b> |
| 859 | <b>14. IMAGING CORE LABORATORY.....</b>                                           | <b>50</b> |
| 860 | <b>15. CLINICAL EVENTS COMMITTEE .....</b>                                        | <b>50</b> |
| 861 | <b>16. STATISTICS .....</b>                                                       | <b>50</b> |
| 862 | <b>16.1. Sample size estimates .....</b>                                          | <b>50</b> |
| 863 | <b>16.2. Analysis Populations .....</b>                                           | <b>50</b> |
| 864 | <b>16.2.1. Intention-to-treat Population .....</b>                                | <b>50</b> |
| 865 | <b>16.2.2. Per-Protocol Population.....</b>                                       | <b>50</b> |
| 866 | <b>16.3. Analysis of Primary Efficacy Outcome .....</b>                           | <b>50</b> |
| 867 | <b>16.4. Analysis of secondary efficacy outcomes.....</b>                         | <b>51</b> |
| 868 | <b>16.5. Adjustment for covariates and subgroup analyses .....</b>                | <b>51</b> |

|     |                                                                                      |    |
|-----|--------------------------------------------------------------------------------------|----|
| 869 | <b>16.6. Handling of Missing Data</b> .....                                          | 51 |
| 870 | <b>16.7. Analyses of Safety</b> .....                                                | 51 |
| 871 | <b>16.8. SAEs</b> .....                                                              | 51 |
| 872 | <b>16.9. AEs</b> .....                                                               | 52 |
| 873 | <b>17. DIRECT ACCESS TO SOURCE DATA/DOCUMENTS</b> .....                              | 52 |
| 874 | <b>18. QUALITY CONTROL AND QUALITY ASSURANCE</b> .....                               | 52 |
| 875 | <b>18.1. Audits and Inspections</b> .....                                            | 53 |
| 876 | <b>18.2. Protocol Amendments and Revisions</b> .....                                 | 53 |
| 877 | <b>19. ETHICAL CONSIDERATION</b> .....                                               | 53 |
| 878 | <b>20. DATA HANDLING AND RECORD KEEPING</b> .....                                    | 53 |
| 879 | <b>20.1. Data Handling</b> .....                                                     | 54 |
| 880 | <b>20.2. Investigator Files/Retention of Documents</b> .....                         | 54 |
| 881 | <b>20.3. Source Documents and Background Data</b> .....                              | 54 |
| 882 | <b>20.4. Case Report Forms</b> .....                                                 | 54 |
| 883 | <b>20.5. Confidentiality</b> .....                                                   | 54 |
| 884 | <b>21. PUBLICATION AND PRESENTATION POLICY</b> .....                                 | 55 |
| 885 | <b>22. DATA-SHARING PLAN</b> .....                                                   | 55 |
| 886 | <b>23. STUDY ORGANIZATION AND FUNDING</b> .....                                      | 55 |
| 887 | <b>Appendix 1 - Classification of Subtype of Acute Ischemic Stroke</b> .....         | 56 |
| 888 | <b>Appendix 2 - ASITN/SIR Collateral Vessel Grading System</b> .....                 | 59 |
| 889 | <b>Appendix 3 - The Alberta Stroke Program Early Computed Tomography Score</b>       |    |
| 890 | <b>(ASPECTS)</b> .....                                                               | 60 |
| 891 | <b>Appendix 4 - Modified Rankin Scale (MRS)</b> .....                                | 61 |
| 892 | <b>Appendix 5 - Expanded Thrombolysis In Cerebral Infarction (eTICI) Scale</b> ..... | 62 |
| 893 | <b>Investigator’s Agreement</b> .....                                                | 63 |
| 894 | <b>REFERENCES</b> .....                                                              | 64 |
| 895 |                                                                                      |    |

896 **List of Abbreviations**

|           |                                                                                                            |
|-----------|------------------------------------------------------------------------------------------------------------|
| AE        | Adverse Event                                                                                              |
| AIS       | Acute Ischemia Stroke                                                                                      |
| ASITN/SIR | American Society of Interventional and Therapeutic Neuroradiology/Society of Interventional Radiology      |
| ASPECTS   | Alberta Stroke Program Early Computed Tomography Score                                                     |
| BP        | Blood Pressure                                                                                             |
| CEC       | Clinical Events Committee                                                                                  |
| CRF       | Case Report Form                                                                                           |
| CTA       | Computed Tomographic Angiography                                                                           |
| DEVT      | Direct Endovascular Treatment Versus Standard Bridging Therapy in Large Artery Anterior Circulation Stroke |
| DSA       | Digital Subtraction Angiography                                                                            |
| DSMB      | Data Safety Monitoring Board                                                                               |
| ECG       | Electrocardiogram                                                                                          |
| EQ-5D-5L  | European Quality Five-Dimension Five-Level                                                                 |
| EVT       | Endovascular Treatment                                                                                     |
| GCP       | Good Clinical Practice                                                                                     |
| HbA1c     | Hemoglobin A1c                                                                                             |
| HCG       | Human Chorionic Gonadotropin                                                                               |
| HR        | Heart Rate                                                                                                 |
| ICA       | Internal Carotid Artery                                                                                    |
| ICH-GCP   | International Conference on Harmonization-Good Clinical Practice                                           |
| INR       | International Normalized Ratio                                                                             |
| IRB       | Institutional Review Board                                                                                 |
| ITT       | Intention-To-Treat                                                                                         |
| IVT       | Intravenous Thrombolysis                                                                                   |
| LAR       | Legally Authorized Representative                                                                          |
| LVO       | Large Vessel Occlusion                                                                                     |
| MCA       | Middle Cerebral Artery                                                                                     |
| MedDRA    | Medical Dictionary for Regulatory Activities                                                               |
| MR        | Magnetic Resonance                                                                                         |

---

|       |                                               |
|-------|-----------------------------------------------|
| MRA   | Magnetic Resonance Angiography                |
| mRS   | Modified Rankin Scale                         |
| NCCT  | Non-Contrast Computed Tomography              |
| NIHSS | National Institutes of Health Stroke Scale    |
| PP    | Per-Protocol                                  |
| QA    | Quality Assurance                             |
| RCT   | Randomized Controlled Trial                   |
| REB   | Research Ethics Board                         |
| rt-PA | Recombinant Tissue-type Plasminogen Activator |
| SAE   | Serious Adverse Event                         |
| SICH  | Symptomatic Intracranial Hemorrhage           |
| SOC   | System Organ Class                            |
| SOPs  | Standard Operating Procedures                 |
| Temp  | Temperature                                   |
| TIA   | Transient Ischemic Attack                     |
| TOAST | Trial of Org 10172 in Acute Stroke Treatment  |

898 **Study Synopsis**

|                         |                                                                                                                                                                                                                                                                                                                                                                                                                                                                                                                                                                                                                                                                                                                                                                                                                                                                                                                                                                                                                                                                                                                                                                                                                                                                                                                                                                                                                                                                                                                                                                                                                                                                                                                                                                                                                                                                                                                                                                                                                    |
|-------------------------|--------------------------------------------------------------------------------------------------------------------------------------------------------------------------------------------------------------------------------------------------------------------------------------------------------------------------------------------------------------------------------------------------------------------------------------------------------------------------------------------------------------------------------------------------------------------------------------------------------------------------------------------------------------------------------------------------------------------------------------------------------------------------------------------------------------------------------------------------------------------------------------------------------------------------------------------------------------------------------------------------------------------------------------------------------------------------------------------------------------------------------------------------------------------------------------------------------------------------------------------------------------------------------------------------------------------------------------------------------------------------------------------------------------------------------------------------------------------------------------------------------------------------------------------------------------------------------------------------------------------------------------------------------------------------------------------------------------------------------------------------------------------------------------------------------------------------------------------------------------------------------------------------------------------------------------------------------------------------------------------------------------------|
| <b>Trial Objectives</b> | The objective is to determine whether endovascular treatment alone is non-inferior to intravenous thrombolysis bridging endovascular treatment in acute anterior circulation large vessel occlusive patients who are eligible for intravenous rt-PA.                                                                                                                                                                                                                                                                                                                                                                                                                                                                                                                                                                                                                                                                                                                                                                                                                                                                                                                                                                                                                                                                                                                                                                                                                                                                                                                                                                                                                                                                                                                                                                                                                                                                                                                                                               |
| <b>Trial Design</b>     | This study is a randomized, controlled, multicenter trial with blinded outcome assessment. This trial uses a five-look group-sequential non-inferiority design. Up to 194 patients in each interim analysis will be consecutively randomized to endovascular treatment alone or rt-PA plus endovascular treatment group in 1:1 ratio over three years from about 35 hospitals in China.                                                                                                                                                                                                                                                                                                                                                                                                                                                                                                                                                                                                                                                                                                                                                                                                                                                                                                                                                                                                                                                                                                                                                                                                                                                                                                                                                                                                                                                                                                                                                                                                                            |
| <b>Subjects</b>         | <p><u>Inclusion criteria</u></p> <ol style="list-style-type: none"> <li>1) Aged 18 years or older;</li> <li>2) Presenting with acute ischemic stroke (AIS) symptom within 4.5 hours;</li> <li>3) Eligible for IV rt-PA;</li> <li>4) Occlusion of the intracranial internal carotid artery (ICA) or M1 segment of the middle cerebral artery (MCA) confirmed by CT or MR angiography (CTA or MRA);</li> <li>5) Randomization no later than 4 hours 15 minutes after stroke symptom onset;</li> <li>6) Informed consent obtained from patients or their legal representatives.</li> </ol> <p><u>Exclusion criteria</u></p> <ol style="list-style-type: none"> <li>1) CT or MR evidence of hemorrhage (the presence of micro-bleeds is allowed);</li> <li>2) Contraindications of IV rt-PA;</li> <li>3) Pre-morbidity with a modified Rankin scale (mRS) score of <math>\geq 2</math>;</li> <li>4) Currently in pregnant or lactating or serum beta human chorionic gonadotrophin (HCG) test is positive on admission;</li> <li>5) Contraindication to radiographic contrast agents, nickel, titanium metals or their alloys;</li> <li>6) Arterial tortuosity and/or other arterial disease that would prevent the device from reaching the target vessel;</li> <li>7) Patients with a preexisting neurological or psychiatric disease that would confound the neurological functional evaluations;</li> <li>8) Subjects with occlusions in multiple vascular territories (e.g. bilateral anterior circulation, or anterior/posterior circulation);</li> <li>9) CT or MRI evidence of mass effect or intracranial tumor (except small meningioma);</li> <li>10) CT or MRI evidence of cerebral vasculitis;</li> <li>11) CTA or MRA evidence of intracranial arteriovenous malformations or aneurysms;</li> <li>12) Any terminal illness with life expectancy less than 6 months;</li> <li>13) Unlikely to be available for 90-day follow-up;</li> <li>14) Current participation in another clinical trial.</li> </ol> |
| <b>Treatments</b>       | Patients are assigned to receive either endovascular treatment (EVT) alone (primary-thrombectomy group) or rt-PA plus EVT (bridging-therapy group). In the bridging-therapy group, subjects will receive a single rt-PA dose of 0.9 mg/kg IV (maximum dose: 90 mg), with 10% given as a bolus, followed by continuous IV                                                                                                                                                                                                                                                                                                                                                                                                                                                                                                                                                                                                                                                                                                                                                                                                                                                                                                                                                                                                                                                                                                                                                                                                                                                                                                                                                                                                                                                                                                                                                                                                                                                                                           |

|                               |                                                                                                                                                                                                                                                                                                                                                                                                                                                                                                                                                                                                                                                                                                                                                                                                                                                                                                                                                                                                                                                                                                                                          |
|-------------------------------|------------------------------------------------------------------------------------------------------------------------------------------------------------------------------------------------------------------------------------------------------------------------------------------------------------------------------------------------------------------------------------------------------------------------------------------------------------------------------------------------------------------------------------------------------------------------------------------------------------------------------------------------------------------------------------------------------------------------------------------------------------------------------------------------------------------------------------------------------------------------------------------------------------------------------------------------------------------------------------------------------------------------------------------------------------------------------------------------------------------------------------------|
|                               | infusion of the rest dose within 1 hour. Simultaneously, EVT preparation should be initiated with or as soon as IV rt-PA administration. While in the primary-thrombectomy group, subjects will receive EVT directly without prior IV rt-PA. Subjects in both groups will undergo rapid EVT. EVT consisted of mechanical thrombectomy, thromboaspiration, balloon dilation, stenting, intra-arterial thrombolysis, or various combinations of these approaches.                                                                                                                                                                                                                                                                                                                                                                                                                                                                                                                                                                                                                                                                          |
| <b>Consent</b>                | Explicit written, signed informed consent from the subject or legally authorized representative will be obtained prior to any protocol specific procedures.                                                                                                                                                                                                                                                                                                                                                                                                                                                                                                                                                                                                                                                                                                                                                                                                                                                                                                                                                                              |
| <b>Randomization Method</b>   | Subjects will be randomly assigned in a 1:1 fashion to receive EVT alone or rt-PA plus EVT. Randomization occurs immediately after baseline (at the EVT institution) CT/MR brain imaging and CT/MR angiography via a real-time, internet-based randomization method. The randomization was stratified by participating centers.                                                                                                                                                                                                                                                                                                                                                                                                                                                                                                                                                                                                                                                                                                                                                                                                          |
| <b>Duration of Treatment</b>  | This study consists of one 90-day study period for each subject.<br>Subjects will be hospitalized for care after their acute stroke according to the current standard of care. Subjects are required to return to clinic on Day 90 for end-of-study procedures.                                                                                                                                                                                                                                                                                                                                                                                                                                                                                                                                                                                                                                                                                                                                                                                                                                                                          |
| <b>Laboratory Tests</b>       | In order to support the assessment of patient safety baseline, chemistry laboratory tests will be completed. At baseline, blood work will be evaluated which includes: Blood cell counts, triglyceride, cholesterol, low density lipoprotein, high density lipoprotein, homocysteine, glucose, procalcitonin, HbA1C, prothrombin time, activated partial thromboplastin time, thrombin time, fibrinogen, D-dimer, international normalized ratio.<br><br>If the subject is female and is of childbearing potential, a pregnancy test (urine or serum point-of-care pregnancy test) must be completed and a negative test result obtained prior to inclusion in the trial.<br><br>Electrocardiograms will also be collected and reviewed at baseline.                                                                                                                                                                                                                                                                                                                                                                                     |
| <b>Assessment of Efficacy</b> | The primary efficacy outcome is the overall proportion of subjects experiencing a functional independence 90 days post randomization, defined as a score of 0 to 2 on the mRS.<br><br>The secondary efficacy outcomes include: <ol style="list-style-type: none"> <li>1) Proportion of mRS score 0 to 1 at 90 days;</li> <li>2) Shift in the distribution of mRS scores at 90 days in EVT alone versus rt-PA plus EVT (ordinal shift analysis);</li> <li>3) Successful recanalization proportion immediate after EVT. Successful recanalization is defined as a modified Treatment in Cerebral Infarction score of 2b (substantial perfusion), 2c (near-complete perfusion) or 3 (complete reperfusion) in the post-procedure angiography;</li> <li>4) Vessel recanalization rate evaluated by CTA or MRA within 48 hours;</li> <li>5) The change of the National Institutes of Health Stroke Scale (NIHSS) score at 24 hours from baseline;</li> <li>6) The change of the NIHSS score at 5-7 days or discharge if earlier from baseline;</li> <li>7) European Quality Five-Dimension Five-Level (EQ-5D-5L) scale score at 90</li> </ol> |



---

|                             |                                                                                                                                                                                                                                                                                                              |
|-----------------------------|--------------------------------------------------------------------------------------------------------------------------------------------------------------------------------------------------------------------------------------------------------------------------------------------------------------|
|                             | days.                                                                                                                                                                                                                                                                                                        |
| <b>Assessment of Safety</b> | 1) Symptomatic intracerebral hemorrhage (sICH) rate within 48 hours;<br>2) Mortality at 90 days;<br>3) Procedure-related complications such as arterial perforation, iatrogenic arterial dissection, arterial access site hematoma, and retroperitoneal hematoma;<br>4) Incidence of serious adverse events. |

899

900

901 **Schedule of Assessments**

|                                                                        | Baseline                  | Day 1<br>(24 ± 12 h<br>from<br>randomization) | Day 2<br>(48 ± 8 h from<br>randomization) | Day 5 or<br>discharge (±1<br>d) | Day 90 (±14<br>d) |
|------------------------------------------------------------------------|---------------------------|-----------------------------------------------|-------------------------------------------|---------------------------------|-------------------|
| Informed consent                                                       | X                         |                                               |                                           |                                 |                   |
| History and examination                                                | X                         |                                               |                                           |                                 |                   |
| Weight*                                                                | X                         |                                               |                                           |                                 |                   |
| Vital Signs (BP, HR,<br>Temp)                                          | X                         | X                                             | X                                         | X                               |                   |
| Randomization                                                          | X                         |                                               |                                           |                                 |                   |
| NIHSS                                                                  | X                         | X                                             |                                           | X                               |                   |
| mRS                                                                    | X*                        |                                               |                                           |                                 | X                 |
| ASPECTS                                                                | X                         |                                               |                                           |                                 |                   |
| EQ-5D-5L                                                               |                           |                                               |                                           |                                 | X                 |
| CBC, electrolytes, INR,<br>aPTT, serum creatinine<br>and serum glucose | X                         | X                                             |                                           |                                 |                   |
| Pregnancy test‡                                                        | X                         |                                               |                                           |                                 |                   |
| NCCT/MR head                                                           | X                         |                                               | X**                                       |                                 |                   |
| CTA/MRA                                                                | X                         |                                               | X                                         |                                 |                   |
| ECG                                                                    | X                         |                                               |                                           |                                 |                   |
| Endovascular Procedure                                                 | X                         |                                               |                                           |                                 |                   |
| sICH                                                                   |                           |                                               | X                                         |                                 |                   |
| Mortality                                                              |                           |                                               |                                           | X                               | X                 |
| AE assessment                                                          | Collected to Day 30 visit |                                               |                                           |                                 |                   |
| SAE assessment                                                         | Collected to Day 90 visit |                                               |                                           |                                 |                   |
| Prior medications§                                                     | X                         |                                               |                                           |                                 |                   |
| Concomitant<br>medications§                                            | Collected to Day 30 visit |                                               |                                           |                                 |                   |

902 \* The subject's actual weight will be measured in hospital using standard hospital scales (i.e., stand up or in-bed  
903 scales if the subject is not ambulatory). If actual weight cannot be measured for any reason (due to, for  
904 example severe illness or unavailability of in-bed scales at the site), weight will be determined by first asking  
905 the subject, second asking a family member or third by estimation.

906 \* Historical (pre-stroke) score.

907 \*\* MR head may be supplanted by an NCCT head if MR is unavailable.

908 ‡ If the subject is female and is of childbearing potential a pregnancy test (urine or serum point-of-care  
909 pregnancy test) must be completed and the result must be negative; this is the only mandatory laboratory test  
910 prior to randomization

911 § Prior and concomitant medications will be listed per patient, with the listings separated within treatment group.

912

## 913 1. BACKGROUND INFORMATION

914 Intravenous thrombolysis with recombinant tissue plasminogen activator (rt-PA) within 4.5 hours of symptom  
915 onset is the first-line treatment for acute ischemic stroke(AIS)<sup>1,2</sup>. Several randomized controlled trials have  
916 consistently demonstrated that intravenous thrombolysis bridging with endovascular treatment (namely bridging  
917 therapy) is superior to intravenous thrombolysis alone for acute anterior large vessel occlusion(LVO)<sup>3-9</sup>.  
918 Intravenous thrombolysis prior to endovascular treatment can be initiated earlier, help eliminate thrombi in distal  
919 or small arteries which are inaccessible for revascularization devices, facilitate mechanical thrombectomy, and  
920 thereby increasing the rate of reperfusion<sup>10,11</sup>. However, intravenous thrombolysis also has some drawbacks. For  
921 instance, it may increase the risk of intracranial or systemic hemorrhage<sup>12</sup>, especially when anti-thrombotic  
922 therapy is administrated after angioplasty and/or stenting. It may also postpone endovascular treatment and  
923 increase medical expenditures<sup>13</sup>. The therapeutic time window of intravenous thrombolysis is very narrow, which  
924 has largely limited its application. In addition, IVT before EVT is associated with an increased incidence of clot  
925 migration, resulting in an increased rate of clots inaccessibility by mechanical thrombectomy<sup>14</sup>.

926 It remains uncertain whether pretreated with intravenous rt-PA provides any additional benefits to the acute  
927 anterior large vessel occlusive patients experiencing endovascular treatment. A meta-analysis revealed that  
928 patients treated with bridging therapy have higher recanalization rates, fewer device passes, equal probabilities  
929 of symptomatic intracerebral hemorrhage, better clinical neurological outcomes, and lower mortality rates  
930 compared with patients treated with direct endovascular treatment<sup>15</sup>. Whereas, a propensity score matching  
931 analysis based on the Chinese population suggested that direct endovascular treatment can achieve similar  
932 efficacy to that of bridging therapy, and a lower proportion of asymptomatic intracranial hemorrhage<sup>12</sup>. Another  
933 meta-analysis showed that direct endovascular treatment may carries comparable effectiveness and safety as  
934 compared with bridging therapy by pooling studies with lower selection bias<sup>16</sup>. However, the baseline  
935 characteristics for the direct endovascular treatment group and bridging-therapy group of these studies are lack  
936 of equipoise, which may have significant influence on the results. Prospective data on direct endovascular  
937 treatment for acute anterior large vessel occlusion remains scarce. Thus, we propose the hypothesis that EVT  
938 alone initiated within 4.5 h of stroke onset is not inferior to rt-PA plus EVT in acute stroke patients with a  
939 proximal LVO in the anterior circulation.

940

## 941 2. TRIAL OBJECTIVES

942 Direct Endovascular Treatment Versus Standard Bridging Therapy in Large Artery Anterior Circulation Stroke  
943 (DEVT) Trial aims to investigate whether EVT alone is non-inferior to rt-PA plus EVT in acute anterior  
944 circulation large vessel occlusive patients who are eligible for intravenous rt-PA.

945

## 946 3. TRIAL DESIGN

947 DEVT trial is a multicenter, prospective, randomized, open-label controlled clinical trial with blinded endpoint  
948 evaluation. It is an academic trial designed by the principal investigators and a steering committee consisting of  
949 experts in cerebrovascular diseases and interventional neuroradiology. The study patient flow outline was shown  
950 in Figure 1.

951 Figure 1 Study flowchart of DEVT trial.

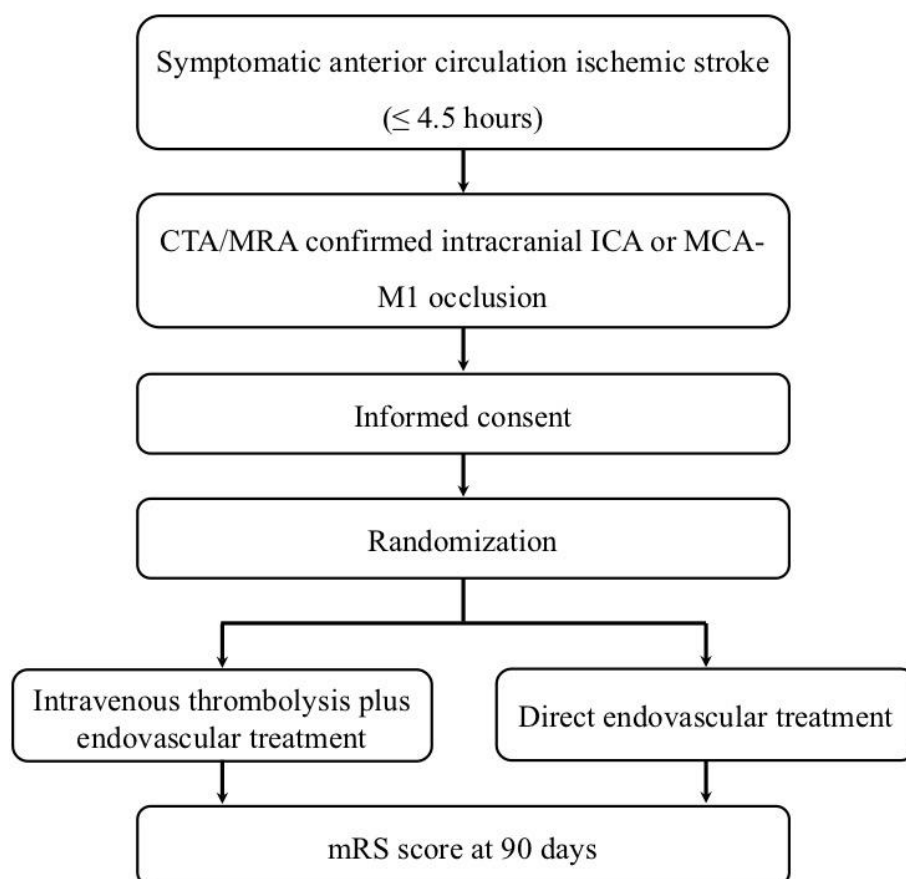

952

953 **4. PATIENT POPULATION**954 **4.1. Inclusion criteria**

- 955 (1) Aged 18 years or older;
- 956 (2) Presenting with AIS symptom within 4.5 hours;
- 957 (3) Eligible for IV rt-PA;
- 958 (4) Occlusion of the intracranial internal carotid artery (ICA) or M1 segment of the middle cerebral artery
- 959 (MCA) confirmed by CT or MR angiography (CTA or MRA);
- 960 (5) Randomization no later than 4 hours 15 minutes after stroke symptom onset;
- 961 (6) Informed consent obtained from patients or their legal representatives.

962 **4.2. Exclusion criteria**

- 963 (1) CT or MR evidence of hemorrhage (the presence of micro-bleeds is allowed);
- 964 (2) Contraindications of IV rt-PA;
- 965 (3) Pre-morbidity with a modified Rankin scale (mRS) score of  $\geq 2$ ;
- 966 (4) Currently in pregnant or lactating or serum beta HCG test is positive on admission;
- 967 (5) Contraindication to radiographic contrast agents, nickel, titanium metals or their alloys;
- 968 (6) Arterial tortuosity and/or other arterial disease that would prevent the device from reaching the target
- 969 vessel;
- 970 (7) Patients with a preexisting neurological or psychiatric disease that would confound the neurological
- 971 functional evaluations;
- 972 (8) Subjects with occlusions in multiple vascular territories (e.g. bilateral anterior circulation, or
- 973 anterior/posterior circulation);
- 974 (9) CT or MRI evidence of mass effect or intracranial tumor (except small meningioma);
- 975 (10) CT or MRI evidence of cerebral vasculitis;

- 976 (11) CTA or MRA evidence of intracranial arteriovenous malformations or aneurysms;  
977 (12) Any terminal illness with life expectancy less than 6 months;  
978 (13) Unlikely to be available for 90-day follow-up;  
979 (14) Current participation in another clinical trial.

980

## 981 **5. PARTICIPATING CENTER ELIGIBILITY**

982 To be fully eligible for participation in this trial, study centers are required have performed at least 80  
983 endovascular procedures annually, including at least 50 thrombectomy procedures with the stent-retriever  
984 devices. Moreover, all neurointerventionists with more than five years' experience in cerebrovascular  
985 intervention and at least 10 cases of mechanical thrombectomy with stent retriever devices annually.

986

## 987 **6. RANDOMIZATION**

988 Subjects will be randomly assigned in a 1:1 fashion to receive EVT alone or IV rt-PA plus EVT. Randomization  
989 occurs immediately after baseline (at the EVT institution) CT/MR brain imaging and CT/MR angiography via a  
990 real-time, internet-based randomization method. The randomization was stratified by participating centers. The  
991 time of randomization is defined as the time randomization occurred on the central server and this time is  
992 considered time zero for the study. IV rt-PA will be infused immediately after randomization.

993 All subjects, investigators, their clinical staff, the clinical coordinating center, the data management group, and  
994 the sponsor staff and delegates will be blinded to the randomization codes. The local laboratories will also be  
995 blinded.

996

## 997 **7. TREATMENTS**

998 Patients are assigned to receive either EVT alone (primary-thrombectomy group) or rt-PA plus EVT  
999 (bridging-therapy group). In the bridging-therapy group, subjects will receive a single rt-PA dose of 0.9 mg/kg  
1000 IV (maximum dose: 90 mg), with 10% given as a bolus, followed by continuous IV infusion of the rest dose  
1001 within 1 hour. Simultaneously, EVT preparation should be initiated with or as soon as IV rt-PA administration.  
1002 While in the primary-thrombectomy group, subjects will receive EVT alone without prior IV rt-PA. Subjects in  
1003 both groups will undergo rapid EVT. EVT consisted of mechanical thrombectomy, thromboaspiration, balloon  
1004 dilation, stenting, intra-arterial thrombolysis, or various combinations of these approaches. The choice of  
1005 technique is left to the discretion of the treating neurointerventionist. Additionally, stenting of the extracranial or  
1006 intracranial artery is permitted when absolutely necessary to obtain access to distal occlusion or to prevent acute  
1007 re-occlusion. This may require the use of thrombolytic agents to prevent acute stent thrombosis. After  
1008 recanalization of the target artery, all patients will get stroke unit care and postoperative management follows the  
1009 current American Heart Association/American Stroke Association guidelines<sup>17</sup>.

1010 The use of conscious sedation or general anesthesia for the procedure to ensure the comfort and safety of patients  
1011 is at the discretion of the individual site neurointerventionalist. The steering committee will make  
1012 recommendations for dosages of thrombolytic agents, procedures, and for devices that will be considered in the  
1013 trial based on proposals by the executive committee or local investigators. The requirements for a device to be  
1014 considered in the trial should be approved by the China Food and Drug Administration or National Medical  
1015 Products Administration.

1016

## 1017 **8. OUTCOMES**

### 1018 **8.1. Primary Efficacy Outcome**

1019 The primary end-point is the overall proportion of subjects experiencing a functional independence 90 days post  
1020 randomization, defined as a score of 0 to 2 on the mRS. To ensure the reliability, evaluability, and traceability of

1021 the mRS score, we keep patients' video or voice version of follow-up at 90 days except those who die or refuse  
1022 to take a video. The primary functional outcome is centrally assessed by two independent certified neurologists  
1023 in a blinded manner by the use of the video or voice recording. Disagreements are resolved by consensus.

## 1024 **8.2. Secondary Efficacy Outcomes**

- 1025 (1) Shift in the distribution of mRS scores at 90 days in EVT alone versus rt-PA plus EVT (ordinal shift  
1026 analysis);
- 1027 (2) Proportion of mRS score 0 to 1 at 90 days;
- 1028 (3) Successful recanalization proportion immediate after EVT. Successful recanalization is defined as an  
1029 expanded Thrombolysis In Cerebral Infarction score of 2b (substantial perfusion), 2c (near-complete  
1030 perfusion) or 3 (complete reperfusion) in the post-procedure angiography<sup>18</sup>;
- 1031 (4) Vessel recanalization rate evaluated by CTA or MRA within 48 hours;
- 1032 (5) The change of the National Institutes of Health Stroke Scale (NIHSS) score at 24 hours from baseline<sup>19</sup>;
- 1033 (6) The change of the NIHSS score at 5-7 days or discharge if earlier from baseline;
- 1034 (7) European Quality Five-Dimension Five-Level (EQ-5D-5L) scale score at 90 days.

## 1035 **8.3 Safety Outcomes**

- 1036 (1) Symptomatic intracerebral hemorrhage (sICH) rate within 48 hours. ICH will be evaluated according to the  
1037 Heidelberg Bleeding Classification<sup>20</sup>. sICH was diagnosed if the new observed ICH was associated with  
1038 any of the following conditions: 1) NIHSS score increased more than 4 points than that immediately before  
1039 worsening; 2) NIHSS score increased more than 2 points in one category; 3) Deterioration led to intubation,  
1040 hemicraniectomy, external ventricular drain placement or any other major interventions. Additionally, the  
1041 symptom deteriorations could not be explained by causes other than the observed ICH. Hemicraniectomy  
1042 will be defined as that surgical procedure used to decompress the swollen hemisphere;
- 1043 (2) Mortality at 90 days. Mortality rates are defined as the number of deaths observed divided by the number of  
1044 subject observed over the 90-day study period;
- 1045 (3) Procedure-related complications such as arterial perforation, iatrogenic arterial dissection, embolization in  
1046 previously uninvolved vascular territory, arterial access site hematoma, and retroperitoneal hematoma.  
1047 Arterial perforation will be defined at angiography by the operator and associated with subarachnoid  
1048 hemorrhage. Iatrogenic arterial dissection will be defined at angiography by the operator. Arterial access  
1049 site hematoma will be assessed as a complication of arterial access puncture and defined by clinical  
1050 examination and anatomic imaging. Retroperitoneal hematoma will be assessed as a complication of groin  
1051 puncture and defined by imaging (ultrasound or CTA or MR). The definition of embolization in previously  
1052 uninvolved vascular territory is noted after recanalization of the primary occlusion site, any vessel  
1053 occlusions distal from the primary occlusion site are considered emboli due to periprocedural thrombus  
1054 fragmentation.
- 1055 (4) Incidence of serious adverse events.

1056

## 1057 **9. BLINDING AND MASKING**

1058 Each site will designate one or more physician(s) to perform the follow-up evaluation at 24 hours, 5-7 days or  
1059 discharge if earlier and at 90 days who cannot be involved in care of the subjects and must remain blinded to  
1060 treatment assignment of each subject.

1061 Regarding the NIHSS examination at baseline, 24 hours, 5-7 days or discharge if earlier and the primary  
1062 end-point, first, a local independent neurologist, not involved in the trial patient management, will evaluate the  
1063 scores in a face to face clinical visit, recording the examination by video with the consent of patient or the legal  
1064 representative; and second, two experienced and certified physicians will centrally evaluate the score by using

1065 the video recording. For cases with disagreement between the two assessors, decisions are made by the third  
1066 experienced neurologist.

1067 All neuroimaging end-points including baseline Alberta Stroke Program Early Computed Tomography Score  
1068 (ASPECTS) score, recanalization within 48 hours, collateral circulation classification and hemorrhage will be  
1069 determined by the CT/MR core laboratory, which will be also blinded to treatment allocation. Another  
1070 independent angiographic core lab will review angiographic images from the procedure to determine clot  
1071 location and recanalization. Serious adverse events (SAEs) and procedure-related complications will be reviewed  
1072 and adjudicated by two individuals of the independent clinical events committee who will be blinded to  
1073 treatment allocation.

1074

## 1075 **10. ASSESSMENT OF EFFICACY**

### 1076 **10.1. The Modified Rankin Scale**

1077 The mRS is a valid and reliable clinician-reported measure of global disability that has been widely applied for  
1078 evaluating recovery from stroke. It is a scale used to measure functional recovery (the degree of disability or  
1079 dependence in daily activities) of people who have suffered a stroke<sup>21,22</sup>. mRS scores range from 0 to 6, with 0  
1080 indicating no residual symptoms; 5 indicating bedbound, requiring constant care; and 6 indicating death. The  
1081 mRS will be obtained at Day 90. Premorbid mRS status will also be obtained retrospectively and reported on the  
1082 24h CRF page. The mRS will only be scored by those trained and certified in the use of this scale.

### 1083 **10.2. The National Institutes of Health Stroke Scale**

1084 The NIHSS is a standardized neurological examination score that is a valid and reliable measure of disability and  
1085 recovery after acute stroke<sup>19</sup>. Scores range from 0 to 42, with higher scores indicating increasing severity. The  
1086 scale includes measures of level of consciousness, extra ocular movements, motor and sensory tests,  
1087 coordination, language and speech evaluations. The NIHSS will be administered at Baseline, at 24 hours from  
1088 baseline, Day 5-7or discharge. The NIHSS will only be scored by those trained and certified in the use of this  
1089 scale.

### 1090 **10.3. EQ-5D-5L**

1091 The EQ-5D-5L is a generic instrument for describing and valuing health. It is based on a descriptive system that  
1092 defines health in terms of five dimensions: Mobility, Self-Care, Usual Activities, Pain/Discomfort, and  
1093 Anxiety/Depression<sup>23</sup>. Each dimension has five response categories corresponding to: no problems, slight,  
1094 moderate, severe and extreme problems. The instrument is designed for self-completion, and respondents also  
1095 rate their overall health on the day of the interview on a 0-100 hash-marked, vertical visual analogue scale. The  
1096 EQ-5D-5L will be administered on Day 90 by those trained in the use of this scale.

1097

## 1098 **11. ASSESSMENT OF SAFETY**

### 1099 **11.1. Adverse Event Definitions**

#### 1100 **11.1.1. Adverse Event**

1101 An adverse event (AE) is any untoward medical occurrence in a patient or clinical investigation subject  
1102 administered a pharmaceutical product and which does not necessarily have to have a causal relationship with  
1103 this treatment. An AE can therefore be any unfavorable and unintended sign (including an abnormal laboratory  
1104 finding, for example), symptom or disease temporally associated with the use of a medicinal product, whether or  
1105 not considered related to the medicinal product.

1106 Therefore, an AE may be: A new illness; The worsening of a concomitant illness; An effect of vaccination,  
1107 including the comparator; A combination of the above.

1108 Pre-existing medical conditions are not to be reported as AEs. However, if a pre-existing condition worsens in  
1109 frequency or intensity, or if in the assessment of the treating physician there is a change in its clinical

1110 significance, this change should be reported as an AE (exacerbation). This applies equally to recurring episodes  
1111 of pre-existing conditions (e.g., asthma) if the frequency or intensity increases post-randomization.

### 1112 11.1.2. Serious Adverse Event

1113 A serious adverse event (SAE) is any untoward medical occurrence that at any dose: Result in death; Are  
1114 life-threatening; Require or prolong inpatient hospitalization; Result in persistent or significant  
1115 disability/incapacity, or; Are a congenital/birth defect.

1116 A SAE can also be an important medical event that may not result in death, be life-threatening, or require  
1117 hospitalization, but may jeopardize the subject and may require medical or surgical intervention to prevent one  
1118 of the outcomes listed in this definition. For example, any new diagnosis of cancer (made after study enrollment)  
1119 is considered an important medical event. Because our primary safety outcomes for the trial are also SAEs by  
1120 definition, they will be reported dually as SAEs and as outcomes. SAEs should be managed according to the best  
1121 current standard of care.

1122 All deaths occurring during the follow up to Day 90 will be reported as an SAE. When reporting a death, the  
1123 event or condition that caused or contributed to the fatal outcome should be reported as a single medical concept.  
1124 AE occurring within 30 days of randomization and all SAEs will be reported in the CRF. Severity and  
1125 relationship definitions are presented below.

### 1126 11.2. Definitions of AE-Related Terms

| AE Severity     |                                                                                                                                                                                                                                                                 |
|-----------------|-----------------------------------------------------------------------------------------------------------------------------------------------------------------------------------------------------------------------------------------------------------------|
| Mild            | Awareness of sign or symptom but easily tolerated                                                                                                                                                                                                               |
| Moderate        | Discomfort sufficient to cause interference with normal activities.                                                                                                                                                                                             |
| Severe          | Incapacitating, with inability to perform normal activities.                                                                                                                                                                                                    |
| AE Relationship |                                                                                                                                                                                                                                                                 |
| Related         | A clinical event, including laboratory test abnormality, where there is a “reasonable possibility” that the SAE was caused by the study drug, meaning that there is evidence or arguments to suggest a causal relationship.                                     |
| Probably        | A clinical event, including laboratory test abnormality, with a reasonable time sequence to drug administration, unlikely to be attributed to concurrent disease or other drugs or chemicals, and which follows a clinically reasonable response on withdrawal. |
| Possibly        | A clinical event, including laboratory test abnormality, with a reasonable time sequence to drug administration, but which could also be explained by concurrent disease or other drugs or chemicals. Information on drug withdrawal may be lacking or unclear. |
| Unrelated       | This category is applicable to AEs which are judged to be clearly and incontrovertibly due to extraneous causes (diseases, environment, etc.) and do not meet the criteria for drug relationship listed for the above-mentioned conditions.                     |

1127

## 1128 12. CLINICAL MANAGEMENT OF ADVERSE EVENTS

### 1129 12.1. Identification of Adverse Events by the Investigator

1130 AE monitoring and reporting will be followed-up until Day 30. SAEs will be followed through the final study  
1131 exit visit (Day 90 Visit or death or end of study whichever is sooner) or until the subject is deemed “lost to  
1132 follow-up”.

1133 AE identification while the subject is admitted to the acute stroke hospital will be collected via acute stroke  
1134 hospital patient records and verbal histories from the subject or legally authorized representative (LAR). For



1135 follow up visits after discharge from the acute stroke hospital the subject (or LAR if the subject is not able to  
1136 respond to the questions) will be asked about the occurrence of AEs since the last contact, and if available, from  
1137 records at the acute stroke hospital. AEs that were ongoing at the last contact will be updated with a stop date or  
1138 confirmed as ongoing. AE collection will continue until Day 30, and SAE to Day 90 or the final contact.

1139 A consistent methodology of eliciting AEs at all subject evaluation timepoints will be used. Non-directive  
1140 questions include: How have you felt since your last clinical visit/hospital discharge? Have you had any new or  
1141 changed health problems since you were last here? Have you had any unusual or unexpected worsening of your  
1142 underlying medical condition or overall health? Have there been any changes in the medicines you take since  
1143 your last clinical visit/hospital discharge?

1144 Diagnosis versus signs and symptoms for the purpose of AE reporting: if known at the time of reporting, a  
1145 diagnosis should be reported rather than individual signs and symptoms. However, if a constellation of signs  
1146 and/or symptoms cannot be medically characterized as a single diagnosis it is acceptable to report the  
1147 information that is ultimately available.

#### 1148 **12.2. Reporting of Adverse Events**

1149 AEs should be reported as they occur on the electronic Case Report Form (e-CRF). Documentation must be  
1150 supported by an entry in the subject's file. Each event should be described in detail along with start and stop  
1151 dates, severity, relationship to investigational product as judged by the investigator, action taken and outcome.

#### 1152 **12.3. Reporting of Serious Adverse Events**

1153 In order to comply with current regulations on SAE reporting to health authorities, the investigator must  
1154 document all SAEs regardless of causal relationship and notify the Sponsor. The Investigator will give access  
1155 and provide the Sponsor with all necessary information to allow the Sponsor to conduct a detailed analysis of the  
1156 safety of the investigational product. It is the responsibility of the Investigator to request all necessary  
1157 documentation (e.g., medical records, discharge summary, autopsy) in order to provide comprehensive safety  
1158 information. All relevant information must then be transcribed into the e-SAE Form.

#### 1159 **12.4. Reporting by the Investigator**

1160 All SAEs must be reported to the Sponsor within 24 hours of the local Investigator's first awareness of its  
1161 occurrence. SAEs will be reviewed by the trial medical monitor.

1162 The investigator will report the SAEs using the e-SAE form in the e-CRF, which will send an immediate alert to  
1163 the Sponsor. If the e-CRF system is not available, a paper SAE form should be directed within 24 hours.

#### 1164 **12.5. Reporting SAEs to the Health Authorities and Ethics Committees**

1165 The Sponsor will inform the relevant health authorities of any reportable SAEs according to the local regulatory  
1166 requirements. Reporting to the health authorities will be according to the Sponsor's standard operating  
1167 procedures.

1168 SAEs that are assessed by the Sponsor to be unexpected and related to study drug (expedited reporting SAEs)  
1169 will be reported to the regulatory agencies as per country requirements. All other SAEs will be reported to  
1170 regulatory agencies based upon local reporting requirements.

1171 The Sponsor's medical monitor or designee will notify the investigators in writing of the occurrence of any  
1172 reportable SAEs. The Sponsor or delegate will be responsible for reporting suspected unexpected serious adverse  
1173 reaction to any Central Ethics Committees in compliance with local current legislation. The investigators will be  
1174 responsible for informing their local ethics committees of any reportable SAEs as per their local requirements.

1175

#### 1176 **13. DATA SAFETY MONITORING BOARD**

1177 The independent Data safety monitoring board (DSMB) will be composed of an experienced neurologist, an  
1178 interventionalist, and a biostatistician, which are not involved in the trial. The DSMB will meet at least once a  
1179 year, and is provided with structured unmasked reports, prepared by the trial statistician, for their reference only.

1180 DSMB is responsible for recommendations to the executive committee regarding stopping or extending the trial.  
1181 In addition, the DSMB will review the occurrence of SAEs and make recommendations to the executive  
1182 committee regarding safety of the trial.  
1183

#### 1184 **14. IMAGING CORE LABORATORY**

1185 Centralized imaging core laboratories will be used in this trial to provide consistent assessment of all the images.  
1186 CT/MR and angiographic images will be independently reviewed by two independent central imaging core  
1187 laboratories respectively. CT/MR core laboratory will review CT/MR images obtained at baseline and within 24  
1188 hours for confirmation of inclusion criteria, ASPECTS score, collateral circulation classification, and  
1189 presence/absence of hemorrhage. Angiographic core laboratory will review angiographic images from the  
1190 procedure to determine clot location and recanalization. CT/MR core laboratory will be independent from the  
1191 angiographic core laboratory to ensure the CT/MR core laboratory is blinded to the treatment allocation.  
1192

#### 1193 **15. CLINICAL EVENTS COMMITTEE**

1194 The Clinical events committee (CEC) will be comprised of three expert physicians independent of the  
1195 investigational sites. This committee will validate all the complications that occur over the course of the study  
1196 and categorized for severity and relatedness according to the definition in the Adverse Event section in the CEC  
1197 Manual of Operations. The CEC can request any additional source information and images supporting the  
1198 adverse events to assist with the adjudication.  
1199

#### 1200 **16. STATISTICS**

##### 1201 **16.1. Sample size estimates**

1202 According to the previous study data<sup>12,24-26</sup>, we hypothesis that the 90-day follow-up proportion of independent  
1203 functional outcome is 43% both in the primary-thrombectomy group and bridging-therapy group. The clinically  
1204 relevant non-inferiority margin  $\Delta$  was -10.0%. To maintain the alpha, Pocock Analog Alpha Spending Function  
1205 is used. Sample size and power are computed incorporating a five-look group-sequential analysis plan with a  
1206 one-sided  $\alpha$  at 0.025, 918 cases provide 80% power for testing the primary hypothesis of this trial; assuming the  
1207 attrition rate is 5% for the primary end-point, the total sample size is up to 970. The evaluable sample size is 194  
1208 at each interim analysis. Therefore, in each interim analysis, 97 cases should be enrolled in each treatment group.

##### 1209 **16.2. Analysis Populations**

###### 1210 **16.2.1. Intention-to-treat Population**

1211 The primary efficacy analysis will be conducted in the intention-to-treat (ITT) population, defined as all subjects  
1212 randomized into the trial with grouping by randomized treatment, regardless of treatment actually received.  
1213 Deceased subject will be included in the ITT population with a mRS score of 6.

###### 1214 **16.2.2. Per-Protocol Population**

1215 The primary analysis will be repeated on the Per-Protocol (PP) population, defined to be all subjects randomized  
1216 and treated, with no major protocol deviations. This population will be determined via blinded review of  
1217 protocol deviations at the end of the trial before database lock and unblinding. Prior to unblinding, the imaging  
1218 from each subject at the time of inclusion will be adjudicated to determine whether they have met the criteria for  
1219 endovascular intervention, and hence for the trial. This will include review of baseline NCCT and CTA. Subjects  
1220 who do not meet the imaging criteria outlined in the trial inclusion/exclusion criteria, will not be included in the  
1221 PP population.

1222 Patients who withdraw informed consent immediately after randomization and are not to receive any treatment  
1223 should be excluded from all analysis populations.

##### 1224 **16.3. Analysis of Primary Efficacy Outcome**

1225 Non-inferiority test will be used to test the primary hypothesis that the proportion of patients with independent  
1226 functional outcome will be non-inferior in the primary-thrombectomy group compared to the bridging-therapy  
1227 group. We desired a maximum of 5 looks when approximately 20, 40, 60, 80, and 100% of the total sample size  
1228 finish the follow-up, monitoring and data cleaning processes. A group-sequential test strategy was designed to  
1229 have reasonable chances of stopping as early as possible, either because of efficacy or safety reasons. The  
1230 independent DSMB may recommend stopping the trial either for effectiveness, or safety in case the stopping  
1231 boundaries are crossed at interim analysis. For shedding cases, follow-up will be performed until the end of the  
1232 study, and the results will be included in the final analysis. Statistical analysis will be performed on the SAS 9.3  
1233 system. Details of these are provided in the Statistical Analysis Plan.

#### 1234 **16.4. Analysis of secondary efficacy outcomes**

1235 The key secondary outcomes will be tested in the following order:

- 1236 1.The Proportion of mRS score 0 to 1 at 90 days;
- 1237 2.Shift in the distribution of mRS scores at 90 days in EVT alone versus rt-PA plus EVT (ordinal shift analysis);
- 1238 3.Successful recanalization proportion immediate after EVT.
- 1239 4.Vessel recanalization rate evaluated by CTA or MRA within 48 hours;
- 1240 5.The change of the National Institutes of Health Stroke Scale (NIHSS) score at 24 hours from baseline;
- 1241 6.The change of the NIHSS score at 5-7 days or discharge if earlier from baseline;
- 1242 7.European Quality Five-Dimension Five-Level (EQ-5D-5L) scale score at 90 days.

#### 1243 **16.5. Adjustment for covariates and subgroup analyses**

1244 In addition to the primary and secondary analyses adjusting for age, sex, baseline NIHSS score, baseline  
1245 ASPECTS score, occlusion location, exploratory analyses will be conducted to determine the potential roles of  
1246 common baseline characteristics and assess potential heterogeneity of treatment effect across subgroups. Specific  
1247 subgroups of interest include the age  $\geq 70$  vs.  $< 70$  years old, male vs. female, subject with different baseline  
1248 stroke severity (on NIHSS and measured radiologically on ASPECTS), baseline occlusion location (ICA  
1249 occlusion: no vs. yes), cause of stroke, onset to randomization time. Full details will be specified in detail in the  
1250 Statistical Analysis Plan.

#### 1251 **16.6. Handling of Missing Data**

1252 Every effort will be made to keep missing data, particularly the Day 90 outcome assessments, to a minimum.  
1253 However, some missing data may be inevitable due to, for example, loss to follow-up. Deceased subject will  
1254 score 6 on the mRS and be counted as non-responders. For the primary analysis for regulatory submission, we  
1255 will assume that subject missing the primary endpoint data will be considered to be non-responders. Sensitivity  
1256 analyses using various imputation techniques will be specified prospectively in the Statistical Analysis Plan  
1257 before the database lock for the interim analysis if more than 5% of subject randomized are missing the primary  
1258 endpoint.

#### 1259 **16.7. Analyses of Safety**

1260 The main analyses will be frequency of sICH and 90-day mortality. It is expected that the safety population and  
1261 the ITT population will be near-identical. Full details will be specified in detail in the Statistical Analysis Plan.

#### 1262 **16.8. SAEs**

1263 SAEs over the 90-day study period will be summarized by presenting, for each treatment group, the number and  
1264 percentage of subjects having at least one SAE, having an SAE in each body system and preferred term, by  
1265 severity and relatedness to study medication. The frequencies and incidences of SAEs occurring in subjects in  
1266 the active and control groups will be summarized within treatment group by the Medical Dictionary for  
1267 Regulatory Activities (MedDRA) System Organ Class (SOC). The frequencies and incidences of SAEs and  
1268 discontinuations due to SAEs occurring in subjects in the active and control groups will be summarized within  
1269 treatment group.

**1270 16.9. AEs**

1271 Additional analyses will consider the frequency of AEs and discontinuations due to AEs. AEs will be  
1272 summarized by presenting, for each treatment group, the number and percentage of subjects having any AE,  
1273 having an AE in each body system and preferred term. Severity and relatedness to study medication will be  
1274 recorded. The frequencies and incidences of AEs occurring in subjects in the active and control groups will be  
1275 summarized within treatment group by the Medical Dictionary for Regulatory Activities (MedDRA) System  
1276 Organ Class (SOC).

1277

**1278 17. DIRECT ACCESS TO SOURCE DATA/DOCUMENTS**

1279 The sponsor or delegate will be permitted to visit the study facilities at any reasonable time in order to maintain  
1280 current, detailed knowledge of the study through review of the records, source documents, observation, and  
1281 discussion of the conduct and progress of the study. In addition, the sponsor will maintain regular telephone and  
1282 written communication with all investigators through the coordinating center. The sponsor (or delegate) will be  
1283 given complete access to all components of the study facility that pertain to the conduct of this study, and may be  
1284 present to observe any aspect of the conduct of the study by medical and paramedical staff, including but not  
1285 limited to drug preparations, dosing, sample collections, and clinical observations. E-CRFs will be monitored  
1286 with sufficient frequency to assess the following: Subject randomization, compliance with protocol procedures,  
1287 the completeness and accuracy of data entered into the e-CRFs, verification of e-CRF data against original  
1288 source documents, and occurrence of AEs. Adequate time and all documents for these monitoring visits must be  
1289 made available by the investigators. The investigators will permit trial-related monitoring, audits, REB/IRB  
1290 review, and regulatory inspections, providing direct access to source data/documents.

1291

**1292 18. QUALITY CONTROL AND QUALITY ASSURANCE**

1293 To ensure monitoring responsibilities are performed to the fullest extent possible, industry experienced study  
1294 monitors will perform on site data verification for the trial. All data monitored on site are verified for accuracy  
1295 and completeness using source documents for all subjects. In addition, 100% of subjects enrolled are monitored  
1296 for the presence of signed consent.

1297 Monitoring of the investigational sites will be conducted by the sponsor or contracted to a qualified clinical  
1298 research organization. The sponsor will determine the extent, nature, and frequency of on-site visits that are  
1299 needed to ensure that the study is being conducted in accordance with the approved protocol (and any  
1300 amendments), Good Clinical Practice (GCP), and all applicable regulatory requirements. At site visits, the  
1301 monitor will, as required, assess the progress of the study; check that the study data chosen for verification are  
1302 authentic, accurate, and complete; verify that the safety and rights of patients are being protected; compare  
1303 original documents with data entered into the study database; and identify any issues and address their  
1304 resolution.

1305 The investigator agrees to allow the monitor(s) direct access to all relevant documents, and to allocate his/her  
1306 time and the time of staff to discuss findings, corrective actions and any relevant issues. In addition to contacts  
1307 during the study, the monitor may also contact the site prior to the start of the study to discuss the protocol and  
1308 data collection procedures with site personnel.

1309 Additional on-site monitoring verification includes: ongoing evaluation of the adequacy of site facilities and staff,  
1310 site recruitment, subject randomization, the presence of regulatory documents, and specific review of documents  
1311 and data. The initial performance-monitoring visit to a site takes place after the initial subject(s) are enrolled and  
1312 will continue according to enrolment for the duration of the trial.

1313 During the monitoring visit, any omissions and corrections to data submitted to the database will be noted and  
1314 queries will be generated by the monitor and resolved by the site.

1315 The close-out monitoring visit by the monitor will take place at the completion of subject enrollment and  
1316 protocol required follow-up visits at the performance site. At that visit, the monitor will again review the  
1317 presence of a regulatory file and verify documents for currency and completion as directed by the clinical  
1318 research unit. Sites will be instructed in the record retention of all trial documents. Principal Investigators are  
1319 directed to close the trial and issue a final report to the institutional review board. Finally, any additional special  
1320 considerations for the auditing of any additional safety issues are made during this final monitoring visit.

1321 Except for an emergency situation in which proper care for the protection, safety and well- being of the study  
1322 subjects requires medical treatment, the study will be conducted as described in the approved protocol,  
1323 International Conference on Harmonization-Good Clinical Practice (ICH-GCP), Standard Operating Procedures  
1324 (SOPs) and regulatory requirements. All medical treatments will be recorded. Any deviation(s) from the protocol  
1325 will be recorded and presented in the final clinical study report.

#### 1326 **18.1. Audits and Inspections**

1327 In accordance with the principles of ICH-GCP, the study site may be inspected by regulatory authorities. Quality  
1328 Assurance (QA) or their designates. The investigator and relevant clinical support staff will be required to be  
1329 actively involved in audits and inspections, including staff interviews, and to make all necessary documentation  
1330 and data available upon request.

1331 During the course of the study and/or after it has been completed, one or more investigator site audits may be  
1332 undertaken by auditors. The purpose of these audits is to determine whether or not the study is being/has been  
1333 conducted and monitored in compliance with recognized ICH-GCP, protocol and approved amendment  
1334 requirements, applicable local SOPs, and local laws and regulations. It is the responsibility of the investigator  
1335 and site staff to promptly address any deficiencies stemming out of regulatory inspections and delegate audits,  
1336 and to ensure that agreed-upon corrective and preventive actions are implemented as soon as possible.

1337 An inspection by any regulatory authority may occur at any time during or after completion of the study.

#### 1338 **18.2. Protocol Amendments and Revisions**

1339 Should amendments and/or revisions to the protocol be required, they will be originated and documented by the  
1340 sponsor. All amendments and/or revisions will be made in compliance with sponsor SOPs. All amendments will  
1341 be submitted to the research ethics board/Institutional Review Board (REB/IRB) for approval prior to  
1342 implementation. It is the sponsor's responsibility to submit all revisions and amendments to regulatory  
1343 authorities when necessary.

1344

### 1345 **19. ETHICAL CONSIDERATION**

1346 This research followed the ethical principles of the Helsinki Declaration. This protocol and the consent forms  
1347 will be submitted to each hospital's REB/IRB. Before initiation of the study, a copy of the REB/IRBs' approval  
1348 letters will be provided to the sponsor and the membership list of the REB/IRB will be kept on file. To make  
1349 sure the subjects fully understand about this trial, the investigators must provide the patients or their legal  
1350 representatives with detailed information about the clinical trial, including the purpose of the trial, possible  
1351 benefits and risks, and the rights/obligations. Subjects have the right to withdraw from the study at any time if  
1352 they wish to do so. The privacy protection of subjects has to be ensured. The patients or their legal  
1353 representatives give their written informed consent prior to the study. Each patient must leave contact  
1354 information to the investigator of the participating center. At the same time, the investigator must leave his own  
1355 phone number to the patient so that the patient can find the investigator at any time. Ethical approval for the  
1356 study was obtained by the Ethics Committee of the participating centers. SAEs will be reported to the REB/IRB  
1357 according to their requirements.

1358

### 1359 **20. DATA HANDLING AND RECORD KEEPING**

**1360 20.1. Data Handling**

1361 During the trial, clinical data reported in the e-CRFs will be integrated into the clinical database under the  
1362 responsibility of the Sponsor or their qualified representative. Quality control in the form of computerized logic  
1363 and/or consistency checks will be systematically applied in order to detect errors or omissions. In addition, safety  
1364 reviews may be performed several times by the Sponsor's staff in the course of the trial. Any questions  
1365 pertaining to the reported clinical data will be submitted to the investigator for resolution. Each step of this  
1366 process will be monitored through the implementation of individual passwords to maintain appropriate database  
1367 access and to ensure database integrity.

1368 After integration of all corrections in the complete set of data, the database will be released for statistical  
1369 analysis.

**1370 20.2. Investigator Files/Retention of Documents**

1371 The investigator must maintain adequate and accurate records to enable the conduct of the study to be fully  
1372 documented and the study data to be subsequently verified. These documents should be classified into two  
1373 different separate categories: Investigator's Study File; and Subject Clinical Source Documents.

1374 The Investigator's Study File will contain the Protocol/Amendments, CRFs, REB/IRB and governmental  
1375 approval with correspondence, all versions of ethics approved informed consent forms, staff curriculum vitae  
1376 and authorization forms and other appropriate documents/correspondence, etc.

1377 Subject clinical source documents (usually defined by the project in advance to record efficacy/safety parameters  
1378 independent of the CRFs) would include subject hospital/clinic records, physician's and nurse's notes,  
1379 appointment book, original laboratory reports, ECG, image data, signed consent forms, consultant letters, and  
1380 source worksheets. The investigator must keep these two categories of documents on file according to local  
1381 clinical trial regulation.

1382 The Investigator and the sponsor will maintain the records of disposition of the drug and the clinic records in  
1383 accordance with ICH-GCP and each applicable regulatory agency. Clinic records will be retained at the site until  
1384 informed by the sponsor to destroy the documents. If the clinical study must be terminated for any reason, the  
1385 investigator will return all study materials to the sponsor and provide a written statement as to why the  
1386 termination has taken place and notify the REB/IRB.

**1387 20.3. Source Documents and Background Data**

1388 Any investigators shall supply the sponsor, upon request, with any required background data from the study  
1389 documentation or clinic records. This is particularly important when e-CRFs are illegible or when errors in data  
1390 transcription are suspected. In case of special problems and/or governmental queries or requests for audit  
1391 inspections, it is also necessary to have access to the complete study records, provided that subject  
1392 confidentiality is protected.

**1393 20.4. Case Report Forms**

1394 For each subject randomized, an e-CRF must be completed and signed by the investigator. If a subject withdraws  
1395 from the study, the reason must be noted on the CRF. All forms should be completed within five business days  
1396 of subject visit. All corrections will be tracked in the e-CRF audit trail. The Investigator should ensure the  
1397 accuracy, completeness, legibility, and timeliness of the data reported to the sponsor in the CRFs and in all  
1398 required reports.

**1399 20.5. Confidentiality**

1400 All imaging, evaluation forms, reports, and other records that leave the site are identified only by the site and  
1401 subject number to maintain subject confidentiality. All records are kept in a locked file cabinet. Clinical  
1402 information is not released without written permission of the subject, except as necessary for monitoring by  
1403 REB/IRB, health authorities, the sponsor, or the sponsor's designee.

1404 All study investigators at the clinical sites must ensure that the confidentiality of personal identity and all  
1405 personal medical information of study subjects are maintained at all times. clinical sites must conform to local  
1406 privacy and confidentiality law and custom. On the CRFs and other study documents or image materials  
1407 submitted to the CRU, the subjects are identified only by study identification codes.

1408 Personal medical information may be reviewed for the purpose of verifying data recorded in the CRF by the site  
1409 monitors. Other properly authorized persons, such as the regulatory authorities, may also have access to these  
1410 records. Personal medical information is always treated as confidential.

1411

## 1412 **21. PUBLICATION AND PRESENTATION POLICY**

1413 A trial executive committee shall be formed, and include at least the trial principal investigator and co-principal  
1414 investigator, the statistical consultant, and representatives of the Sponsor. The trial executive committee will be  
1415 co-authors on all publications and presentations. The primary author list for the primary publication will consist  
1416 of the executive committee and the site principal/qualified investigator at each of the sites. A formal publication  
1417 policy will be presented and developed by the trial executive.

1418

## 1419 **22. DATA-SHARING PLAN**

1420 The sponsor will permit any and all academic publications arising from the trial data provided that no publication  
1421 containing unblinded trial data precedes publication of the overall trial results in a peer-review journal, and are  
1422 (1) approved by the trial executive committee and (2) the publication authors notify the sponsor at least 30 days  
1423 prior to submittal for publication with a copy of such proposed publication for the sponsor's review and  
1424 comment. Employees or consultants of the sponsor will only be named as authors in any such publication if the  
1425 parties agree that it is appropriate under the usual conventions used by academic institutions for naming authors  
1426 in scientific publications. Upon request of the sponsor the publication or disclosure shall be delayed for up to 60  
1427 days in order to allow for the filing of a patent application. The Executive Committee will make the trial results  
1428 available as free-access using PubMed and on Chinese Clinical Trials Registry. ([www.chictr.org.cn](http://www.chictr.org.cn)).

1429

## 1430 **23. STUDY ORGANIZATION AND FUNDING**

1431 DEVT trial is an investigator-initiated study which is organized by the second affiliated hospital of the Third  
1432 Military Medical University and conducted in about 30 comprehensive stroke centers in China. The authors  
1433 disclosed receipt of the following financial support: (1) National Natural Science Foundation of China (Nos.  
1434 81525008, 81901236, 81801157), (2) Chongqing Major Disease Prevention and Control Technology Research  
1435 Project (No. 2019ZX001), (3) Major clinical innovation technology project of the Second Affiliated Hospital of  
1436 the Army Military Medical University (No. 2018JSLC0017), and (4) Clinical Medical Research Talent Training  
1437 Program of Army Medical University (2019XLC2008, 2019XLC3016). The funders had no involvement in the  
1438 study design, data collection, analysis and interpretation, writing or decision to submit the paper.

1439

**1440 Appendix 1 - Classification of Subtype of Acute Ischemic Stroke**

1441 The TOAST classification system includes five categories: 1) large-artery atherosclerosis, 2) cardioembolism, 3)  
1442 small-artery occlusion (lacunae), 4) stroke of other determined etiology, and 5) stroke of undetermined etiology  
1443 (Table 1)<sup>27</sup>. Diagnoses are based on clinical features and on data collected by tests such as brain imaging  
1444 (CT/MRI), cardiac imaging (echocardiography, etc.), duplex imaging of extracranial arteries, arteriography, and  
1445 laboratory assessments for a pro-thrombotic state.

1446 The physician can apply the clinical and imaging findings when first assessing the patient and then consider the  
1447 results of other diagnostic tests later. An important part of the classification is the ability of the physician to  
1448 categorize a specific subtype diagnosis as probable or possible based on the degree of certainty. A "probable"  
1449 diagnosis is made if the clinical findings, neuroimaging data, and results of diagnostic studies are consistent with  
1450 one subtype and other etiologies have been excluded. A "possible" diagnosis is made when the clinical findings  
1451 and neuroimaging data suggest a specific subtype but other studies are not done. Because many patients will  
1452 have a limited number of diagnostic tests, the probable and possible subcategorizations allow the physician to  
1453 make as precise a subgroup diagnosis as can be achieved.

**1454 Large artery atherosclerosis**

1455 These patients will have clinical and brain imaging findings of either significant (>50%) stenosis or occlusion of  
1456 a major brain artery or branch cortical artery, presumably due to atherosclerosis (Table 2). Clinical findings  
1457 include those of cerebral cortical impairment (aphasia, neglect, restricted motor involvement, etc.) or brain stem  
1458 or cerebellar dysfunction. A history of intermittent claudication, transient ischemic attacks (TIAs) in the same  
1459 vascular territory, a carotid bruit, or diminished pulses helps support the clinical diagnosis. Cortical or cerebellar  
1460 lesions and brain stem or subcortical hemispheric infarcts greater than 1.5 cm in diameter on CT or MRI are  
1461 considered to be of potential large-artery atherosclerotic origin. Supportive evidence by duplex imaging or  
1462 arteriography of a stenosis of greater than 50% of an appropriate intracranial or extracranial artery is needed.  
1463 Diagnostic studies should exclude potential sources of cardiogenic embolism. The diagnosis of stroke secondary  
1464 to large artery atherosclerosis cannot be made if duplex or arteriographic studies are normal or show only  
1465 minimal changes.

**1466 Cardioembolism**

1467 This category includes patients with arterial occlusions presumably due to an embolus arising in the heart (Table  
1468 2). Cardiac sources are divided into high-risk and medium-risk groups based on the evidence of their relative  
1469 propensities for embolism (Table 3). At least one cardiac source for an embolus must be identified for a possible  
1470 or probable diagnosis of cardioembolic stroke. Clinical and brain imaging findings are similar to those described  
1471 for large-artery atherosclerosis. Evidence of a previous TIA or stroke in more than one vascular territory or  
1472 systemic embolism supports a clinical diagnosis of cardiogenic stroke. Potential large-artery atherosclerotic  
1473 sources of thrombosis or embolism should be eliminated. A stroke in a patient with a medium-risk cardiac source  
1474 of embolism and no other cause of stroke is classified as a possible cardioembolic stroke.

**1475 Small artery occlusion (lacunae)**

1476 This category includes patients whose strokes are often labeled as lacunar infarcts in other classifications (Table  
1477 2). The patient should have one of the traditional clinical lacunar syndromes and should not have evidence of  
1478 cerebral cortical dysfunction. A history of diabetes mellitus or hypertension supports the clinical diagnosis. The  
1479 patient should also have a normal CT/MRI examination or a relevant brain stem or subcortical hemispheric  
1480 lesion with a diameter of less than 1.5cm demonstrated. Potential cardiac sources for embolism should be absent,  
1481 and evaluation of the large extracranial arteries should not demonstrate a stenosis of greater than 50% in an  
1482 ipsilateral artery.

**1483 Acute stroke of other determined etiology**



1484 This category includes patients with rare causes of stroke, such as nonatherosclerotic vasculopathies,  
 1485 hypercoagulable states, or hematologic disorders. Patients in this group should have clinical and CT or MRI  
 1486 findings of an acute ischemic stroke, regardless of the size or location. Diagnostic studies such as blood tests or  
 1487 arteriography should reveal one of these unusual causes of stroke. Cardiac sources of embolism and large-artery  
 1488 atherosclerosis should be excluded by other studies.

#### 1489 **Stroke of undetermined etiology**

1490 In several instances, the cause of a stroke cannot be determined with any degree of confidence. Some patients  
 1491 will have no likely etiology determined despite an extensive evaluation. In others, no cause is found but the  
 1492 evaluation was cursory. This category also includes patients with two or more potential causes of stroke so that  
 1493 the physician is unable to make a final diagnosis. For example, a patient with a medium-risk cardiac source of  
 1494 embolism who also has another possible cause of stroke identified would be classified as having a stroke of  
 1495 undetermined etiology. Other examples would be a patient who has atrial fibrillation and an ipsilateral stenosis  
 1496 of 50%, or the patient with a traditional lacunar syndrome and an ipsilateral carotid stenosis of 50%.

1497

#### 1498 **Table 1. TOAST Classification of Subtypes of Acute Ischemic Stroke**

|                                                    |
|----------------------------------------------------|
| Large artery atherosclerosis (embolus/thrombosis)* |
| Cardioembolism (high-risk/medium-risk)*            |
| Small-vessel occlusion (lacunae)*                  |
| Stroke of other determined etiology*               |
| Stroke of undetermined etiology                    |
| a. Two or more causes identified                   |
| b. Negative evaluation                             |
| c. Incomplete evaluation                           |

1499 TOAST denotes Trial of Org 10172 in Acute Stroke Treatment.

1500 \*Possible or probable depending on results of ancillary studies.

1501

#### 1502 **Table 2. Features of TOAST Classification of Subtypes of Ischemic Stroke**

| Features                                                          | Subtype                      |                |                                  |  | Other cause |
|-------------------------------------------------------------------|------------------------------|----------------|----------------------------------|--|-------------|
|                                                                   | Large artery atherosclerosis | Cardioembolism | Small artery occlusion (lacunae) |  |             |
| <b>Clinical</b>                                                   |                              |                |                                  |  |             |
| Cortical or cerebellar dysfunction                                | +                            | +              | -                                |  | +/-         |
| Lacunar syndrome                                                  | -                            | -              | +                                |  | +/-         |
| <b>Imaging</b>                                                    |                              |                |                                  |  |             |
| Cortical, cerebellar, brain stem, or subcortical infarct > 1.5 cm | +                            | +              | -                                |  | +/-         |

---

|                                                  |   |   |     |     |
|--------------------------------------------------|---|---|-----|-----|
| Subcortical or<br>brain stem<br>infarct < 1.5 cm | - | - | +/- | +/- |
|--------------------------------------------------|---|---|-----|-----|

**Tests**

|                                                           |   |   |   |   |
|-----------------------------------------------------------|---|---|---|---|
| Stenosis of<br>extracranial<br>internal carotid<br>artery | + | - | - | - |
| Cardiac source<br>of emboli                               | - | + | - | - |
| Other<br>abnormality on<br>tests                          | - | - | - | + |

---

1503

1504

**Table 3. TOAST Classification of High- and Medium-Risk Sources of Cardioembolism****High-risk sources**

Mechanical prosthetic valve  
 Mitral stenosis with atrial fibrillation  
 Atrial fibrillation (other than lone atrial fibrillation)  
 Left atrial/atrial appendage thrombus  
 Sick sinus syndrome  
 Recent myocardial infarction (<4 weeks)  
 Left ventricular thrombus  
 Dilated cardiomyopathy  
 Akinetic left ventricular segment  
 Atrial myxoma  
 Infective endocarditis

**Medium-risk sources**

Mitral valve prolapse  
 Mitral annulus calcification  
 Mitral stenosis without atrial fibrillation  
 Left atrial turbulence (smoke)  
 Atrial septal aneurysm  
 Patent foramen ovale  
 Atrial flutter  
 Lone atrial fibrillation  
 Bioprosthetic cardiac valve  
 Nonbacterial thrombotic endocarditis  
 Congestive heart failure  
 Hypokinetic left ventricular segment  
 Myocardial infarction (> 4 weeks, < 6 months)

---

1505

---

**1506 Appendix 2 - ASITN/SIR Collateral Vessel Grading System**

1507 Collateral vessel status was evaluated by using the American Society of Interventional and Therapeutic  
1508 Neuroradiology/Society of Interventional Radiology (ASITN/SIR) collateral vessel grading system<sup>28</sup>. Collateral  
1509 vessel scores are categorized into ASITN/SIR grades 0 or 1, 2, and 3 or 4. The following scoring system  
1510 provides a guide.

---

| Grade | Description                                                                                                                                   |
|-------|-----------------------------------------------------------------------------------------------------------------------------------------------|
| 0     | No collateral vessels visible to the ischemic site                                                                                            |
| 1     | Slow collateral vessels to the periphery of the ischemic site with persistence of some of the defect                                          |
| 2     | Rapid collateral vessels to periphery of ischemic site with persistence of some of the defect and to only a portion of the ischemic territory |
| 3     | Collateral vessels with slow but complete angiographic blood flow of the ischemic bed by the late venous phase                                |
| 4     | Complete and rapid collateral blood flow to the vascular bed in the entire ischemic territory by retrograde perfusion                         |

---

1511

1512

**1513 Appendix 3 - The Alberta Stroke Program Early Computed Tomography Score (ASPECTS)**

1514 NCCT shall be scored using ASPECTS, a 10-point score derived by examining each of 10 regions on the middle  
1515 cerebral artery territory<sup>29</sup>. Ischemic change present is scored as 0; ischemic change absent is score as 1. Adding  
1516 up the score gives a maximum of 10 (favorable scan) and minimum of 0 (unfavorable scan). The score is highly  
1517 reliable when trichotomized into 0-4 (severe ischemic change, large core), 5-7 (moderate ischemic change) and  
1518 8-10 (minimal ischemic change, small core). ASPECTS may be less reliable early in stroke (i.e. within 90  
1519 minutes of onset); however, at later time windows it should be easy to recognize large areas of irreversible  
1520 damage. Having a good quality scan and optimization of scanner is key to successful interpretation. Further  
1521 information is available at: [ww.aspectsinstroke.com](http://ww.aspectsinstroke.com).

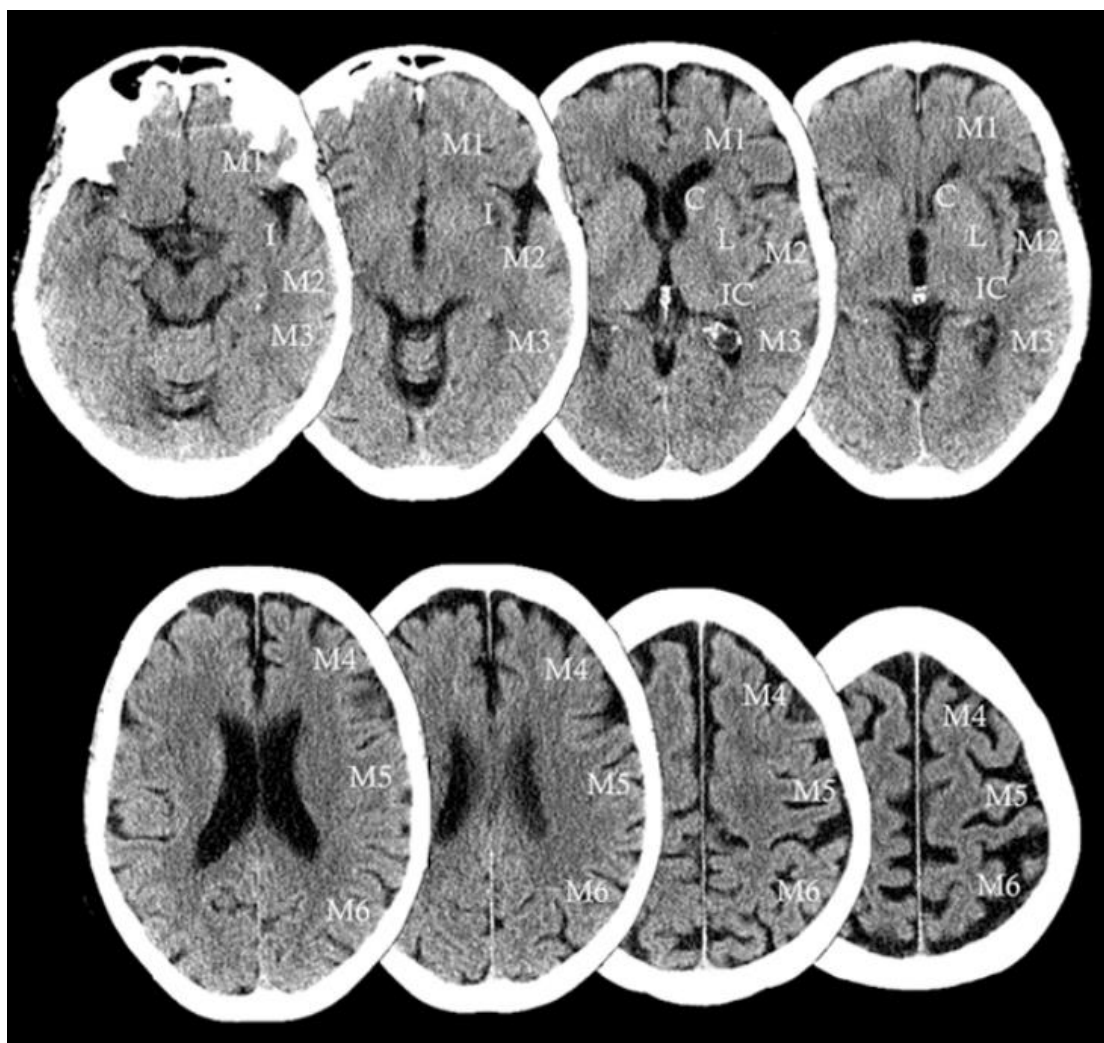

1522

1523

1524 **Appendix 4 - Modified Rankin Scale (MRS)**

| Grade | Description <sup>30</sup>                                                                                                    |
|-------|------------------------------------------------------------------------------------------------------------------------------|
| 0     | No symptoms at all                                                                                                           |
| 1     | No significant disability despite symptoms: able to carry out all usual duties and activities                                |
| 2     | Slight disability: unable to carry out all previous activities but able to look after own affairs without assistance         |
| 3     | Moderate disability: requiring some help, but able to walk without assistance                                                |
| 4     | Moderately severe disability: unable to walk without assistance, and unable to attend to own bodily needs without assistance |
| 5     | Severe disability: bedridden, incontinent, and requiring constant nursing care and attention                                 |
| 6     | Death                                                                                                                        |

1525

1526

---

**1527 Appendix 5 - Expanded Thrombolysis In Cerebral Infarction (eTICI) Scale**

---

| Score | Description <sup>18</sup>                                                                                                                                                                                            |
|-------|----------------------------------------------------------------------------------------------------------------------------------------------------------------------------------------------------------------------|
| 0     | No perfusion or antegrade flow beyond site of occlusion                                                                                                                                                              |
| 1     | Penetration but not perfusion. Contrast penetration exists past the initial obstruction but with minimal filling of the normal territory                                                                             |
| 2     | Incomplete perfusion wherein the contrast passes the occlusion and opacifies the distal arterial bed but rate of entry or clearance from the bed is slower or incomplete when compared with non-involved territories |
| 2a    | Some perfusion with distal branch filling of < 50% of territory visualized                                                                                                                                           |
| 2b    | Substantial perfusion with distal branch filling of $\geq$ 50% of territory visualized                                                                                                                               |
| 2c    | Near-complete perfusion except for slow flow in a few distal cortical vessels or presence of small distal cortical emboli                                                                                            |
| 3     | Complete perfusion with normal filling of all distal branches                                                                                                                                                        |

---

1528

1529

1530

---

**1531 Investigator's Agreement**

1532 I have read the attached protocol: a randomized, controlled, multicenter trial of Direct Endovascular treatment  
1533 Versus standard bridging Therapy for acute stroke patients with large vessel occlusion in the anterior circulation  
1534 (DEVT Trial), Version 2.0 dated 1st August 2019 and agree to abide by all provisions set forth therein. I agree to  
1535 comply with the current International Conference on Harmonization Guidelines for Good Clinical Practice and  
1536 the laws, rules, regulations and guidelines of the community, country, state or locality relating to the conduct of  
1537 the clinical study. I also agree that persons debarred from conducting or working on clinical studies by any court  
1538 or regulatory agency will not be allowed to conduct or work on studies for the sponsor.

1539

1540

1541

1542

1543

1544 Name Site Principal Investigator

Signature

1545

1546

1547 Name of Clinical Site

Date

1548

1549 **REFERENCES**

- 1550 1. Hacke W, Kaste M, Bluhmki E, et al. Thrombolysis with alteplase 3 to 4.5 hours after acute ischemic stroke.  
1551 The New England journal of medicine 2008;359:1317-29.
- 1552 2. National Institute of Neurological D, Stroke rt PASSG. Tissue plasminogen activator for acute ischemic  
1553 stroke. The New England journal of medicine 1995;333:1581-7.
- 1554 3. Muir KW, Ford GA, Messow C-M, et al. Endovascular therapy for acute ischaemic stroke: the Pragmatic  
1555 Ischaemic Stroke Thrombectomy Evaluation (PISTE) randomised, controlled trial. Journal of neurology,  
1556 neurosurgery, and psychiatry 2017;88:38-44.
- 1557 4. Bracard S, Ducrocq X, Mas JL, et al. Mechanical thrombectomy after intravenous alteplase versus alteplase  
1558 alone after stroke (THRACE): a randomised controlled trial. The Lancet Neurology 2016;15:1138-47.
- 1559 5. Saver JL, Goyal M, Bonafe A, et al. Stent-retriever thrombectomy after intravenous t-PA vs. t-PA alone in  
1560 stroke. The New England journal of medicine 2015;372:2285-95.
- 1561 6. Jovin TG, Chamorro A, Cobo E, et al. Thrombectomy within 8 hours after symptom onset in ischemic stroke.  
1562 The New England journal of medicine 2015;372:2296-306.
- 1563 7. Goyal M, Demchuk AM, Menon BK, et al. Randomized assessment of rapid endovascular treatment of  
1564 ischemic stroke. The New England journal of medicine 2015;372:1019-30.
- 1565 8. Campbell BC, Mitchell PJ, Kleinig TJ, et al. Endovascular therapy for ischemic stroke with perfusion-imaging  
1566 selection. The New England journal of medicine 2015;372:1009-18.
- 1567 9. Berkhemer OA, Fransen PS, Beumer D, et al. A randomized trial of intraarterial treatment for acute  
1568 ischemic stroke. The New England journal of medicine 2015;372:11-20.
- 1569 10. Chandra RV, Lesliemazwi TM, Mehta BP, et al. Does the use of IV tPA in the current era of rapid and  
1570 predictable recanalization by mechanical embolectomy represent good value. Journal of neurointerventional  
1571 surgery 2016;8:443-6.
- 1572 11. Grotta JC, Hacke W. Stroke Neurologist's Perspective on the New Endovascular Trials. Stroke; a journal of  
1573 cerebral circulation 2015;46:1447-52.
- 1574 12. Wang H, Zi W, Hao Y, et al. Direct endovascular treatment: an alternative for bridging therapy in anterior  
1575 circulation large-vessel occlusion stroke. European journal of neurology : the official journal of the European  
1576 Federation of Neurological Societies 2017;24:935-43.
- 1577 13. Rai AT, Boo S, Buseman C, et al. Intravenous thrombolysis before endovascular therapy for large vessel  
1578 strokes can lead to significantly higher hospital costs without improving outcomes. Journal of  
1579 neurointerventional surgery 2018;10:17-21.
- 1580 14. Ren Y, Churilov L, Mitchell P, Dowling R, Bush S, Yan B. Clot Migration Is Associated With Intravenous  
1581 Thrombolysis in the Setting of Acute Ischemic Stroke. Stroke; a journal of cerebral circulation 2018;49:3060-2.
- 1582 15. Mistry EA, Mistry AM, Nakawah MO, et al. Mechanical Thrombectomy Outcomes With and Without  
1583 Intravenous Thrombolysis in Stroke Patients: A Meta-Analysis. Stroke; a journal of cerebral circulation  
1584 2017;48:2450-6.
- 1585 16. Kaesmacher J, Mordasini P, Arnold M, et al. Direct mechanical thrombectomy in tPA-ineligible and -eligible  
1586 patients versus the bridging approach: a meta-analysis. Journal of neurointerventional surgery 2019;11:20-7.
- 1587 17. Powers Wj Fau - Rabinstein AA, Rabinstein Aa Fau - Ackerson T, Ackerson T Fau - Adeoye OM, et al. 2018  
1588 Guidelines for the Early Management of Patients With Acute Ischemic Stroke: A Guideline for Healthcare  
1589 Professionals From the American Heart Association/American Stroke Association. stroke 2018;49.
- 1590 18. Liebeskind DS, Bracard S, Guillemin F, et al. eTICI reperfusion: defining success in endovascular stroke  
1591 therapy. Journal of neurointerventional surgery 2019;11:433-8.
- 1592 19. Brott T, Adams HP, Jr., Olinger CP, et al. Measurements of acute cerebral infarction: a clinical examination



- 1593 scale. Stroke; a journal of cerebral circulation 1989;20:864-70.
- 1594 20. von Kummer R, Broderick JP, Campbell BC, et al. The Heidelberg Bleeding Classification: Classification of  
1595 Bleeding Events After Ischemic Stroke and Reperfusion Therapy. Stroke; a journal of cerebral circulation  
1596 2015;46:2981-6.
- 1597 21. Banks JL, Marotta CA. Outcomes validity and reliability of the modified Rankin scale: implications for stroke  
1598 clinical trials: a literature review and synthesis. Stroke; a journal of cerebral circulation 2007;38:1091-6.
- 1599 22. Quinn TJ, Dawson J, Walters MR, Lees KR. Reliability of the modified Rankin Scale: a systematic review.  
1600 Stroke; a journal of cerebral circulation 2009;40:3393-5.
- 1601 23. Herdman M, Gudex C, Lloyd A, et al. Development and preliminary testing of the new five-level version of  
1602 EQ-5D (EQ-5D-5L). Quality of life research : an international journal of quality of life aspects of treatment, care  
1603 and rehabilitation 2011;20:1727-36.
- 1604 24. Broeg-Morvay A, Mordasini P, Bernasconi C, et al. Direct Mechanical Intervention Versus Combined  
1605 Intravenous and Mechanical Intervention in Large Artery Anterior Circulation Stroke: A Matched-Pairs Analysis.  
1606 Stroke; a journal of cerebral circulation 2016;47:1037-44.
- 1607 25. Bellwald S, Weber R, Dobrocky T, et al. Direct Mechanical Intervention Versus Bridging Therapy in Stroke  
1608 Patients Eligible for Intravenous Thrombolysis: A Pooled Analysis of 2 Registries. Stroke; a journal of cerebral  
1609 circulation 2017;48:3282-8.
- 1610 26. Berkhemer OA, Fransen PSS, Beumer D, et al. A randomized trial of intraarterial treatment for acute  
1611 ischemic stroke. The New England journal of medicine 2015;372:11-20.
- 1612 27. Adams HP, Jr., Bendixen BH, Kappelle LJ, et al. Classification of subtype of acute ischemic stroke.  
1613 Definitions for use in a multicenter clinical trial. TOAST. Trial of Org 10172 in Acute Stroke Treatment. Stroke; a  
1614 journal of cerebral circulation 1993;24:35-41.
- 1615 28. Zaidat OO, Yoo AJ, Khatri P, et al. Recommendations on angiographic revascularization grading standards  
1616 for acute ischemic stroke: a consensus statement. Stroke; a journal of cerebral circulation 2013;44:2650-63.
- 1617 29. Pexman JH, Barber PA, Hill MD, et al. Use of the Alberta Stroke Program Early CT Score (ASPECTS) for  
1618 assessing CT scans in patients with acute stroke. AJNR American journal of neuroradiology 2001;22:1534-42.
- 1619 30. Bonita R, Beaglehole R. Recovery of motor function after stroke. Stroke; a journal of cerebral circulation  
1620 1988;19:1497-500.
- 1621
- 1622

## Summary of Changes - Protocol DEVT Version 1.0 to Version 2.0

Below is the table of changes. Deleted items are identified with Strikethrough font. Additional wording is in bold font

| Section(s)                                                                        | Protocol Version 1.0<br>Change From:                                                                                                                                                                                                            | Protocol Version 2.0<br>Change To:                                                                                                                                                                                                                                                                                                                                                                                           | Rationale                                                                         |
|-----------------------------------------------------------------------------------|-------------------------------------------------------------------------------------------------------------------------------------------------------------------------------------------------------------------------------------------------|------------------------------------------------------------------------------------------------------------------------------------------------------------------------------------------------------------------------------------------------------------------------------------------------------------------------------------------------------------------------------------------------------------------------------|-----------------------------------------------------------------------------------|
| List of Abbreviations                                                             |                                                                                                                                                                                                                                                 | MedDRA-Medical Dictionary for Regulatory Activities<br>SOC-System Organ Class                                                                                                                                                                                                                                                                                                                                                | Addition                                                                          |
| Schedule of Assessments                                                           | Weight                                                                                                                                                                                                                                          | Weight*<br>*The subject's actual weight will be measured in hospital using standard hospital scales (i.e., stand up or in-bed scales if the subject is not ambulatory). If actual weight cannot be measured for any reason (due to, for example severe illness or unavailability of in-bed scales at the site), weight will be determined by first asking the subject, second asking a family member or third by estimation. | Clarification                                                                     |
| Schedule of Assessments                                                           | Prior medications<br>Concomitant medications                                                                                                                                                                                                    | Prior medications <sup>§</sup><br>Concomitant medications <sup>§</sup><br>§Prior and concomitant medications will be listed per patient, with the listings separated within treatment group.                                                                                                                                                                                                                                 | Clarification                                                                     |
| Study Synopsis - Assessment of Efficacy & Section 8.2 Secondary Efficacy Outcomes | Successful recanalization proportion immediate after EVT. Successful recanalization is defined as a modified Treatment in Cerebral Infarction score of 2b (50 to 99% reperfusion) or 3 (complete reperfusion) in the post-procedure angiography | Successful recanalization proportion immediate after EVT. Successful recanalization is defined as a <b>expanded Thrombolysis In Cerebral Infarction score</b> of 2b ( <b>substantial perfusion</b> ), 2c ( <b>near-complete perfusion</b> ) or 3 (complete reperfusion) in the post-procedure angiography                                                                                                                    | Updated definition, in response to a comment received from the Research Committee |
| Section 1 BACKGROUND INFORMATION                                                  |                                                                                                                                                                                                                                                 | <b>In addition, IVT before EVT is associated with an increased incidence of clot migration, resulting in an</b>                                                                                                                                                                                                                                                                                                              | Addition                                                                          |

|                                               |                                                                                   |                                                                                                                                                                                                                                                                                                                                                                                                                                                                                                                                                                                                                                                                                           |                                                                             |
|-----------------------------------------------|-----------------------------------------------------------------------------------|-------------------------------------------------------------------------------------------------------------------------------------------------------------------------------------------------------------------------------------------------------------------------------------------------------------------------------------------------------------------------------------------------------------------------------------------------------------------------------------------------------------------------------------------------------------------------------------------------------------------------------------------------------------------------------------------|-----------------------------------------------------------------------------|
|                                               |                                                                                   | <p>increased rate of clots inaccessibility by mechanical thrombectomy. [reference: <i>Stroke</i> 2017;48:2450-6.]</p> <p>Another meta-analysis showed that direct endovascular treatment may carries comparable effectiveness and safety as compared with bridging therapy by pooling studies with lower selection bias. [reference: <i>Journal of neurointerventional surgery</i> 2019;11:20-7.]</p>                                                                                                                                                                                                                                                                                     |                                                                             |
| <b>Section 10.1 The Modified Rankin Scale</b> | Premorbid mRS status will also be obtained retrospectively <del>at 24 Hours</del> | Premorbid mRS status will also be obtained retrospectively <b>and reported on the 24h CRF page.</b>                                                                                                                                                                                                                                                                                                                                                                                                                                                                                                                                                                                       | Clarification of the premorbid mRS collection time and reporting on the CRF |
| <b>Section 16.8 SAEs</b>                      |                                                                                   | <p><b>SAEs over the 90-day study period will be summarized by presenting, for each treatment group, the number and percentage of subjects having at least one SAE, having an SAE in each body system and preferred term, by severity and relatedness to study medication. The frequencies and incidences of SAEs occurring in subjects in the active and control groups will be summarized within treatment group by the Medical Dictionary for Regulatory Activities (MedDRA) System Organ Class (SOC). The frequencies and incidences of SAEs and discontinuations due to SAEs occurring in subjects in the active and control groups will be summarized within treatment group</b></p> | <p>Addition,<br/>To be consistent with the Statistical Analysis Plan</p>    |
| <b>Section 16.9 AEs</b>                       |                                                                                   | <p><b>Additional analyses will consider the frequency of AEs and discontinuations due to AEs. AEs will be summarized by presenting, for each treatment group, the number and percentage of subjects having any AE, having an AE in each body system and preferred term. Severity and</b></p>                                                                                                                                                                                                                                                                                                                                                                                              | <p>Addition,<br/>To be consistent with the Statistical Analysis Plan</p>    |

|                                                                                    |                                                                                                                                                                                                                                                                                                                                                                                                                                                                                                                                                                                                                                                                |                                                                                                                                                                                                                                                                                                                                                                                                                                                                                                                                                                                                                                                                                                                                                                                                                                                                                                             |                                                                                          |
|------------------------------------------------------------------------------------|----------------------------------------------------------------------------------------------------------------------------------------------------------------------------------------------------------------------------------------------------------------------------------------------------------------------------------------------------------------------------------------------------------------------------------------------------------------------------------------------------------------------------------------------------------------------------------------------------------------------------------------------------------------|-------------------------------------------------------------------------------------------------------------------------------------------------------------------------------------------------------------------------------------------------------------------------------------------------------------------------------------------------------------------------------------------------------------------------------------------------------------------------------------------------------------------------------------------------------------------------------------------------------------------------------------------------------------------------------------------------------------------------------------------------------------------------------------------------------------------------------------------------------------------------------------------------------------|------------------------------------------------------------------------------------------|
|                                                                                    |                                                                                                                                                                                                                                                                                                                                                                                                                                                                                                                                                                                                                                                                | <p><b>relatedness to study medication will be recorded. The frequencies and incidences of AEs occurring in subjects in the active and control groups will be summarized within treatment group by the Medical Dictionary for Regulatory Activities (MedDRA) System Organ Class (SOC).</b></p>                                                                                                                                                                                                                                                                                                                                                                                                                                                                                                                                                                                                               |                                                                                          |
| <p><b>Section 23. STUDY ORGANIZATION AND FUNDING</b></p>                           | <p>DEVT trial is an investigator-initiated study which is organized by the second affiliated hospital of the Third Military Medical University and conducted in about 30 comprehensive stroke centers in China. The authors disclosed receipt of the following financial support: (1) National Science Fund for Distinguished Young Scholars (No. 81525008), and (2) Major clinical innovation technology project of the Second Affiliated Hospital of the Army Military Medical University (No. 2018JSLC0017). The funders had no involvement in the study design, data collection, analysis and interpretation, writing or decision to submit the paper.</p> | <p>DEVT trial is an investigator-initiated study which is organized by the second affiliated hospital of the Third Military Medical University and conducted in about 30 comprehensive stroke centers in China. The authors disclosed receipt of the following financial support: (1) National Natural Science Foundation of China (Nos. 81525008, <b>81901236, 81801157</b>), (2) <b>Chongqing Major Disease Prevention and Control Technology Research Project (No. 2019ZX001)</b>, (3) Major clinical innovation technology project of the Second Affiliated Hospital of the Army Military Medical University (No. 2018JSLC0017), and (4) <b>Clinical Medical Research Talent Training Program of Army Medical University (2019XLC2008, 2019XLC3016)</b>. The funders had no involvement in the study design, data collection, analysis and interpretation, writing or decision to submit the paper.</p> | <p>Addition</p>                                                                          |
| <p><b>Appendix 5 - Modified Treatment In Cerebral Infarction (mTICI) Score</b></p> | <p><del>Modified Treatment In Cerebral Infarction (mTICI) Score</del></p>                                                                                                                                                                                                                                                                                                                                                                                                                                                                                                                                                                                      | <p><b>Expanded Thrombolysis in Cerebral Infarction Scale</b></p>                                                                                                                                                                                                                                                                                                                                                                                                                                                                                                                                                                                                                                                                                                                                                                                                                                            | <p>Updated definition, in response to a comment received from the Research Committee</p> |
