# Supplementary material
Source: PubMed Central journal article supplement (PMC7816099)
Supplement: jama-e2023523-s004.pdf [file jama-e2023523-s004.pdf]

## Supplemental Online Content

Zi W, Qui Z, Li F, et al. Effect of endovascular treatment alone versus intravenous alteplase plus endovascular treatment on functional independence in patients with acute ischemic stroke: the DEVT randomized clinical trial. *JAMA*. doi:10.1001/jama.2020.23523

### CONSORT checklist

#### eMethods

**eFigure 1.** Overview of the DEVT trial

**eFigure 2.** Analysis of the primary outcome in the first interim analysis (n=194) used by the DSMB to take the decision to stop the trial

**eFigure 3.** Distribution of participating centers on the map of China

**eFigure 4.** Number of patients recruited by each center

**eFigure 5.** Kaplan-Meier estimates of the probability of death in patients

**eFigure 6.** Analysis of functional independence at 90 days in prespecified subgroups

**eFigure 7.** Distribution of modified Rankin scale scores at 90 days in prespecified subgroups

**eTable 1.** Additional baseline characteristics

**eTable 2.** Additional workflow metrics and procedural characteristics

**eTable 3.** Primary and secondary outcomes in per-protocol analysis

**eTable 4.** Safety outcomes in per-protocol analysis

**eTable 5.** The hierarchical modeling and sensitivity analyses for assessment of site effects (post hoc analysis)

**eTable 6.** Differences between DEVT, DIRECT-MT, and SKIP trial

**eTable 7.** Assessment of intracranial hemorrhage based on Heidelberg classification

**eTable 8.** Definitions of Symptomatic Intracerebral Hemorrhage

#### eReferences

This supplemental material has been provided by the authors to give readers additional information about their work.



## CONSORT checklist

| Section/Topic             | Item No | Checklist item                                                                                                                        | Reported on page No                                                |
|---------------------------|---------|---------------------------------------------------------------------------------------------------------------------------------------|--------------------------------------------------------------------|
| <b>Title and abstract</b> |         |                                                                                                                                       |                                                                    |
|                           | 1a      | Identification as a randomised trial in the title                                                                                     | 1                                                                  |
|                           | 1b      | Structured summary of trial design, methods, results, and conclusions (for specific guidance see CONSORT for abstracts)               | 10-12                                                              |
| <b>Introduction</b>       |         |                                                                                                                                       |                                                                    |
| Background and objectives | 2a      | Scientific background and explanation of rationale                                                                                    | 13-14                                                              |
|                           | 2b      | Specific objectives or hypotheses                                                                                                     | 14                                                                 |
| <b>Methods</b>            |         |                                                                                                                                       |                                                                    |
| Trial design              | 3a      | Description of trial design (such as parallel, factorial) including allocation ratio                                                  | 14, 16                                                             |
|                           | 3b      | Important changes to methods after trial commencement (such as eligibility criteria), with reasons                                    | Summary of Changes of protocol, page 66-68 in Supplement 2         |
| Participants              | 4a      | Eligibility criteria for participants                                                                                                 | 15                                                                 |
|                           | 4b      | Settings and locations where the data were collected                                                                                  | 15                                                                 |
| Interventions             | 5       | The interventions for each group with sufficient details to allow replication, including how and when they were actually administered | 16-17                                                              |
| Outcomes                  | 6a      | Completely defined pre-specified primary and secondary outcome measures, including how and when they were assessed                    | 17-19                                                              |
|                           | 6b      | Any changes to trial outcomes after the trial commenced, with reasons                                                                 | Page 66 in the Summary of Changes of trial protocol (Supplement 2) |
| Sample size               | 7a      | How sample size was determined                                                                                                        | 19-20                                                              |

| Section/Topic                                        | Item No | Checklist item                                                                                                                                                                              | Reported on page No                                      |
|------------------------------------------------------|---------|---------------------------------------------------------------------------------------------------------------------------------------------------------------------------------------------|----------------------------------------------------------|
|                                                      | 7b      | When applicable, explanation of any interim analyses and stopping guidelines                                                                                                                | Page 5-6 in the Statistical Analysis Plan (Supplement 3) |
| Randomisation:                                       |         |                                                                                                                                                                                             |                                                          |
| Sequence generation                                  | 8a      | Method used to generate the random allocation sequence                                                                                                                                      | 16                                                       |
|                                                      | 8b      | Type of randomisation; details of any restriction (such as blocking and block size)                                                                                                         | 16                                                       |
| Allocation concealment mechanism                     | 9       | Mechanism used to implement the random allocation sequence (such as sequentially numbered containers), describing any steps taken to conceal the sequence until interventions were assigned | 16                                                       |
| Implementation                                       | 10      | Who generated the random allocation sequence, who enrolled participants, and who assigned participants to interventions                                                                     | 16                                                       |
| Blinding                                             | 11a     | If done, who was blinded after assignment to interventions (for example, participants, care providers, those assessing outcomes) and how                                                    | Page 7 in the Statistical Analysis Plan (Supplement 3)   |
|                                                      | 11b     | If relevant, description of the similarity of interventions                                                                                                                                 | Not applicable                                           |
| Statistical methods                                  | 12a     | Statistical methods used to compare groups for primary and secondary outcomes                                                                                                               | 20                                                       |
|                                                      | 12b     | Methods for additional analyses, such as subgroup analyses and adjusted analyses                                                                                                            | 20-21                                                    |
| <b>Results</b>                                       |         |                                                                                                                                                                                             |                                                          |
| Participant flow (a diagram is strongly recommended) | 13a     | For each group, the numbers of participants who were randomly assigned, received intended treatment, and were analysed for the primary outcome                                              | 22 and Figure 1                                          |
|                                                      | 13b     | For each group, losses and exclusions after randomisation, together with reasons                                                                                                            | 22 and Figure 1                                          |
| Recruitment                                          | 14a     | Dates defining the periods of recruitment and follow-up                                                                                                                                     | 22                                                       |
|                                                      | 14b     | Why the trial ended or was stopped                                                                                                                                                          | 21-22                                                    |
| Baseline data                                        | 15      | A table showing baseline demographic and clinical characteristics for each group                                                                                                            | 40-42                                                    |

| Section/Topic            | Item No | Checklist item                                                                                                                                    | Reported on page No                                                    |
|--------------------------|---------|---------------------------------------------------------------------------------------------------------------------------------------------------|------------------------------------------------------------------------|
| Numbers analysed         | 16      | For each group, number of participants (denominator) included in each analysis and whether the analysis was by original assigned groups           | 22-24                                                                  |
| Outcomes and estimation  | 17a     | For each primary and secondary outcome, results for each group, and the estimated effect size and its precision (such as 95% confidence interval) | 43-45                                                                  |
|                          | 17b     | For binary outcomes, presentation of both absolute and relative effect sizes is recommended                                                       | 43-45                                                                  |
| Ancillary analyses       | 18      | Results of any other analyses performed, including subgroup analyses and adjusted analyses, distinguishing pre-specified from exploratory         | eFigure 6, eFigure 7, eTable 3, eTable 4, and eTable 5 in Supplement 4 |
| Harms                    | 19      | All important harms or unintended effects in each group (for specific guidance see CONSORT for harms)                                             | 46-48                                                                  |
| <b>Discussion</b>        |         |                                                                                                                                                   |                                                                        |
| Limitations              | 20      | Trial limitations, addressing sources of potential bias, imprecision, and, if relevant, multiplicity of analyses                                  | 28-30                                                                  |
| Generalisability         | 21      | Generalisability (external validity, applicability) of the trial findings                                                                         | 30                                                                     |
| Interpretation           | 22      | Interpretation consistent with results, balancing benefits and harms, and considering other relevant evidence                                     | 30                                                                     |
| <b>Other information</b> |         |                                                                                                                                                   |                                                                        |
| Registration             | 23      | Registration number and name of trial registry                                                                                                    | 12                                                                     |
| Protocol                 | 24      | Where the full trial protocol can be accessed, if available                                                                                       | Supplement 2<br>Or<br>DOI:<br>10.1177/1747493020925349                 |
| Funding                  | 25      | Sources of funding and other support (such as supply of drugs), role of funders                                                                   | 32                                                                     |

## **4. eMethods**

### **4.1. eMethod 1. Inclusion and exclusion criteria**

#### 4.1.1. Inclusion criteria

- (1) Aged 18 years or older;
- (2) Presenting with acute ischemic stroke symptom within 4.5 hours;
- (3) Eligible for intravenous alteplase;
- (4) Occlusion of the intracranial internal carotid artery or the first segment of the middle cerebral artery confirmed by CT or MR angiography;
- (5) Randomization no later than 4 hours 15 minutes after stroke symptom onset. Time of stroke onset was defined as time last known well;
- (6) Informed consent obtained from patients or their legal representatives.

#### 4.1.2. Exclusion criteria

- (1) CT or MR evidence of hemorrhage (the presence of micro-bleeds is allowed);
- (2) Contraindications of intravenous alteplase;
- (3) Pre-morbidity with a modified Rankin scale score of 0 to 2;
- (4) Currently in pregnant or lactating or serum beta HCG test is positive on admission;
- (5) Contraindication to radiographic contrast agents, nickel, titanium metals or their alloys;
- (6) Arterial tortuosity and/or other arterial disease that would prevent the device from reaching the target vessel;
- (7) Patients with a preexisting neurological or psychiatric disease that would confound the neurological functional evaluations;
- (8) Patients with occlusions in multiple vascular territories (e.g. bilateral anterior circulation, or anterior/posterior circulation);
- (9) CT or MR evidence of mass effect or intracranial tumor (except small meningioma);
- (10) CT or MR evidence of cerebral vasculitis;
- (11) CT or MR angiography evidence of intracranial arteriovenous malformations or aneurysms;
- (12) Any terminal illness with life expectancy less than 6 months;
- (13) Unlikely to be available for 90-day follow-up;
- (14) Current participation in another clinical trial.

#### **4.2 eMethod 2. Early termination of the trial**

The first interim analysis of DEVT was scheduled to occur after 194 patients had completed their 90-day clinical outcome. After the publication of the positive findings of the DIRECT-MT study<sup>1</sup> on May 7th, 2020, DEVT had enrolled 235 patients but had not yet arrived at 194 patients with completed 90-day outcomes (the scheduled endpoint for our interim analysis).

The steering committee made a decision to stop enrollment into the trial. After consultation with the Data and Safety Monitoring Board chairman (Dr. Anding Xu, The First Affiliated Hospital of Jinan University, Guangzhou, China) our interim analysis plan was accelerated by several weeks. Thus, the interim analysis was completed on 194 patients with completed 90-day outcomes on May 12th, 2020. The interim analysis was performed according to all prespecified criteria. For details, see Figure S2 in this file. At this point the Data and Safety Monitoring Board recommended to the Steering Committee early stopping of trial enrollment for efficacy. The last patient who completed 90-day follow-up on July 22th, 2020.

#### **4.3. eMethod 3. Assessment of modified Rankin scale score at 90 days**

At the 90 days follow-up visits, a local neurologist who was unaware of group assignment recorded the modified Rankin scale score in a face to face structured clinical interview and recorded the interview using a portable camera or voice recorder (in case patient who was unwilling to take video recording). The primary functional outcome was centrally assessed by two independent certified neurologists in a blinded manner by the use of the video or voice recording. Disagreements were resolved by consensus. Electronic Data Capture System did not reveal the group assignment and patients were instructed not to reveal any relevant information that could potentially lead to disclosing their treatment group to the assessors. If video or voice recording is not available, the outcomes determined by the local investigator blindly in person are used as default. It was prespecified that the missing modified Rankin scale scores at 90 days were assumed the worst possible score. If the patient was identified to be alive, we imputed a modified Rankin scale score of 5. Otherwise, we imputed a score of 6.



#### **4.4. eMethod 4. Investigator training**

The initiation meeting of the DEVT trial was held in Chongqing on April 21, 2018. The training of DEVT protocol, including the patient selection criteria, periprocedural clinical and imaging assessment, endovascular treatment technique, and the requirement of follow-up at 90 days, were conducted immediately after the initiation meeting. To speed up the enrollment progress, the steering committee recruited 6 more stroke centers and held a program training meeting in Beijing on June 30, 2018. In order to improve the endovascular treatment technique of investigators and ensure the quality of the trial, the training of study protocol and endovascular treatment technique and project promotion meeting was held once about every six months in Chongqing.

## 5. eFigures

### 5.1. eFigure 1. Overview of the DEVT trial

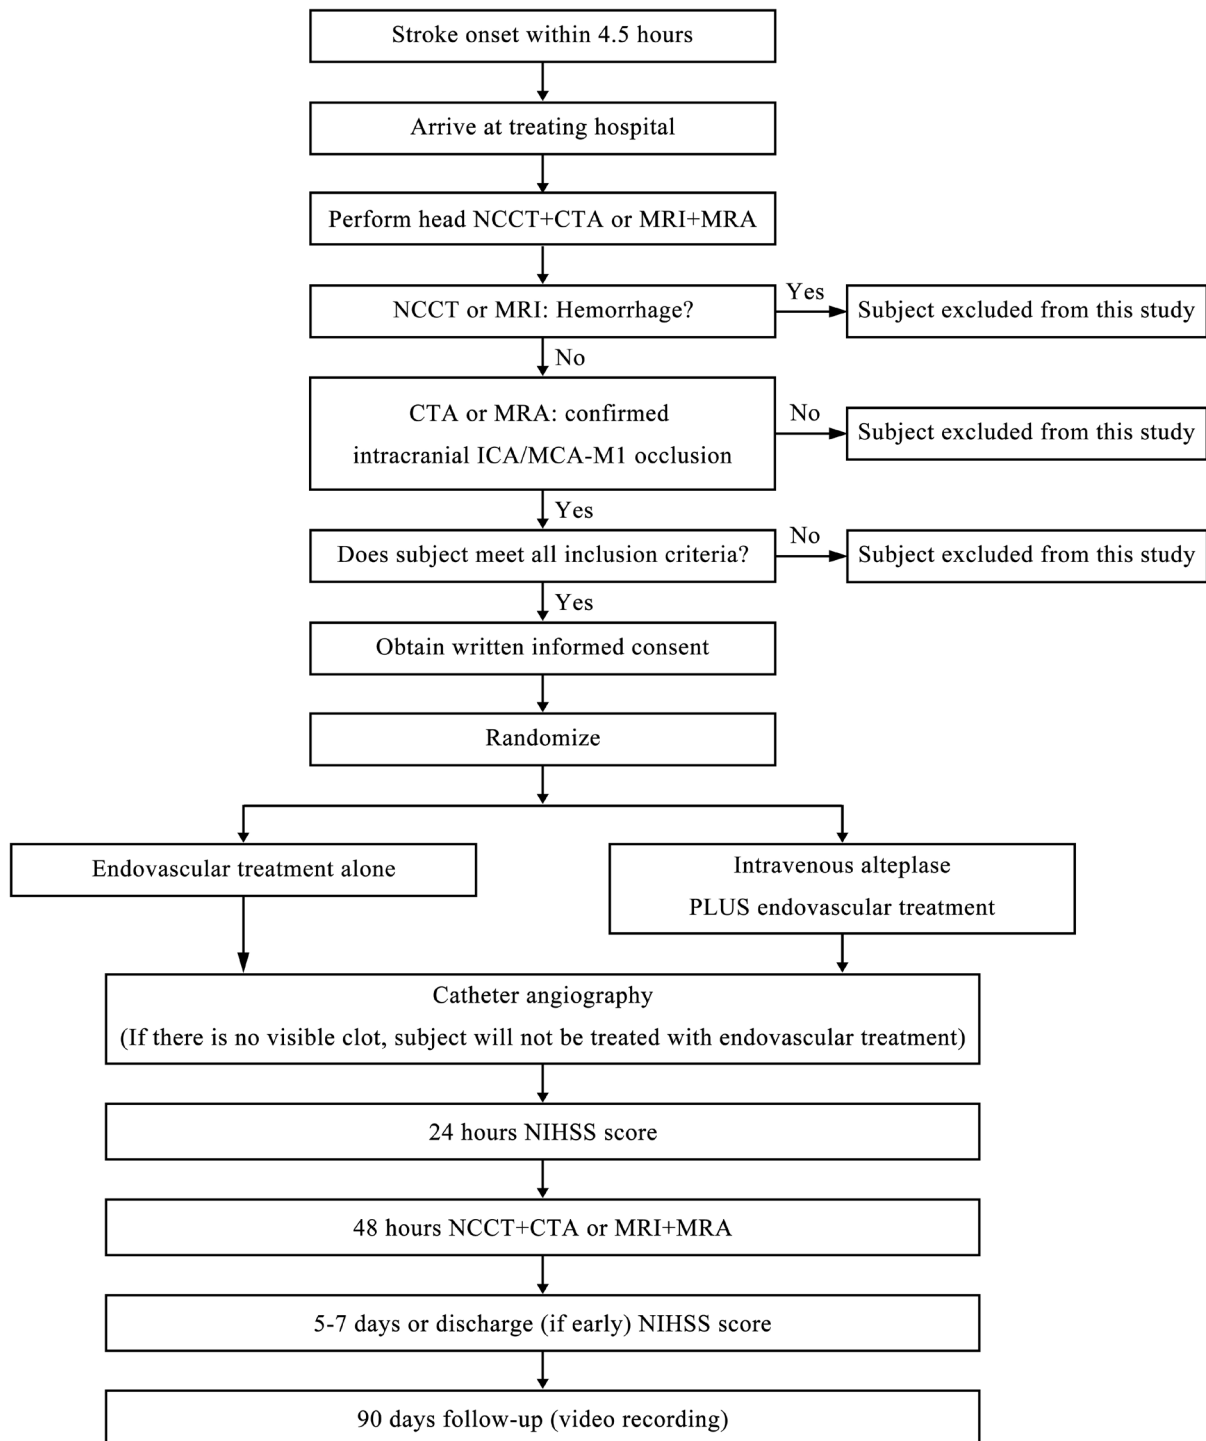

MRI denotes magnetic resonance imaging, NCCT non-contrast computed tomography.

**5.2. eFigure 2. Analysis of the primary outcome in the first interim analysis (n=194) used by the DSMB to take the decision to stop the trial**

Distribution of the modified Rankin scale scores at 90 days was shown in eFigure2A. First interim analysis according to central evaluation through video (152 evaluations), voice (6 evaluations) recording or local investigators as default (1 evaluation); thirty-five patients died before 90 days.

Efficacy Boundary Z-Value and P-Value Scale are the values such that statistics and P-Value outside this boundary at the corresponding interim indicate termination of the study and rejection of the null hypothesis, respectively. The proportion of functional independence for the endovascular thrombectomy alone group (54.64%) exceeded that of the combined IV thrombolysis and endovascular thrombectomy group (47.42%) by 7.2% (1-sided 97.5% CI, -6.8% to ∞). The non-inferiority test results demonstrated that the endovascular thrombectomy alone group was not inferior to the combined IV thrombolysis and endovascular thrombectomy group (Z=2.4042,  $P_{\text{non-inferiority}}=0.0081$ ), which had crossed the efficacy boundary (Z=2.35826,  $P_{\text{non-inferiority}}=0.00918$ ) that was prespecified for early termination (eFigure 2B~C).

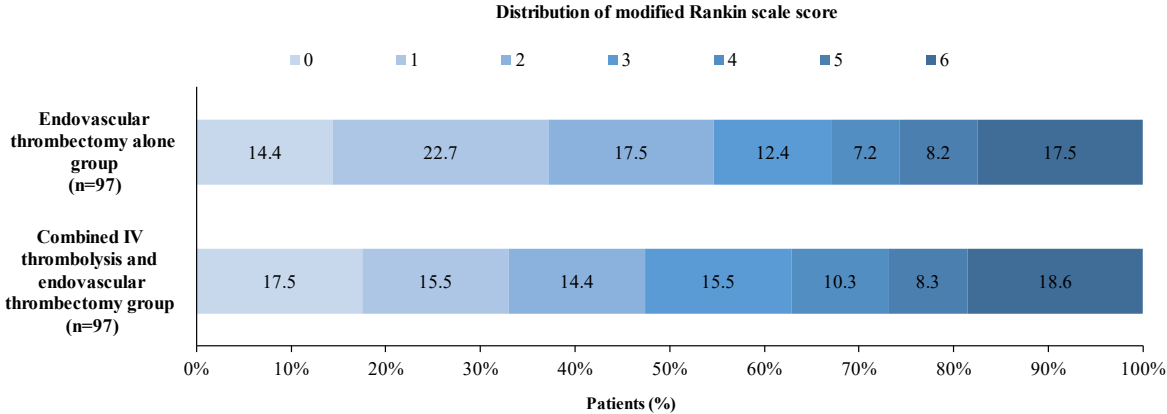

eFigure 2A

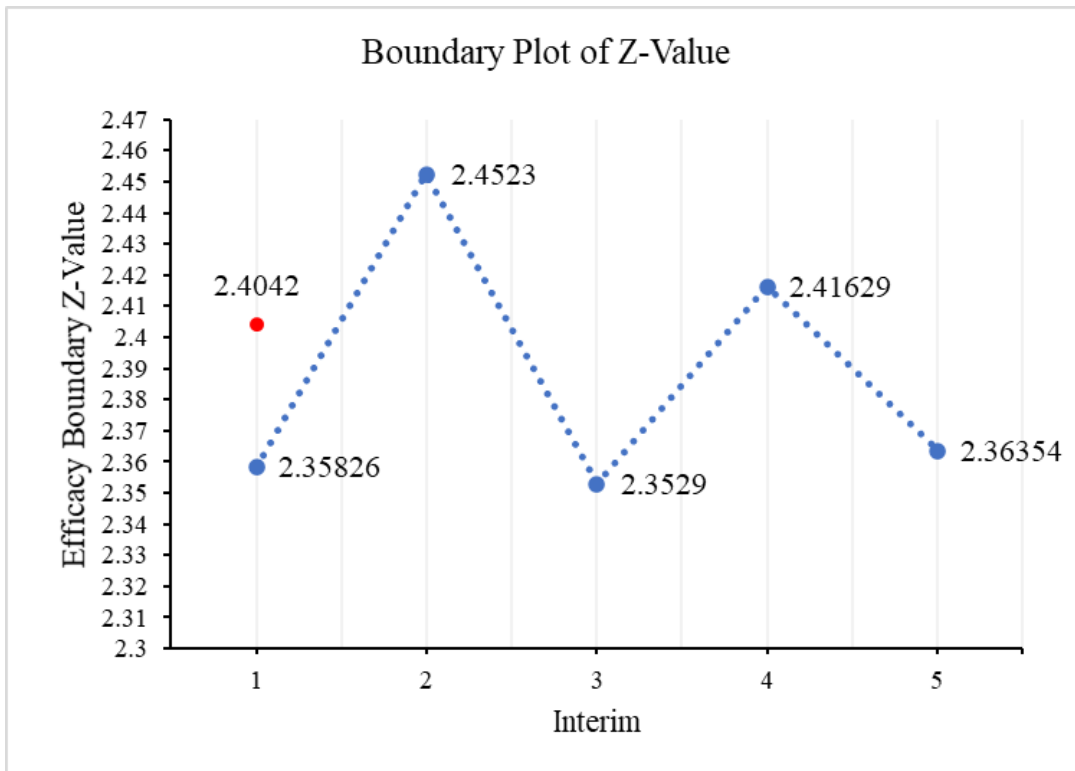

eFigure 2B

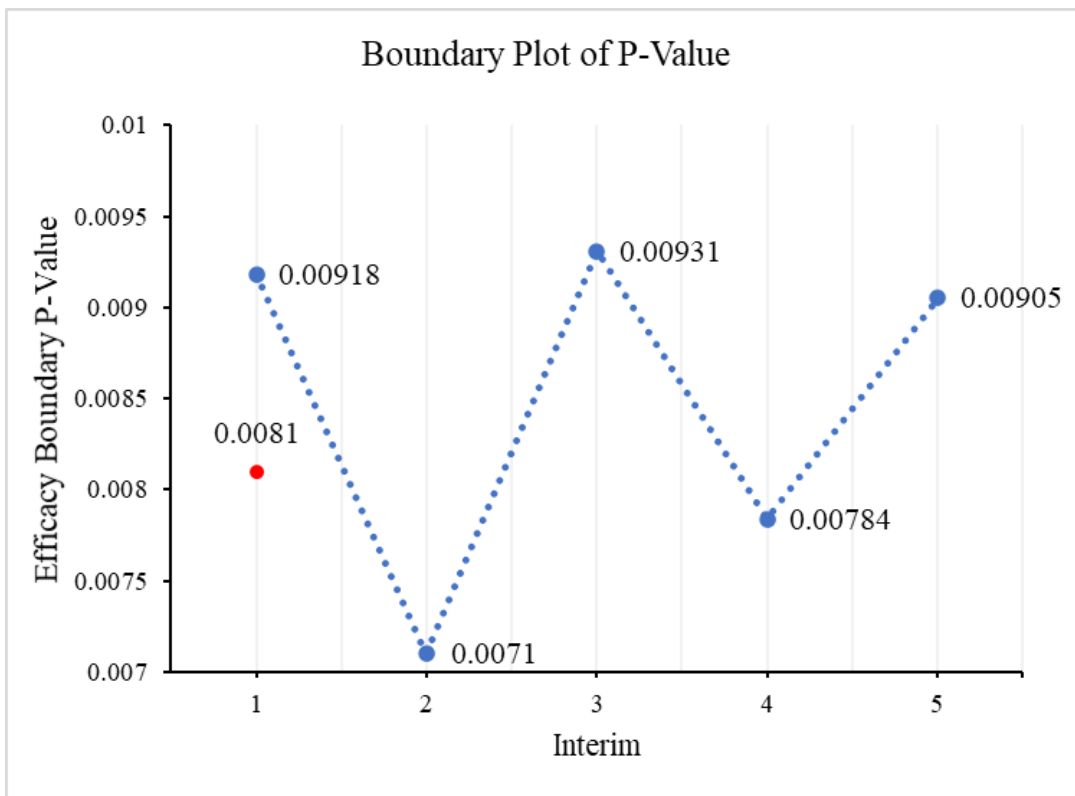

eFigure 2C

5.3. eFigure 3. Distribution of participating centers on the map of China

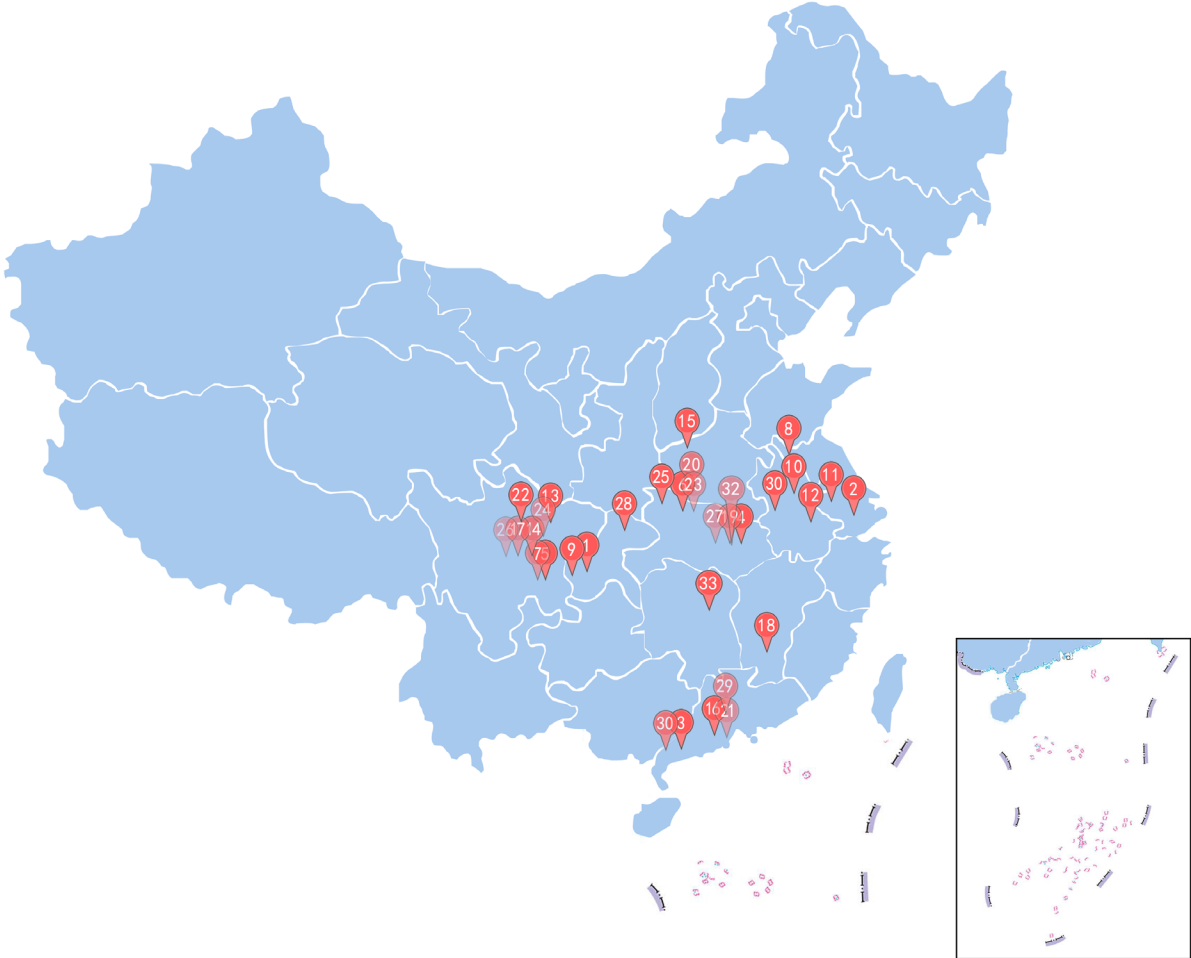

5.4. eFigure 4. Number of patients recruited by each center.

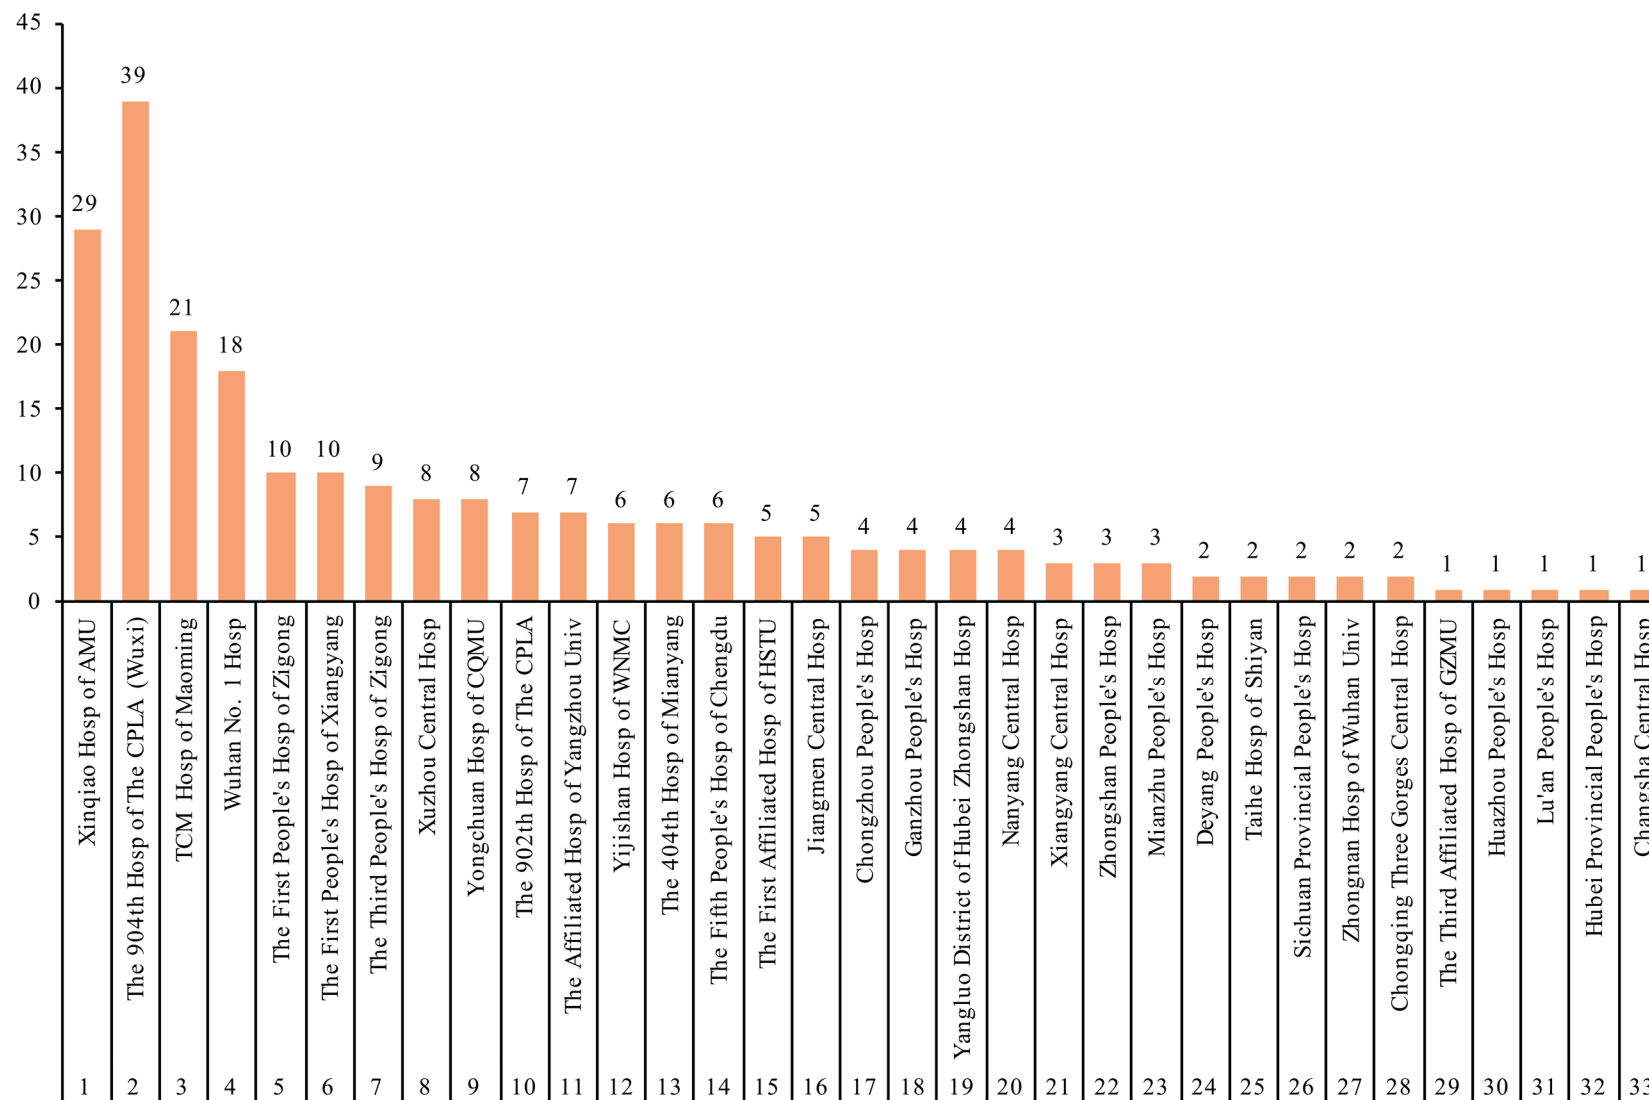

5.5. eFigure 5. Kaplan-Meier estimates of the probability of death in patients

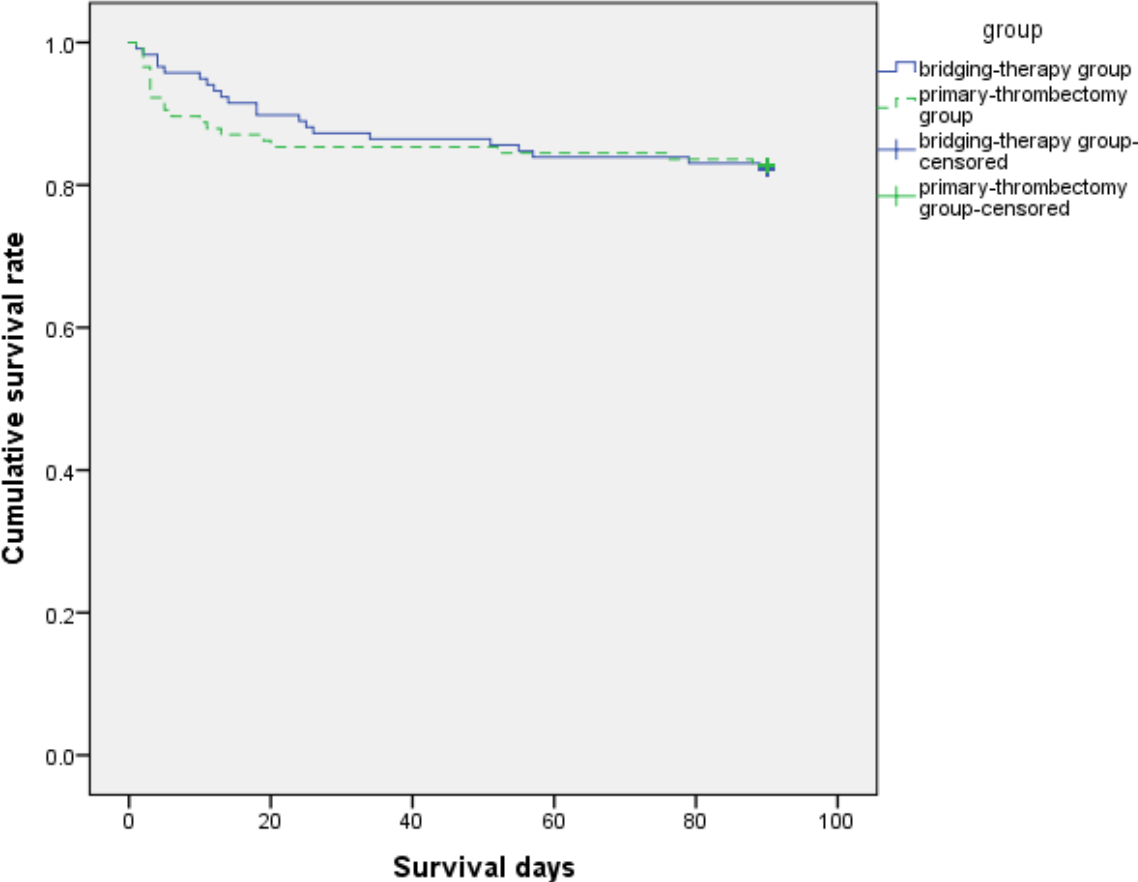

Log-Rank test: P = 0.998

### 5.6. eFigure 6. Analysis of functional independence at 90 days in prespecified subgroups.

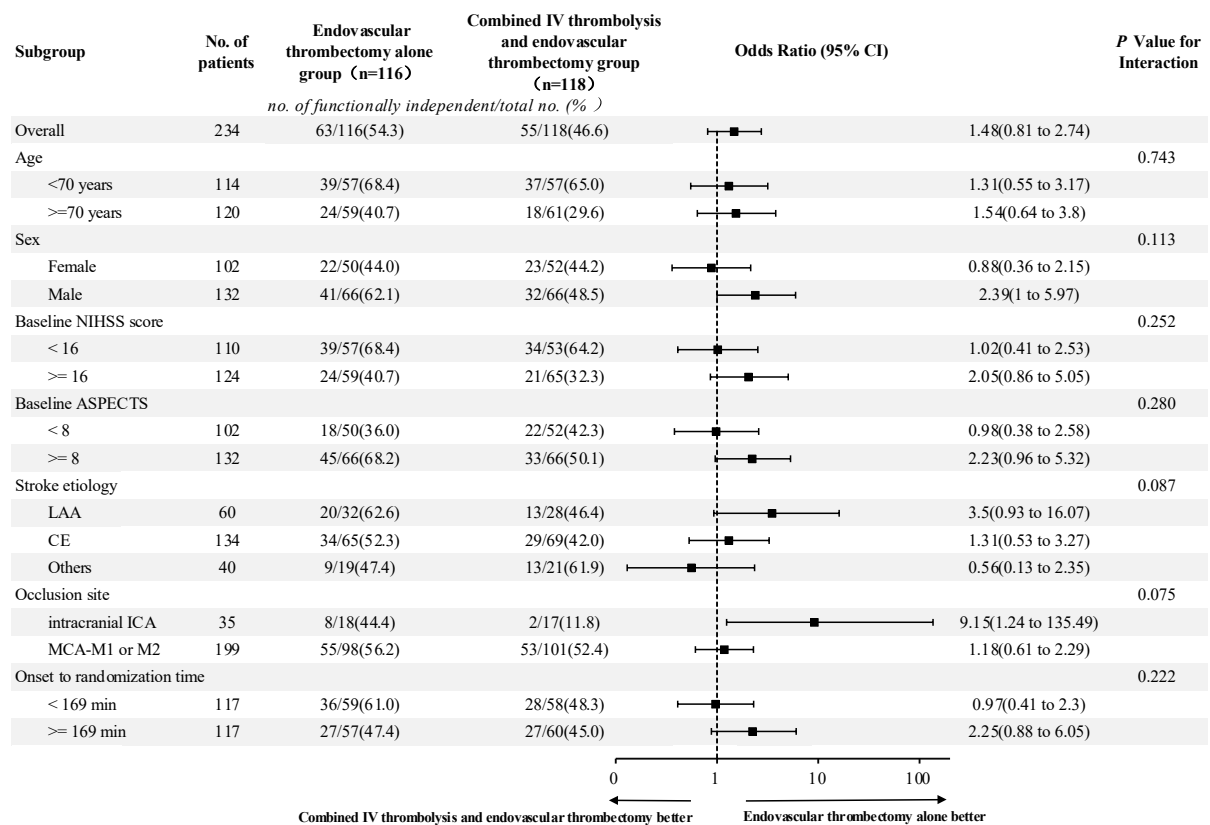

This forest plot shows that there was no evidence of heterogeneity of treatment effect across in most prespecified subgroups. The odds ratio was calculated by using logistic regression taking the following variables into account: age, baseline NIHSS score, baseline ASPECTS, occlusion site, and time from onset to randomization. Time of stroke onset was defined as time last known well. The thresholds for age, baseline NIHSS score, baseline ASPECTS, and onset to randomization time were chosen at the median. Scores on the National Institutes of Health Stroke Scale (NIHSS) range from 0 to 42, with higher scores indicating more severe neurologic deficits. The Alberta Stroke Program Early CT Score (ASPECTS) ranges from 0 to 10, with higher scores indicating a smaller infarct core. CE denotes cardioembolism, CI confidence interval, ICA internal carotid artery, LAA large artery atherosclerosis, MCA-M1 or M2 the first or second segment of middle cerebral artery.



### 5.7. eFigure 7. Distribution of modified Rankin scale scores at 90 days in prespecified subgroups

These figures show the distribution of modified Rankin scale score at 90 days among the 7 prespecified subgroups.

These groups and cut-points are:

- age ( $< 70$  or  $\geq 70$  years)
- sex (female or male)
- baseline NIHSS score ( $< 16$  or  $\geq 16$ )
- baseline ASPECTS ( $< 8$  or  $\geq 8$ )
- stroke etiology (large artery atherosclerosis, cardioembolism, or others)
- occlusion site (intracranial internal carotid artery or not)
- onset to randomization time ( $< 169$  or  $\geq 169$  minutes)

**eFigure 7A:** Distribution of modified Rankin scores at 90 days in the two groups in patients stratified by age. There is no evidence of heterogeneity of treatment effect between these subgroups ( $P_{\text{interaction}}=0.29$ , Breslow-Day test).

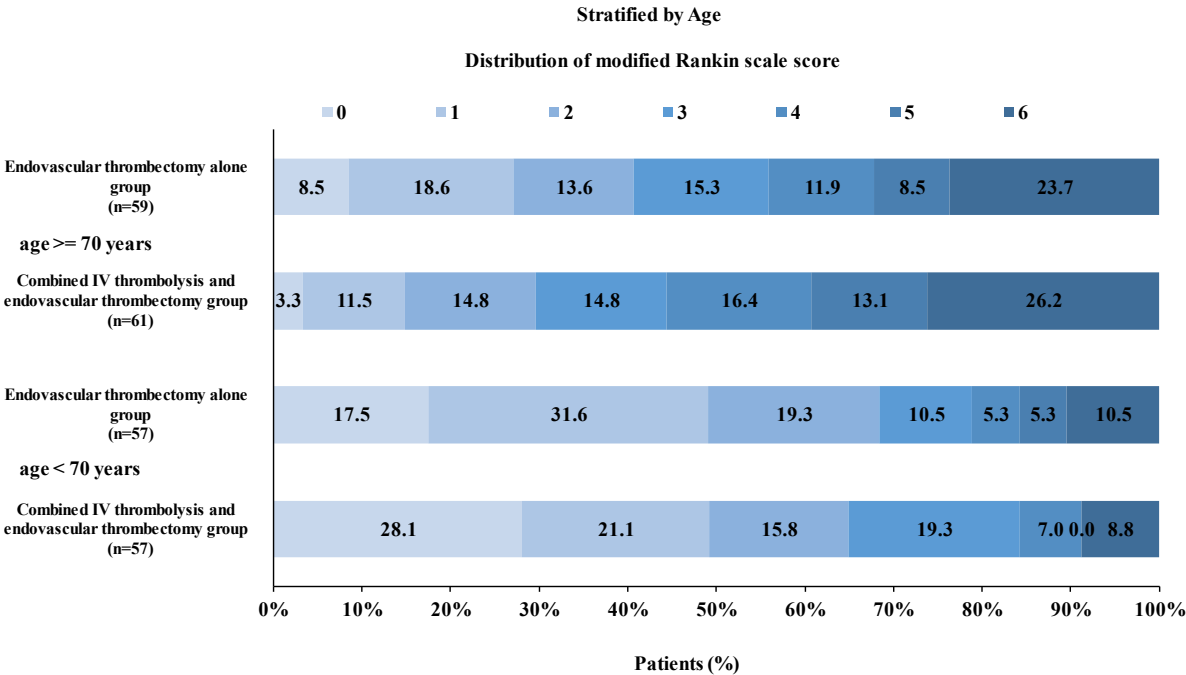

**eFigure 7B:** Distribution of modified Rankin scores at 90 days in the two groups in patients stratified by sex. There is no evidence of heterogeneity of treatment effect between these subgroups ( $P_{\text{interaction}}=0.14$ , Breslow-Day test).

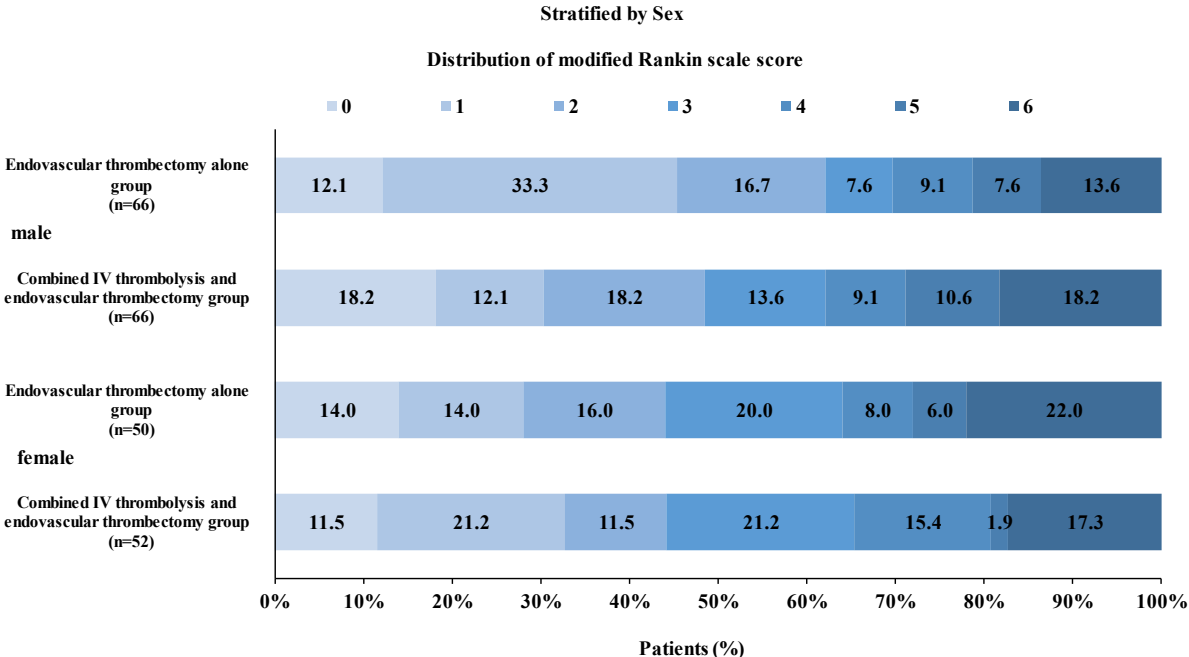

**eFigure 7C:** Distribution of modified Rankin scores at 90 days in the two groups in patients stratified by baseline NIHSS score. There is no evidence of heterogeneity of treatment effect between these subgroups ( $P_{\text{interaction}}=0.91$ , Breslow-Day test).

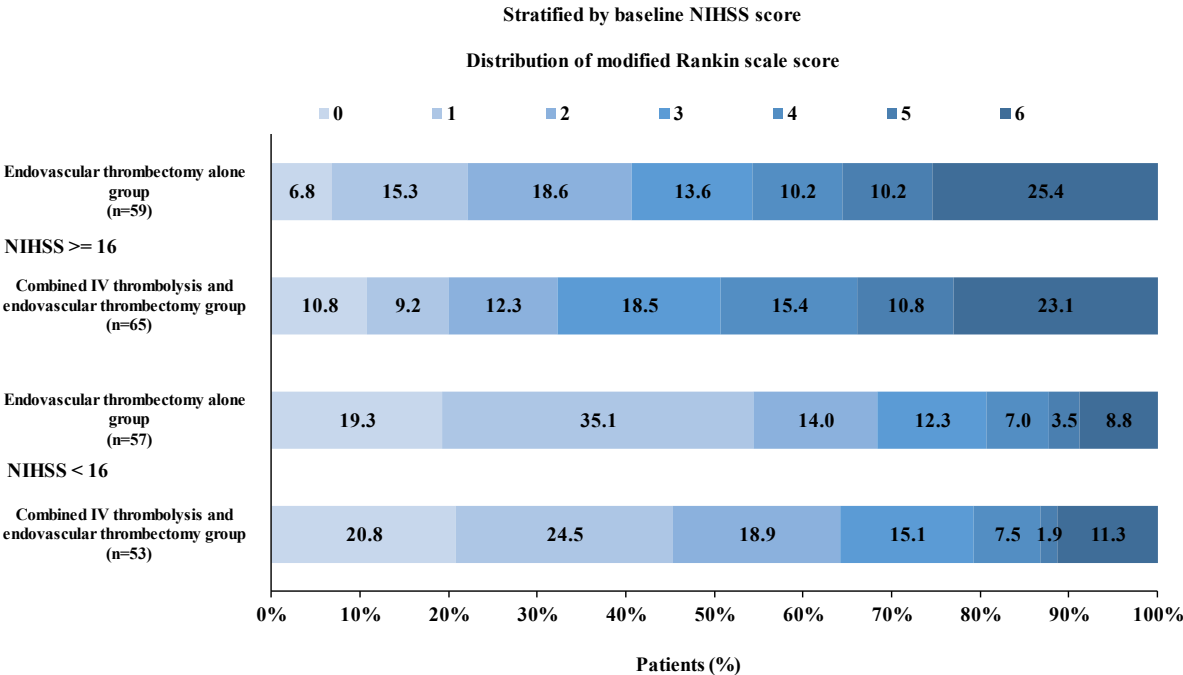

**eFigure 7D:** Distribution of modified Rankin scores at 90 days in the two groups in patients stratified by baseline ASPECTS. There is no evidence of heterogeneity of treatment effect between these subgroups ( $P_{\text{interaction}}=0.09$ , Breslow-Day test).

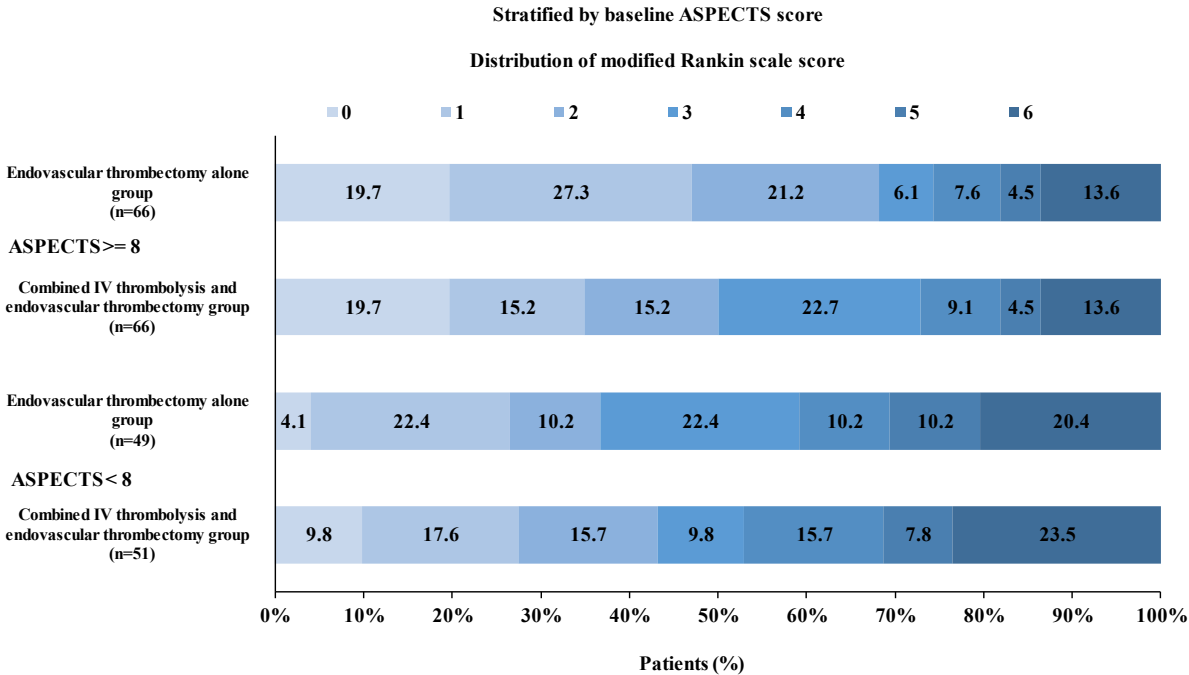

**eFigure 7E:** Distribution of modified Rankin scores at 90 days in the two groups in patients stratified by stroke etiology. There is no evidence of heterogeneity of treatment effect between these subgroups ( $P_{\text{interaction}}=0.82$ , Breslow-Day test).

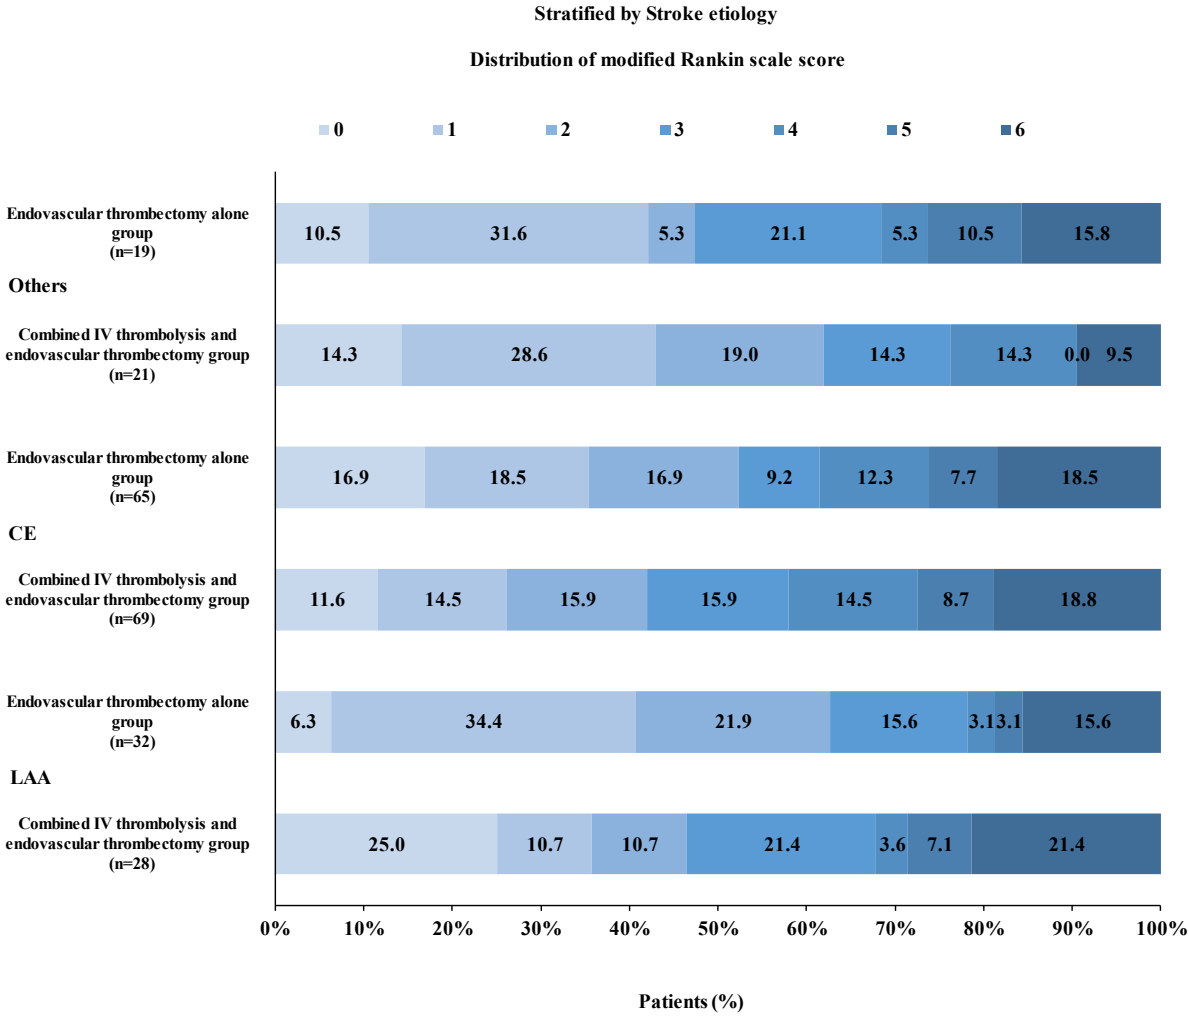

Others type contained stroke of undetermined cause and stroke of other determined cause.  
LAA denotes large artery atherosclerosis, CE cardioembolism.

**eFigure 7F:** Distribution of modified Rankin scores at 90 days in the two groups in patients stratified by occlusion site (intracranial internal carotid artery occlusion or not). There is no evidence of heterogeneity of treatment effect between these subgroups ( $P_{\text{interaction}}=0.06$ , Breslow-Day test).

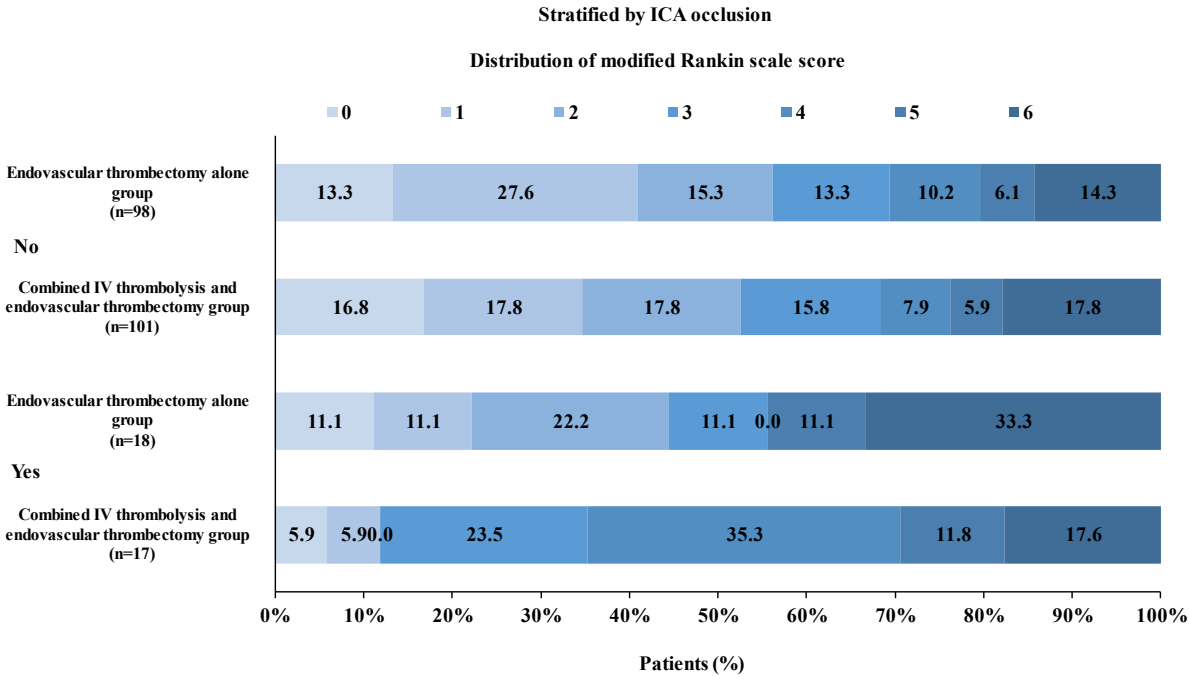

ICA denotes internal carotid artery.

**eFigure 7G:** Distribution of modified Rankin scores at 90 days in the two groups in patients stratified by onset to randomization time. There is no evidence of heterogeneity of treatment effect between these subgroups ( $P_{\text{interaction}}=0.34$ , Breslow-Day test).

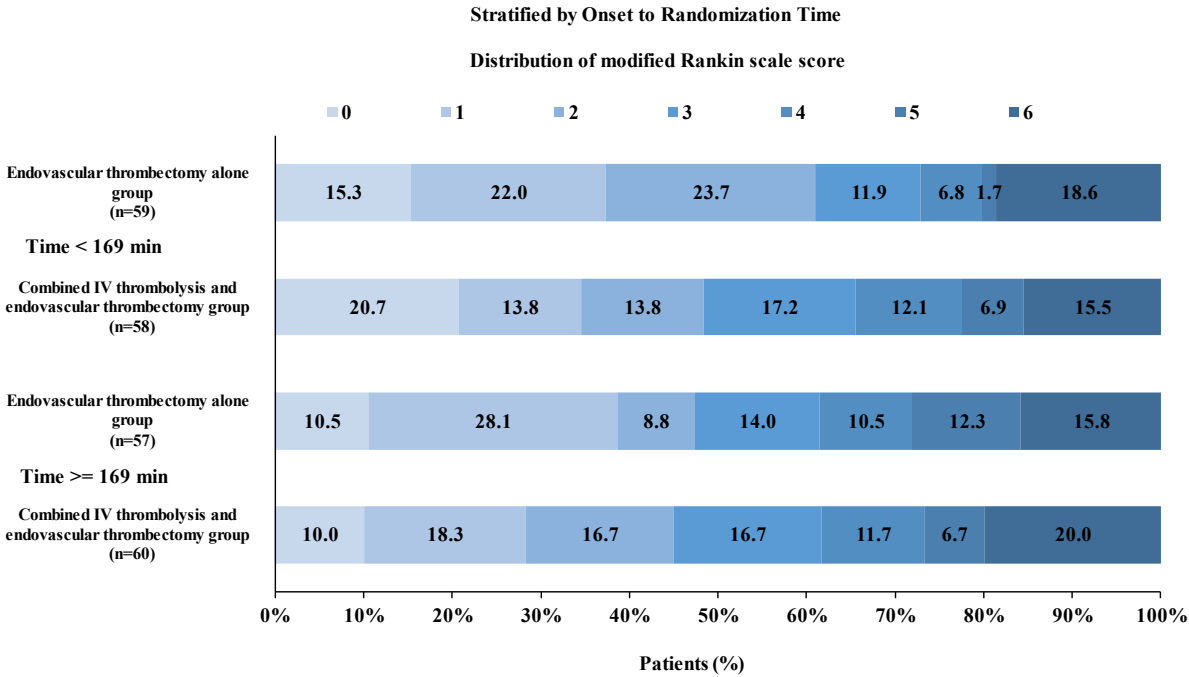



## 6. eTables

### 6.1. eTable 1. Additional baseline characteristics

|                                                                                    | <b>Endovascular thrombectomy alone group (N=116)</b> | <b>Combined IV thrombolysis and endovascular thrombectomy group (N=118)</b> |
|------------------------------------------------------------------------------------|------------------------------------------------------|-----------------------------------------------------------------------------|
| Coronary heart disease - no./total no. (%)                                         | 30 (25.9)                                            | 19(16.1)                                                                    |
| Smoking - no./total no. (%)                                                        | 28 (24.1)                                            | 29(24.6)                                                                    |
| Median platelet count in blood routine test (IQR), 10 <sup>9</sup> /L <sup>a</sup> | 185(146-224)                                         | 180(148-217)                                                                |
| Median international normalized ratio (IQR) <sup>b</sup>                           | 1.00(0.95-1.11)                                      | 1.02(0.95-1.10)                                                             |
| Location of stroke in right hemisphere - no./total no. (%)                         | 58 (50.0)                                            | 61 (51.7)                                                                   |
| Location of the atherosclerotic lesion - no./total no. (%)                         |                                                      |                                                                             |
| Intracranial                                                                       | 28 (24.1)                                            | 23 (19.5)                                                                   |
| Extracranial                                                                       | 4 (3.4)                                              | 5 (4.2)                                                                     |
| <b>Collateral status, no./total no. (%)<sup>c</sup></b>                            |                                                      |                                                                             |
| ASITN/SIR grade 0                                                                  | 14/116(12.1)                                         | 8/118(6.8)                                                                  |
| ASITN/SIR grade 1                                                                  | 24/116(20.7)                                         | 28/118(23.7)                                                                |
| ASITN/SIR grade 2                                                                  | 47/116(40.5)                                         | 48/118(40.7)                                                                |
| ASITN/SIR grade 3                                                                  | 31/116(26.7)                                         | 34/118(28.8)                                                                |
| ASITN/SIR grade 4                                                                  | 0                                                    | 0                                                                           |

IQR denotes interquartile range, and ASITN/SIR American Society of Interventional and Therapeutic Neuroradiology / Society of Interventional Radiology.

<sup>a</sup> Data were missing for 5 patients (3 in the endovascular thrombectomy alone group and 2 in the combined IV thrombolysis and endovascular thrombectomy group).

<sup>b</sup> Data were missing for 6 patients (3 in the endovascular thrombectomy alone group and 3 in the combined IV thrombolysis and endovascular thrombectomy group).

<sup>c</sup> The ASITN/SIR collateral flow grading system is a 5-point scale: with 0=no collaterals visible to the ischemic site; 1=slow collaterals to the periphery of the ischemic site with persistence of some of the defect; 2=rapid collaterals to the periphery of the ischemic site with persistence of some of the defect and to only a portion of the ischemic territory; 3=collaterals with slow but complete angiographic blood flow of the ischemic bed by late venous phase; and 4=complete and rapid collateral blood flow to the vascular bed in the entire ischemic territory by retrograde perfusion.

**6.2. eTable 2. Additional workflow metrics and procedural characteristics**

|                                                                                            | <b>Endovascular thrombectomy alone group (N=116)</b> | <b>Combined IV thrombolysis and endovascular thrombectomy group (N=118)</b> |
|--------------------------------------------------------------------------------------------|------------------------------------------------------|-----------------------------------------------------------------------------|
| <b>Workflow times</b>                                                                      |                                                      |                                                                             |
| Onset to hospital arrival <sup>a</sup>                                                     | 90 (57-126)                                          | 100 (60-135)                                                                |
| Hospital arrival to imaging                                                                | 22 (16-32)                                           | 25 (15-32)                                                                  |
| Imaging to randomization                                                                   | 38 (27-56)                                           | 33 (25-60))                                                                 |
| Onset to reperfusion <sup>a</sup>                                                          | 289 (231-329)                                        | 285 (239-342)                                                               |
| Onset to start of intravenous alteplase <sup>a</sup>                                       | NA                                                   | 176 (153-225)                                                               |
| Imaging to start of intravenous alteplase                                                  | NA                                                   | 40 (34-68)                                                                  |
| Randomization to start of intravenous alteplase                                            | NA                                                   | 7 (5-10)                                                                    |
| Randomization to groin puncture                                                            | 32 (17-50)                                           | 34 (20-53)                                                                  |
| Randomization to reperfusion or procedure completion <sup>b</sup>                          | 111 (84-150)                                         | 106 (75-154)                                                                |
| Groin puncture to reperfusion or procedure completion <sup>b</sup>                         | 72 (45-113)                                          | 68 (43-107)                                                                 |
| Hospital arrival to start of intravenous alteplase, no./total no. (%)                      |                                                      |                                                                             |
| 0-90 min                                                                                   | NA                                                   | 99 (83.9)                                                                   |
| 90-180 min                                                                                 | NA                                                   | 18 (15.3)                                                                   |
| 180-270 min                                                                                | NA                                                   | 1 (0.8)                                                                     |
| Total number of stent retriever passes (Median IQR)                                        | 1 (1-2)                                              | 1 (0-2)                                                                     |
| Total number of aspiration device passes (Median IQR)                                      | 0 (0-1)                                              | 0 (0-1)                                                                     |
| Procedures performed with stent-retriever only - no./total no. (%)                         | 61 (52.6)                                            | 57 (48.3)                                                                   |
| Procedures performed with local aspiration only - no./total no. (%)                        | 17 (14.7)                                            | 18 (15.3)                                                                   |
| Procedures performed with stent-retriever and local aspiration - no./total no. (%)         | 17 (14.7)                                            | 16 (13.6)                                                                   |
| Procedures performed with neither stent-retriever nor local aspiration - no./total no. (%) | 7 (6)                                                | 11 (9.3)                                                                    |
| Intraarterial thrombolysis - no./total no. (%)                                             |                                                      |                                                                             |
| Alteplase                                                                                  | 2 (1.7)                                              | 5/116 (4.2)                                                                 |
| Urokinase                                                                                  | 3 (2.6)                                              | 1 (0.8)                                                                     |
| Intraarterial tirofiban - no./total no. (%)                                                | 19 (16.4)                                            | 15 (12.7)                                                                   |
| Extracranial stenting - no./total no. (%)                                                  | 0 (0.0)                                              | 1 (0.8)                                                                     |
| First pass effect - no./total no. (%)                                                      | 51(44.0)                                             | 51 (43.2)                                                                   |
| Rescue therapy - no./total no. (%)                                                         | 31(26.7)                                             | 33 (28.0)                                                                   |

|                                                   |               |               |
|---------------------------------------------------|---------------|---------------|
| Balloon guide catheter - no./total no. (%)        | 1(0.9)        | 1 (0.8)       |
| <b>eTICI Grade, no./total no. (%)<sup>c</sup></b> |               |               |
| 0                                                 | 1/113 (0.9)   | 3/117 (2.6)   |
| 1                                                 | 0             | 2/117 (1.7)   |
| 2a                                                | 12/113 (10.6) | 10/117 (8.6)  |
| 2b                                                | 35/113 (31.0) | 31/117 (26.5) |
| 2c                                                | 21/113 (18.6) | 21/117 (17.9) |
| 3                                                 | 44/113 (38.9) | 50/117 (42.7) |

<sup>a</sup> Time of stroke onset was defined as time last known well.

<sup>b</sup> Revascularization was defined as the first visualization of successful reperfusion, as indicated by an extended Thrombolysis in Cerebral Infarction (eTICI) score of 2b, 2c, or 3 (on a scale from 0 [no reperfusion] to 3 [complete reperfusion]). End of time interval is time of first visualization of successful reperfusion (eTICI 2b-3) in patients with reperfusion and time of the last contrast bolus in patients without reperfusion (eTICI 0-2a).

<sup>c</sup> The eTICI reperfusion grading system is a 6-point scale: with 0 = no reperfusion noted; 1 = reduction in thrombus without filling of distal arterial branches, 2a = reperfusion of < 50% of the territory, 2b = a reperfusion of ≥ 50% of the territory, 2c = near-complete perfusion with distal slow flow or presence of small cortical emboli, and 3 is a complete reperfusion.<sup>3</sup> Data were missing for 4 patients (3 in the endovascular thrombectomy alone group and 1 in the combined IV thrombolysis and endovascular thrombectomy group).

### 6.3. eTable 3. Primary and secondary outcomes in per-protocol analysis

|                                                                                           | Endovascular thrombectomy alone group (N=111) | Combined IV thrombolysis and endovascular thrombectomy group (N=113) | Unadjusted Difference (95% CI) | Adjusted Odds Ratios (95% CI) <sup>b</sup>            |
|-------------------------------------------------------------------------------------------|-----------------------------------------------|----------------------------------------------------------------------|--------------------------------|-------------------------------------------------------|
| <b>Primary efficacy outcome<sup>a</sup></b>                                               |                                               |                                                                      |                                |                                                       |
| Functional independence (mRS 0-2) at 90 days - no./total no. (%)                          | 59 (53.2)                                     | 52 (46.0)                                                            | 7.1 (-5.9 to ∞) <sup>a</sup>   | 1.49(0.80-2.80)                                       |
| <b>Secondary efficacy outcomes</b>                                                        |                                               |                                                                      |                                |                                                       |
| Excellent outcome (mRS 0-1) at 90 days - no./total no. (%)                                | 43 (38.7)                                     | 35 (31.0)                                                            | 7.8 (-4.7 to 20.2)             | 1.55(0.82-2.94)                                       |
| Disability level (median mRS score) at 90 days (IQR)                                      | 2(1-5)                                        | 3(1-4)                                                               | 0 (-1 to 0)                    | 1.15(0.72-1.84) <sup>c</sup>                          |
| eTICI level of 2b, 2c or 3 at final angiogram - no./total no. (%) <sup>d</sup>            | 95/108(88.0)                                  | 97/112(86.6)                                                         | 1.4 (-7.4 to 10.2)             | 1.15(0.51-2.64)                                       |
| Reperfusion on follow-up CTA or MRA within 48 hours - no./total no. (%) <sup>e</sup>      | 91/94(96.8)                                   | 89/96(92.7)                                                          | 4.1 (-2.2 to 10.4)             | 2.41(0.64-11.55)                                      |
|                                                                                           |                                               |                                                                      |                                | <b>Adjusted Beta Coefficient (95% CI)<sup>f</sup></b> |
| Median NIHSS score change from baseline at 24 hours (IQR) <sup>g</sup>                    | -4(-9 to 0)                                   | -3(-6 to -1)                                                         | -1(-2 to 1)                    | -0.38(-2.24 to 1.48)                                  |
| Median NIHSS score change from baseline at 5~7 days or early discharge (IQR) <sup>g</sup> | -7(-11 to -0)                                 | -6(-10 to -2)                                                        | 0(-2 to 2)                     | 0.88(-1.97 to 3.72)                                   |
| Median EQ-5D-5L scale score at 90 days (IQR) <sup>h</sup>                                 | 0.89(0.19-1.00)                               | 0.91(0.62-1.00)                                                      | 0(0 to 0.05)                   | 0.03(-0.05 to 0.12)                                   |

Patients achieved successful reperfusion before intervention assessed on initial digital subtraction angiography (n=5, 2 in the endovascular thrombectomy alone group and 3 in the combined IV thrombolysis and endovascular thrombectomy group), and patients with occlusion in the second segment of middle cerebral artery (n=5, 3 in the endovascular thrombectomy alone group and 2 in the combined IV thrombolysis and endovascular thrombectomy group) had been removed from the per-protocol analysis.

ASPECTS denotes Alberta Stroke Program Early CT Score, CI confidence interval, CTA computed tomography angiography, EQ-5D-5L European Quality of Life Five-Dimension Five-Level Self-Report Questionnaire, MRA magnetic resonance angiography, NA not applicable, and NIHSS National Institutes of Health Stroke Scale.

<sup>a</sup> The confidence interval non-inferiority approach was used for the analysis of primary efficacy outcome. The absolute difference between the two groups was 0.071 (1-sided 97.5% CI, -0.059 to  $\infty$ ). The lower boundary of 97.5% confidence interval was -0.059, and was greater than the non-inferiority margin -0.10 as prespecified. In addition, the non-inferiority test demonstrated that Z value and P value was 2.5711 and 0.0051, respectively, which had crossed the first-interim efficacy boundaries (Z-value Scale=2.3526, P-Value Scale=0.00918). Therefore, it could be concluded that endovascular treatment alone is non-inferior to intravenous alteplase plus endovascular treatment and the trial could be terminated early.

<sup>b</sup> Values were adjusted for age, baseline NIHSS score, baseline ASPECTS, occlusion site, and time from Onset to randomization, as prespecified in the protocol and statistical analysis plan.

<sup>c</sup> Common odds ratio: the analysis involved 116 patients in endovascular thrombectomy alone group and 118 patients in combined IV thrombolysis and endovascular thrombectomy group. The common odds ratio was estimated from an ordinal logistic regression model and indicates the odds of improvement of 1 point on the mRS, with a common odds ratio greater than 1 favoring the endovascular thrombectomy treatment alone.

<sup>d</sup> The eTICI grade was determined at the final angiogram and ranged from 0 (no reperfusion) to 6 (completed reperfusion). An eTICI of 2b-3 indicates successful reperfusion. Four data were missing (3 in the endovascular thrombectomy alone group and 1 in the combined IV thrombolysis and endovascular thrombectomy group). A complete list of eTICI grade was provided in eTable 2 in the Supplement.

<sup>e</sup> Data for follow-up CTA or MRA were not available for 23 patients (12 in the endovascular thrombectomy alone group and 11 in the combined IV thrombolysis and endovascular thrombectomy group). 11 patients failed in reperfusion (5 in the endovascular thrombectomy alone group and 6 in the combined IV thrombolysis and endovascular thrombectomy group). Vessel patency was adjudicated by two blinded independent neuro-radiologists in imaging core laboratory. Disagreements were resolved through consensus.

<sup>f</sup> The Beta coefficient was estimated from a multivariable linear regression model.

<sup>g</sup> Scores on NIHSS range from 0 to 42, with less scores indicating less severe neurologic deficits.

<sup>h</sup> Scores on the EQ-5D-5L range from -0.39 (where 0 is the value of a health state equivalent to dead; negative values representing values as worse than dead) to 1 (full health), with higher scores indicating a better quality of life.

#### 6.4. eTable 4. Safety outcomes in per-protocol analysis

|                                                                                   | <b>Endovascular thrombectomy alone group (N=111)</b> | <b>Combined IV thrombolysis and endovascular thrombectomy group (N=113)</b> |
|-----------------------------------------------------------------------------------|------------------------------------------------------|-----------------------------------------------------------------------------|
| <b>Severe adverse events - no./total no. (%)</b>                                  |                                                      |                                                                             |
| Mortality at 90 days                                                              | 20 (18.0)                                            | 20 (17.7)                                                                   |
| All intracranial hemorrhage <sup>a</sup>                                          |                                                      |                                                                             |
| Symptomatic intracerebral hemorrhage                                              | 7/110(6.4)                                           | 7/112(6.3)                                                                  |
| Asymptomatic intracranial hemorrhage                                              | 18/110(16.4)                                         | 29/112(25.9)                                                                |
| <b>Other adjudicated severe adverse events within 90 days - no./total no. (%)</b> |                                                      |                                                                             |
| Large or malignant middle cerebral artery stroke                                  | 13 (11.7)                                            | 9(8.0)                                                                      |
| Hemicraniectomy <sup>b</sup>                                                      | 3(2.7)                                               | 5(4.4)                                                                      |
| Acute respiratory failure                                                         | 14(12.6)                                             | 12(10.6)                                                                    |
| Acute heart failure                                                               | 12(10.8)                                             | 9(8.0)                                                                      |
| <b>Procedure associated complications - no./total no. (%)<sup>c</sup></b>         |                                                      |                                                                             |
| Arterial perforation                                                              | 2(1.8)                                               | 6(5.3)                                                                      |
| Arterial dissection <sup>d</sup>                                                  | 0/108(0)                                             | 1/112(0.9)                                                                  |
| Clot migration <sup>d</sup>                                                       | 20/108(18.5)                                         | 28/112(25.0)                                                                |
| Distal occlusion(s) present at procedure end <sup>e</sup>                         | 19/108(17.6)                                         | 21/112(18.8)                                                                |
| Contrast extravasation <sup>f</sup>                                               | 16/110(14.5)                                         | 17/112(15.2)                                                                |
| Puncture access complications                                                     |                                                      |                                                                             |
| Groin hematoma                                                                    | 1(0.9)                                               | 1(0.9)                                                                      |
| Groin pseudoaneurysm                                                              | 1(0.9)                                               | 5(4.4)                                                                      |

<sup>a</sup> Symptomatic intracerebral hemorrhage was assessed by a clinical events committee according to the Heidelberg criteria.<sup>4</sup> Data were not available for 2 patients (1 in the endovascular thrombectomy alone group and 1 in the combined IV thrombolysis and endovascular thrombectomy group).

<sup>b</sup> The indication of hemicraniectomy procedure was large or malignant middle cerebral artery stroke.

<sup>c</sup> All procedural-associated complications were reported by the clinical events committee.

<sup>d</sup> Data were not available for 4 patients (3 in the endovascular thrombectomy alone group and 1 in the combined IV thrombolysis and endovascular thrombectomy group).

<sup>e</sup> This item was defined as after Reperfusion of the primary occlusion site, any vessel occlusions distal from the primary occlusion site were considered emboli due to periprocedural thrombus fragmentation. Data were not available for 4 patients (3 in the endovascular thrombectomy alone group and 1 in the combined IV thrombolysis and endovascular thrombectomy group).

<sup>f</sup> Data for follow-up computed tomography or magnetic resonance were not available for 2 patients (1 in the endovascular thrombectomy alone group and 1 in the combined IV thrombolysis and endovascular thrombectomy group).

**6.5. eTable 5. The hierarchical modeling and sensitivity analyses for assessment of site effects (post hoc analysis)**

**eTable 5-A. The hierarchical modeling analysis for site effects (post hoc analysis)**

| Parameter                        | Wald Chi-Square | Pr > ChiSq | Estimate | 95% Confidence Limits of Estimate |         |
|----------------------------------|-----------------|------------|----------|-----------------------------------|---------|
|                                  |                 |            |          |                                   |         |
| Intercept                        | 2.2766          | 0.1313     | 2.4788   | -0.7411                           | 5.6987  |
| group                            | 0.6291          | 0.4277     | 0.3694   | -0.5434                           | 1.2822  |
| group*affiliation                | 0.0039          | 0.9503     | 0.00250  | -0.0761                           | 0.0811  |
| affiliation                      | 0.7616          | 0.3828     | 0.0242   | -0.0301                           | 0.0785  |
| age                              | 11.4139         | 0.0007     | -0.0491  | -0.0776                           | -0.0206 |
| Baseline NIHSS                   | 22.6831         | <.0001     | -0.1803  | -0.2546                           | -0.1061 |
| Baseline ASPECTS                 | 6.5452          | 0.0105     | 0.2119   | 0.0496                            | 0.3742  |
| Occlusion site                   | 3.3123          | 0.0688     | 0.7579   | -0.0583                           | 1.5741  |
| Time from onset to randomization | 0.3565          | 0.5504     | 0.00192  | -0.00439                          | 0.00824 |

**eTable 5-B. The sensitivity analysis for site effects after eliminating the affiliation with the largest number of enrolled patients (post hoc analysis)**

| Parameter                        | Wald Chi-Square | Pr > ChiSq | Estimate | 95% Confidence Limits of Estimate |         |
|----------------------------------|-----------------|------------|----------|-----------------------------------|---------|
|                                  |                 |            |          |                                   |         |
| Intercept                        | 2.9608          | 0.0853     | 3.0440   | -0.4233                           | 6.5112  |
| group                            | 1.7720          | 0.1831     | 0.7281   | -0.3439                           | 1.8000  |
| group*affiliation                | 0.1124          | 0.7374     | -0.0146  | -0.0998                           | 0.0706  |
| affiliation                      | 0.7056          | 0.4009     | 0.0255   | -0.0341                           | 0.0852  |
| age                              | 9.0360          | 0.0026     | -0.0482  | -0.0796                           | -0.0168 |
| Baseline NIHSS                   | 22.7705         | <.0001     | -0.2067  | -0.2917                           | -0.1218 |
| Baseline ASPECTS                 | 6.5362          | 0.0106     | 0.2315   | 0.0540                            | 0.4090  |
| Occlusion site                   | 2.3640          | 0.1242     | 0.6740   | -0.1852                           | 1.5333  |
| Time from onset to randomization | 0.0314          | 0.8594     | 0.000624 | -0.00628                          | 0.00752 |

In this sensitivity analysis, the center (The 904<sup>th</sup> Hospital of CPLA) with the largest number (39 cases) of enrolled cases was eliminated.

**eTable 5-C. The sensitivity analysis for site effects after merging the affiliations with a small number of enrolled patients (post hoc analysis)**

| Parameter                        | Wald Chi-Square | Pr > ChiSq | Estimate | 95% Confidence Limits of Estimate |         |
|----------------------------------|-----------------|------------|----------|-----------------------------------|---------|
|                                  |                 |            |          |                                   |         |
| Intercept                        | 2.2146          | 0.1367     | 2.4503   | -0.7768                           | 5.6774  |
| group                            | 0.4636          | 0.4959     | 0.3389   | -0.6366                           | 1.3143  |
| group*affiliation                | 0.0168          | 0.8969     | 0.00633  | -0.0894                           | 0.1021  |
| affiliation                      | 0.4880          | 0.4848     | 0.0239   | -0.0432                           | 0.0911  |
| age                              | 11.2405         | 0.0008     | -0.0487  | -0.0771                           | -0.0202 |
| Baseline NIHSS                   | 22.6271         | <.0001     | -0.1800  | -0.2541                           | -0.1058 |
| Baseline ASPECTS                 | 6.5561          | 0.0105     | 0.2123   | 0.0498                            | 0.3747  |
| Occlusion site                   | 3.3178          | 0.0685     | 0.7572   | -0.0576                           | 1.5719  |
| Time from onset to randomization | 0.3807          | 0.5372     | 0.00198  | -0.00432                          | 0.00828 |

We merged 5 centers with only one patient into 1 center, 5 centers with 2 patients into 1 center, 3 centers with 3 patients into 1 center, and 4 centers with 4 patients were merged into two centers, respectively.



**6.6. eTable 6. Differences between DEVT, DIRECT-MT, and SKIP trial**

|                               | DEVT                                                                                                                                                                                                                                                                                                                                                                                                                                                                                                                                                                                                         | DIRECT-MT                                                                                                                                                                                                                                                                                                                                                                                                                                                                                                                                                         | SKIP                                                                                                                                                                                                                                                                                                                                                                                                                                                |
|-------------------------------|--------------------------------------------------------------------------------------------------------------------------------------------------------------------------------------------------------------------------------------------------------------------------------------------------------------------------------------------------------------------------------------------------------------------------------------------------------------------------------------------------------------------------------------------------------------------------------------------------------------|-------------------------------------------------------------------------------------------------------------------------------------------------------------------------------------------------------------------------------------------------------------------------------------------------------------------------------------------------------------------------------------------------------------------------------------------------------------------------------------------------------------------------------------------------------------------|-----------------------------------------------------------------------------------------------------------------------------------------------------------------------------------------------------------------------------------------------------------------------------------------------------------------------------------------------------------------------------------------------------------------------------------------------------|
| Trial design                  | Non-inferiority                                                                                                                                                                                                                                                                                                                                                                                                                                                                                                                                                                                              | Change from superiority to non-inferiority                                                                                                                                                                                                                                                                                                                                                                                                                                                                                                                        | Non-inferiority                                                                                                                                                                                                                                                                                                                                                                                                                                     |
| Sample size calculation       | <ul style="list-style-type: none"> <li>● assuming that the proportion of mRS score 0 to 2 at 90 days of the endovascular treatment alone group and alteplase plus endovascular treatment group are 43%</li> <li>● non-inferiority margin is -10%</li> <li>● two-sided <math>\alpha=0.05</math>, power=0.8</li> <li>● ratio between the two groups is 1:1</li> <li>● 5-interim group-sequential trial, Pocock function to determine <math>\alpha</math> spending and Z and P value boundary</li> <li>● attrition rate = 5%</li> </ul> <p>97 cases/arm/interim, in total of 970 cases of all five interims</p> | <ul style="list-style-type: none"> <li>● assuming the proportion of mRS score 0 to 2 at 90 days of the endovascular treatment alone group and alteplase plus endovascular treatment group is 37% and 33%</li> <li>● non-inferiority margin odds ratio is 0.8</li> <li>● two-sided <math>\alpha=0.05</math>, power=0.8</li> <li>● ratio between the two groups is 1:1</li> <li>● 710 cases. 15% reduction in the sample size because of adjustment for major prognostic variables</li> <li>● dropout rate = 5%</li> </ul> <p>318 cases/arm, 636 cases in total</p> | <ul style="list-style-type: none"> <li>● assuming the proportion of mRS score 0 to 2 at 90 days of the endovascular treatment alone group and alteplase plus endovascular treatment group is 48.6% and 35.2%</li> <li>● non-inferiority margin odds ratio is 0.74</li> <li>● two-sided <math>\alpha=0.05</math>, power=0.8</li> <li>● ratio between the two groups is 1:1</li> <li>● 178 cases.</li> </ul> <p>100 cases/arm, 200 cases in total</p> |
| Inclusion criteria            | <p>Age <math>\geq</math> 18 years old<br/> mRS of 0 or 1 before onset<sup>a</sup><br/> ICA or MCA-M1 occlusion on CTA or MRA<br/> NIHSS: no limit<br/> ASPECTS: no limit<br/> Onset to randomization <math>\leq</math> 4 hours 15 minutes</p>                                                                                                                                                                                                                                                                                                                                                                | <p>Age <math>\geq</math> 18 years old<br/> mRS of 0 or 2 before onset<sup>a</sup><br/> ICA, MCA-M1 or M2 occlusion on CTA<br/> NIHSS <math>\geq</math> 2<br/> ASPECTS: no limit<br/> Onset to intravenous rt-PA <math>\leq</math> 4 hours 30 minutes</p>                                                                                                                                                                                                                                                                                                          | <p>Age <math>\geq</math> 18 and <math>&lt;</math> 86 years old<br/> mRS of 0 or 2 before onset<sup>a</sup><br/> ICA or MCA-M1 occlusion on CTA or MRA<br/> NIHSS <math>\geq</math> 6<br/> ASPECTS: DWI <math>\geq</math> 5 or CT <math>\geq</math> 6<br/> Onset to puncture <math>&lt;</math> 4 hours</p>                                                                                                                                           |
| Dose of intravenous alteplase | 0.9 mg per kilogram of body weight                                                                                                                                                                                                                                                                                                                                                                                                                                                                                                                                                                           | 0.9 mg per kilogram of body weight                                                                                                                                                                                                                                                                                                                                                                                                                                                                                                                                | 0.6 mg per kilogram of body weight                                                                                                                                                                                                                                                                                                                                                                                                                  |
| Participation hospital        | Academic tertiary hospital (9/33=27.3%)<br>Municipal tertiary hospital (21/33=63.6%)                                                                                                                                                                                                                                                                                                                                                                                                                                                                                                                         | Academic tertiary hospital (41/41=100%)                                                                                                                                                                                                                                                                                                                                                                                                                                                                                                                           | Unknown                                                                                                                                                                                                                                                                                                                                                                                                                                             |

|                           |                                                                           |                                                                               |                                           |
|---------------------------|---------------------------------------------------------------------------|-------------------------------------------------------------------------------|-------------------------------------------|
|                           | County tertiary hospital (3/33=9.1%)                                      |                                                                               |                                           |
| Participation department  | Neurology (32/33=97%)<br>Neurosurgery (1/33=3%)                           | Neurology (30/41=73.2%)<br>Neurosurgery (8/41=19.5%)<br>Radiology (3/41=7.3%) | Unknown                                   |
| Geographical distribution | Mainly in central and western China<br>(see eFigure 8 next to this table) | Mainly in eastern China                                                       | Japan                                     |
| Primary endpoint          | Proportion of mRS score of 0-2 at 90 days                                 | mRS score at 90 days                                                          | Proportion of mRS score of 0-2 at 90 days |

DIRECT-MT denotes Endovascular Thrombectomy with or without Intravenous Alteplase in Acute Stroke<sup>1</sup>, DWI diffusion weighted imaging, ICA internal carotid artery, MCA-M1 the first segment of middle cerebral artery, MCA-M2 the second segment of middle cerebral artery, NIHSS National Institutes of Health Stroke Scale, and SKIP The randomized study of endovascular therapy with versus without intravenous tissue plasminogen activator in acute stroke with ICA and M1 occlusion.<sup>5,6</sup>

<sup>a</sup> Time of stroke onset was defined as time last known well.

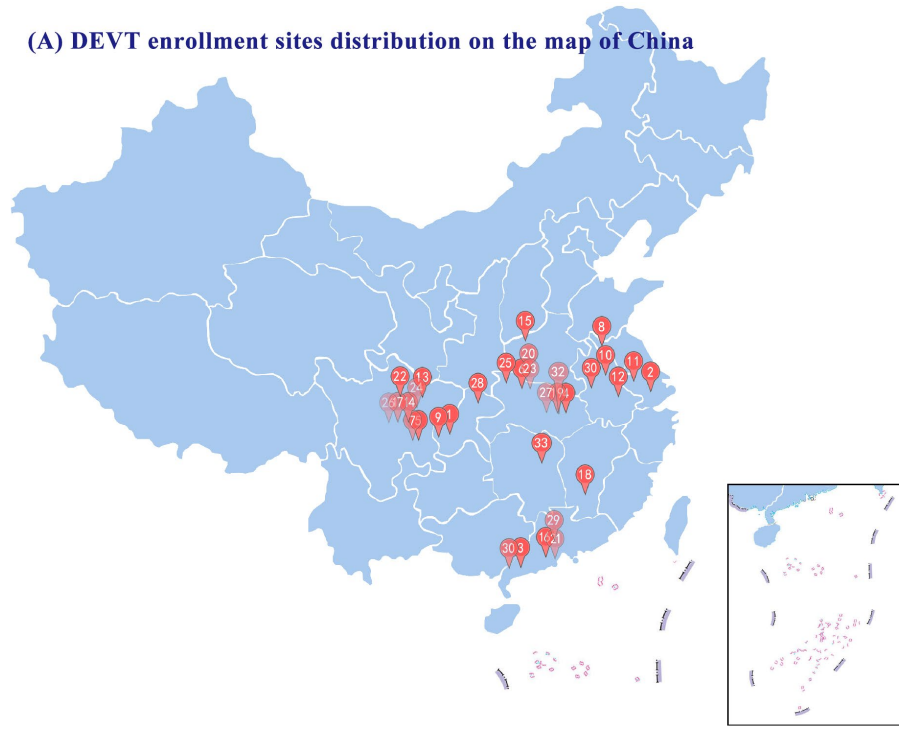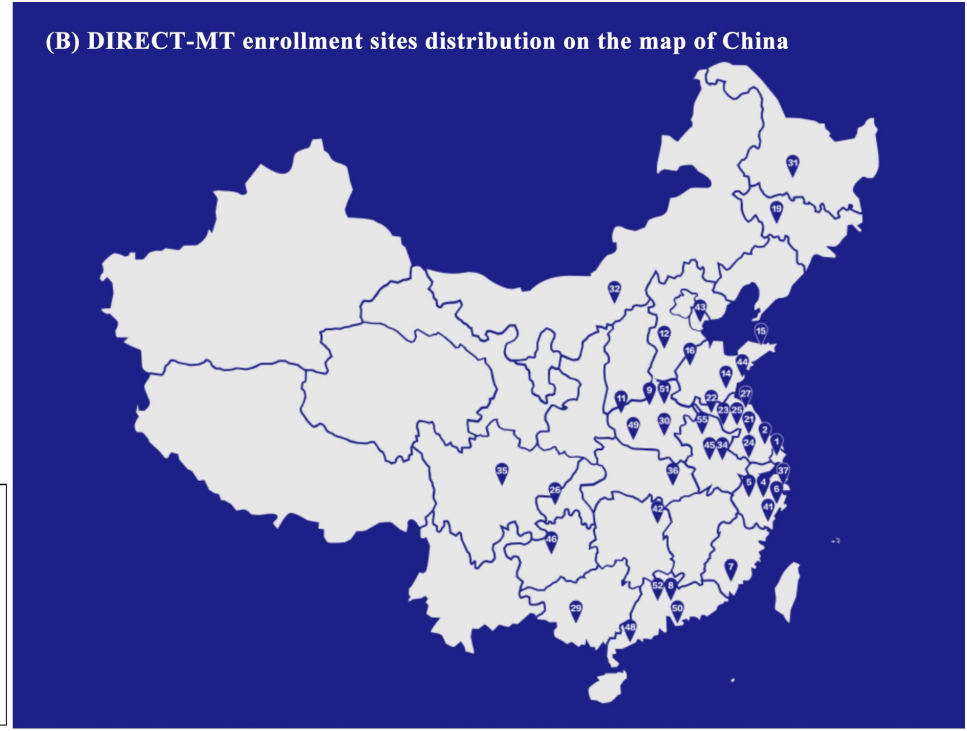

eFigure 8. Comparison of enrollment sites geographic distribution between DEVT and DIRECT-MT on the map of China.

### 6.7. eTable 7. Assessment of intracranial hemorrhage based on Heidelberg classification

| Class type description <sup>4</sup>                                                                          | Endovascular thrombectomy alone group | Combined IV thrombolysis and endovascular thrombectomy group |
|--------------------------------------------------------------------------------------------------------------|---------------------------------------|--------------------------------------------------------------|
| Hemorrhagic transformation of infarcted brain tissue, no (%)                                                 |                                       |                                                              |
| HI1 Scattered small petechiae, no mass effect                                                                | 5(20.0)                               | 7(18.4)                                                      |
| HI2 Confluent petechiae, no mass effect                                                                      | 11(44.0)                              | 19(50.0)                                                     |
| PH1 Hematoma within infarcted tissue, occupying<30%, no substantive mass effect                              | 3(12.0)                               | 2(5.3)                                                       |
| Intracerebral hemorrhage within and beyond infarcted brain tissue, no (%)                                    |                                       |                                                              |
| PH2 Hematoma occupying 30% or more of the infarcted tissue, with obvious mass effect                         | 1(4.0)                                | 2(5.3)                                                       |
| Intracerebral hemorrhage outside the infarcted brain tissue or intracranial–extracerebral hemorrhage, no (%) |                                       |                                                              |
| SAH Subarachnoid hemorrhage                                                                                  | 2(8.0)                                | 2(5.3)                                                       |
| rPH Parenchymal hematoma remote from infarcted brain tissue                                                  | 1(4.0)                                | 1(2.6)                                                       |
| IVH Intraventricular hemorrhage                                                                              | 0                                     | 0                                                            |
| SDH Subdural hemorrhage                                                                                      | 0                                     | 0                                                            |
| Combined hemorrhage of the above types, no (%)                                                               | 2(8.0)                                | 6(13.0)                                                      |
| <b>Total, no (%)</b>                                                                                         | <b>25(100)</b>                        | <b>38(100)</b>                                               |

HI denotes hemorrhagic infarction, PH parenchymatous hematoma. Data for intracranial hemorrhage were not available for 2 patients (1 in the endovascular thrombectomy alone group and 1 in the combined IV thrombolysis and endovascular thrombectomy group).

**eTable 8. Definitions of Symptomatic Intracerebral Hemorrhage**

|                                    | <b>Clinical</b>                                                                                                                                                                             | <b>Radiographic</b>  | <b>Causality of Neurological Deterioration</b>                        | <b>Time Frame</b>                                                                                                                                          |
|------------------------------------|---------------------------------------------------------------------------------------------------------------------------------------------------------------------------------------------|----------------------|-----------------------------------------------------------------------|------------------------------------------------------------------------------------------------------------------------------------------------------------|
| NINDS <sup>7</sup> definition      | Any clinical suspicion of hemorrhage or any decline in neurological status                                                                                                                  | Any hemorrhage on CT | Regardless of causal relationship                                     | CT required at 24 h and 7–10 d after stroke onset and with any clinical change suggestive of hemorrhage; primary analysis evaluated hemorrhage within 36 h |
| ECASS II <sup>8</sup> definition   | Clinical deterioration or adverse events indicating clinical worsening (eg, drowsiness, increase of hemiparesis) or causing an increase in NIHSS score of $\geq 4$ points                   | Any hemorrhage on CT | Regardless of causal relationship                                     | CT done at 22–36 h and 7 d after stroke onset                                                                                                              |
| ECASS III <sup>9</sup> definition  | Clinical deterioration defined by an increase of $\geq 4$ points in NIHSS score or that led to death                                                                                        | Any hemorrhage       | Hemorrhage as the predominant cause of the neurological deterioration | CT/MRI required at 22–36 h after stroke onset                                                                                                              |
| SITS-MOST <sup>10</sup> definition | Neurological deterioration indicated by an NIHSS score that was $\geq 4$ points higher than the baseline value or the lowest value between baseline and 24 h or hemorrhage leading to death | Local or remote PH-2 | Regardless of causal relationship                                     | CT/MRI 22–36 h after stroke onset                                                                                                                          |

CT indicates computed tomography; NINDS, National Institute of Neurological Diseases and Stroke; ECASS, European Cooperative Acute Stroke Study; NIHSS, National Institutes of Health Stroke Scale; MRI, magnetic resonance imaging; and SITS-MOST, Safe Implementation of Thrombolysis in Stroke: Monitoring Study.

## 7. eReferences

1. Yang P, Zhang Y, Zhang L, et al. Endovascular Thrombectomy with or without Intravenous Alteplase in Acute Stroke. *The New England journal of medicine*. 2020;382(21):1981-1993.
2. Zaidat OO, Yoo AJ, Khatri P, et al. Recommendations on angiographic revascularization grading standards for acute ischemic stroke: a consensus statement. *Stroke; a journal of cerebral circulation*. 2013;44(9):2650-2663.
3. Almekhlafi MA, Mishra S, Desai JA, et al. Not all "successful" angiographic reperfusion patients are an equal validation of a modified TICI scoring system. *Interv Neuroradiol*. 2014;20(1):21-27.
4. von Kummer R, Broderick JP, Campbell BC, et al. The Heidelberg Bleeding Classification: Classification of Bleeding Events After Ischemic Stroke and Reperfusion Therapy. *Stroke; a journal of cerebral circulation*. 2015;46(10):2981-2986.
5. Suzuki K, Kimura K, Takeuchi M, et al. The randomized study of endovascular therapy with versus without intravenous tissue plasminogen activator in acute stroke with ica and m1 occlusion (skip study). *International Stroke Conference*. Accessed December 1, 2020. <https://professional.heart.org/en/science-news/skip-study-clinical-trial-details>
6. Suzuki K, Kimura K, Takeuchi M, et al. The randomized study of endovascular therapy with versus without intravenous tissue plasminogen activator in acute stroke with ICA and M1 occlusion (SKIP study). *International journal of stroke : official journal of the International Stroke Society*. 2019;14(7):752-755.
7. National Institute of Neurological D, Stroke rt PAS, Study G. Tissue plasminogen activator for acute ischemic stroke. *The New England journal of medicine*. 1995-12-14 1995;333(24):1581-7. doi:10.1056/nejm199512143332401
8. Hacke W, Kaste M, Fieschi C, et al. Randomised double-blind placebo-controlled trial of thrombolytic therapy with intravenous alteplase in acute ischaemic stroke (ECASS II). *Second European-Australasian Acute Stroke Study Investigators. Lancet (London, England)*. 1998-Oct-17 1998;352(9136):1245-51. doi:10.1016/s0140-6736(98)08020-9
9. Hacke W, Kaste M, Bluhmki E, et al. Thrombolysis with alteplase 3 to 4.5 hours after acute ischemic stroke. *The New England journal of medicine*. 2008-Sep-25 2008;359(13):1317-29. doi:10.1056/NEJMoa0804656104.
10. Wahlgren N, Ahmed N, Eriksson N, et al. Multivariable analysis of outcome predictors and adjustment of main outcome results to baseline data profile in randomized controlled trials: Safe Implementation of Thrombolysis in Stroke-MONitoring STudy (SITS-MOST). *Stroke; a journal of cerebral circulation*. 2008-Dec 2008;39(12):3316-22. doi:10.1161/strokeaha.107.510768
