# Supplementary material
Source: PubMed Central journal article supplement (PMC7816099)
Supplement: jama-e2023523-s005.pdf [file jama-e2023523-s005.pdf]

## Data Sharing Statement

### Data

**Data available:** Yes

**Data types:** Deidentified participant data, Data dictionary

**How to access data:** Please email [yangqwmlys@163.com](mailto:yangqwmlys@163.com) or [ziwenjie1981@163.com](mailto:ziwenjie1981@163.com).

**When available:** With publication

### Supporting Documents

**Document types:** Statistical/analytic code

**How to access documents:** Please email [yangqwmlys@163.com](mailto:yangqwmlys@163.com) or [ziwenjie1981@163.com](mailto:ziwenjie1981@163.com).

**When available:** With publication

### Additional Information

**Who can access the data:** Qingwu Yang ([yangqwmlys@163.com](mailto:yangqwmlys@163.com)) or Wenjie Zi ([ziwenjie1981@163.com](mailto:ziwenjie1981@163.com))

**Types of analyses:** For a specified purpose

**Mechanisms of data availability:** After approval of a proposal
